# Supplementary material for: Reversal of facial selectivity in a thia-Claisen rearrangement by incorporation of a vinylic bromine substituent
Source: Royal Society of Chemistry journal article supplement (doi:10.1039/c3ob41580e), 2013-01-01
Supplement: c3ob41580e_3.pdf [file c3ob41580e_3.pdf]

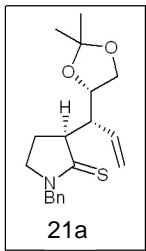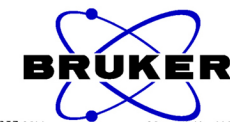

```

NAME                      Mar19-2008
EXPNO                     20
PROCNO                    1
Date_                     20080319
Time                     15.04
INSTRUM                   drx500
PROBHD                    5 mm Multinu
PULPROG                   zg30
TD                         82642
SOLVENT                   CDC13
NS                         16
DS                         2
SWH                       10330.578 Hz
FIDRES                   0.125004 Hz
AQ                       3.9999712 sec
RG                         181
DW                       48.400 use
DE                       6.00 use
TE                       300.0 K
D1                       1.00000000 sec

===== CHANNEL f1 =====
NUC1                      1H
P1                         15.50 use
PL1                       0.00 dB
SFO1                     500.1330885 MHz
SI                         65536
SF                       500.1300251 MHz
WDW                       EM
SSB                       0
LB                       0.30 Hz
GB                       0
PC                       1.00

```

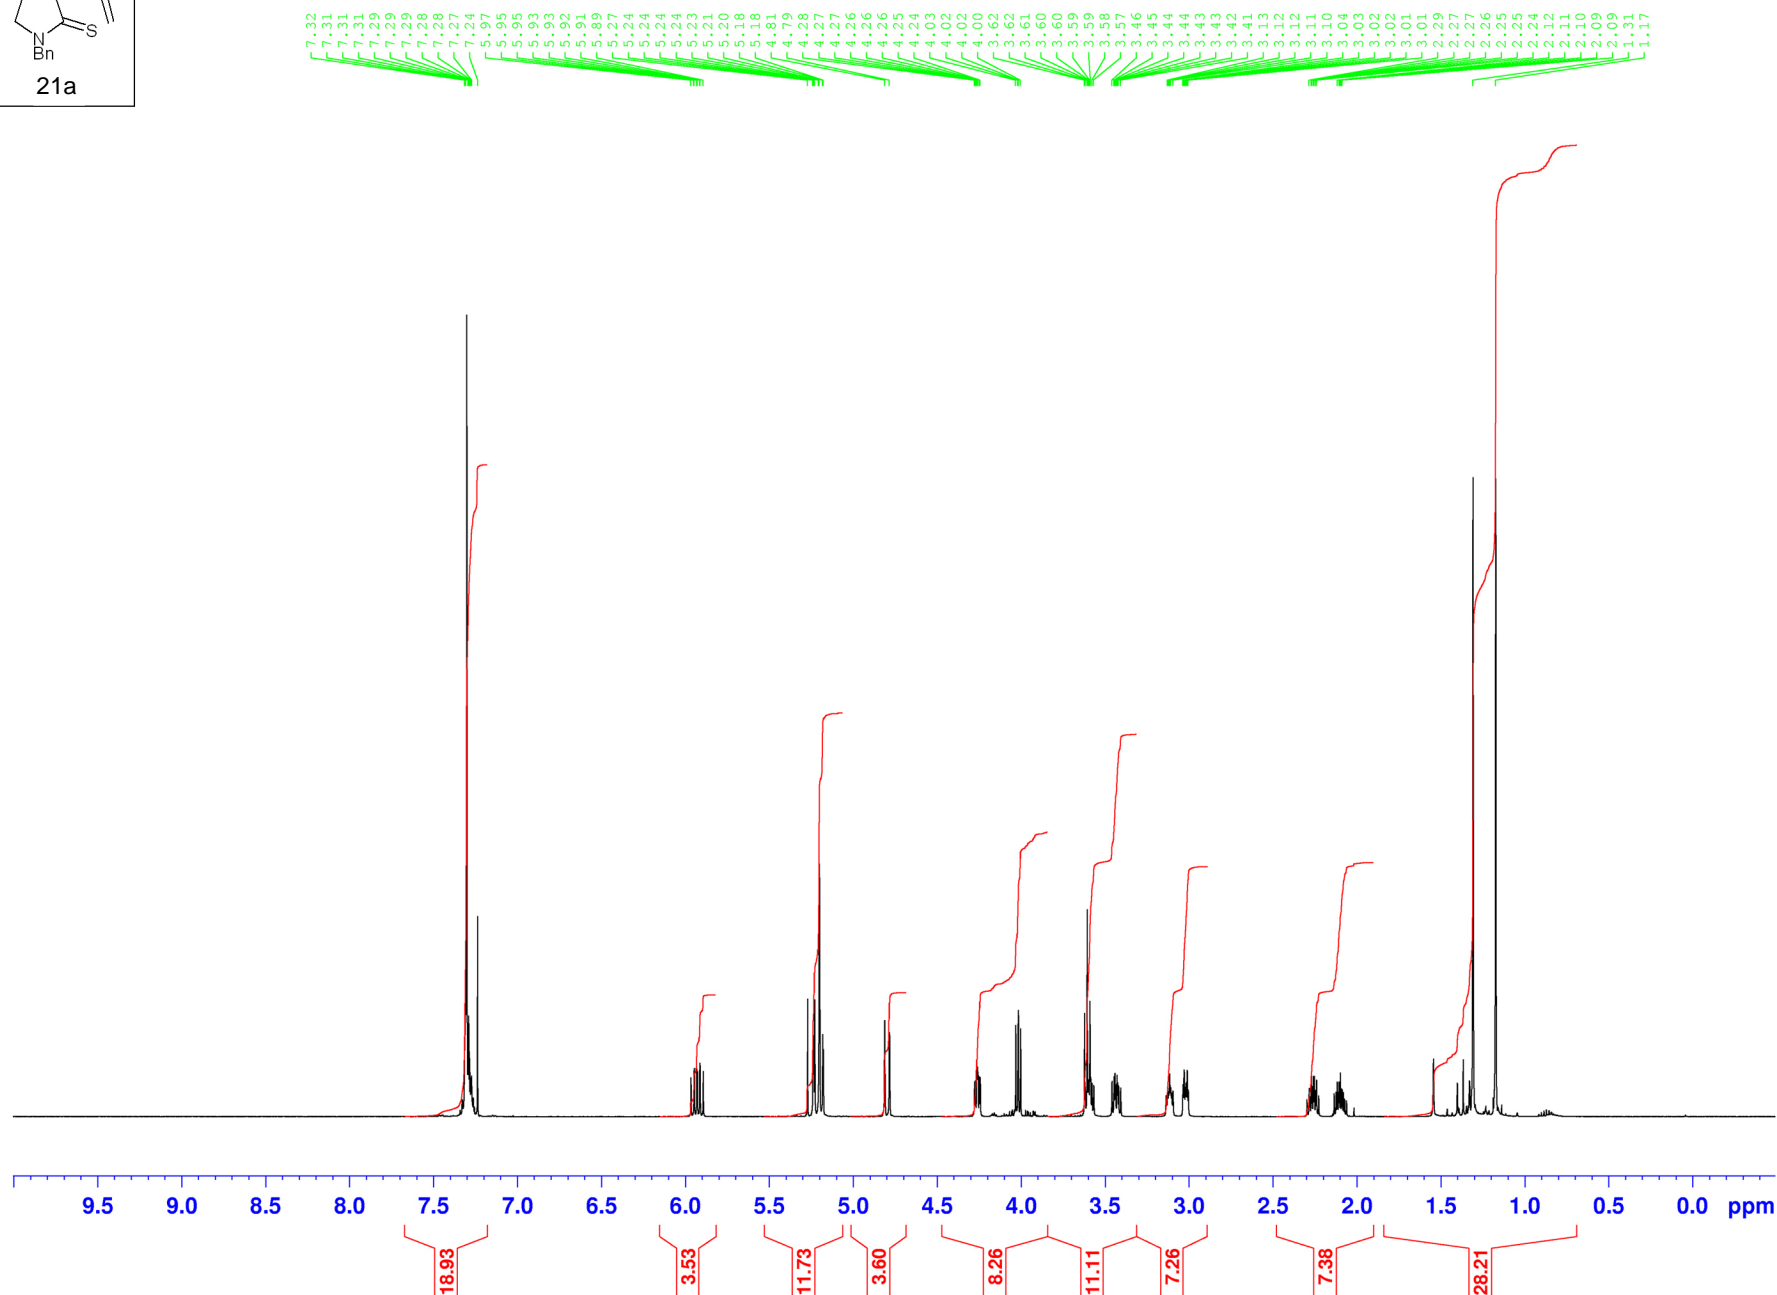

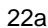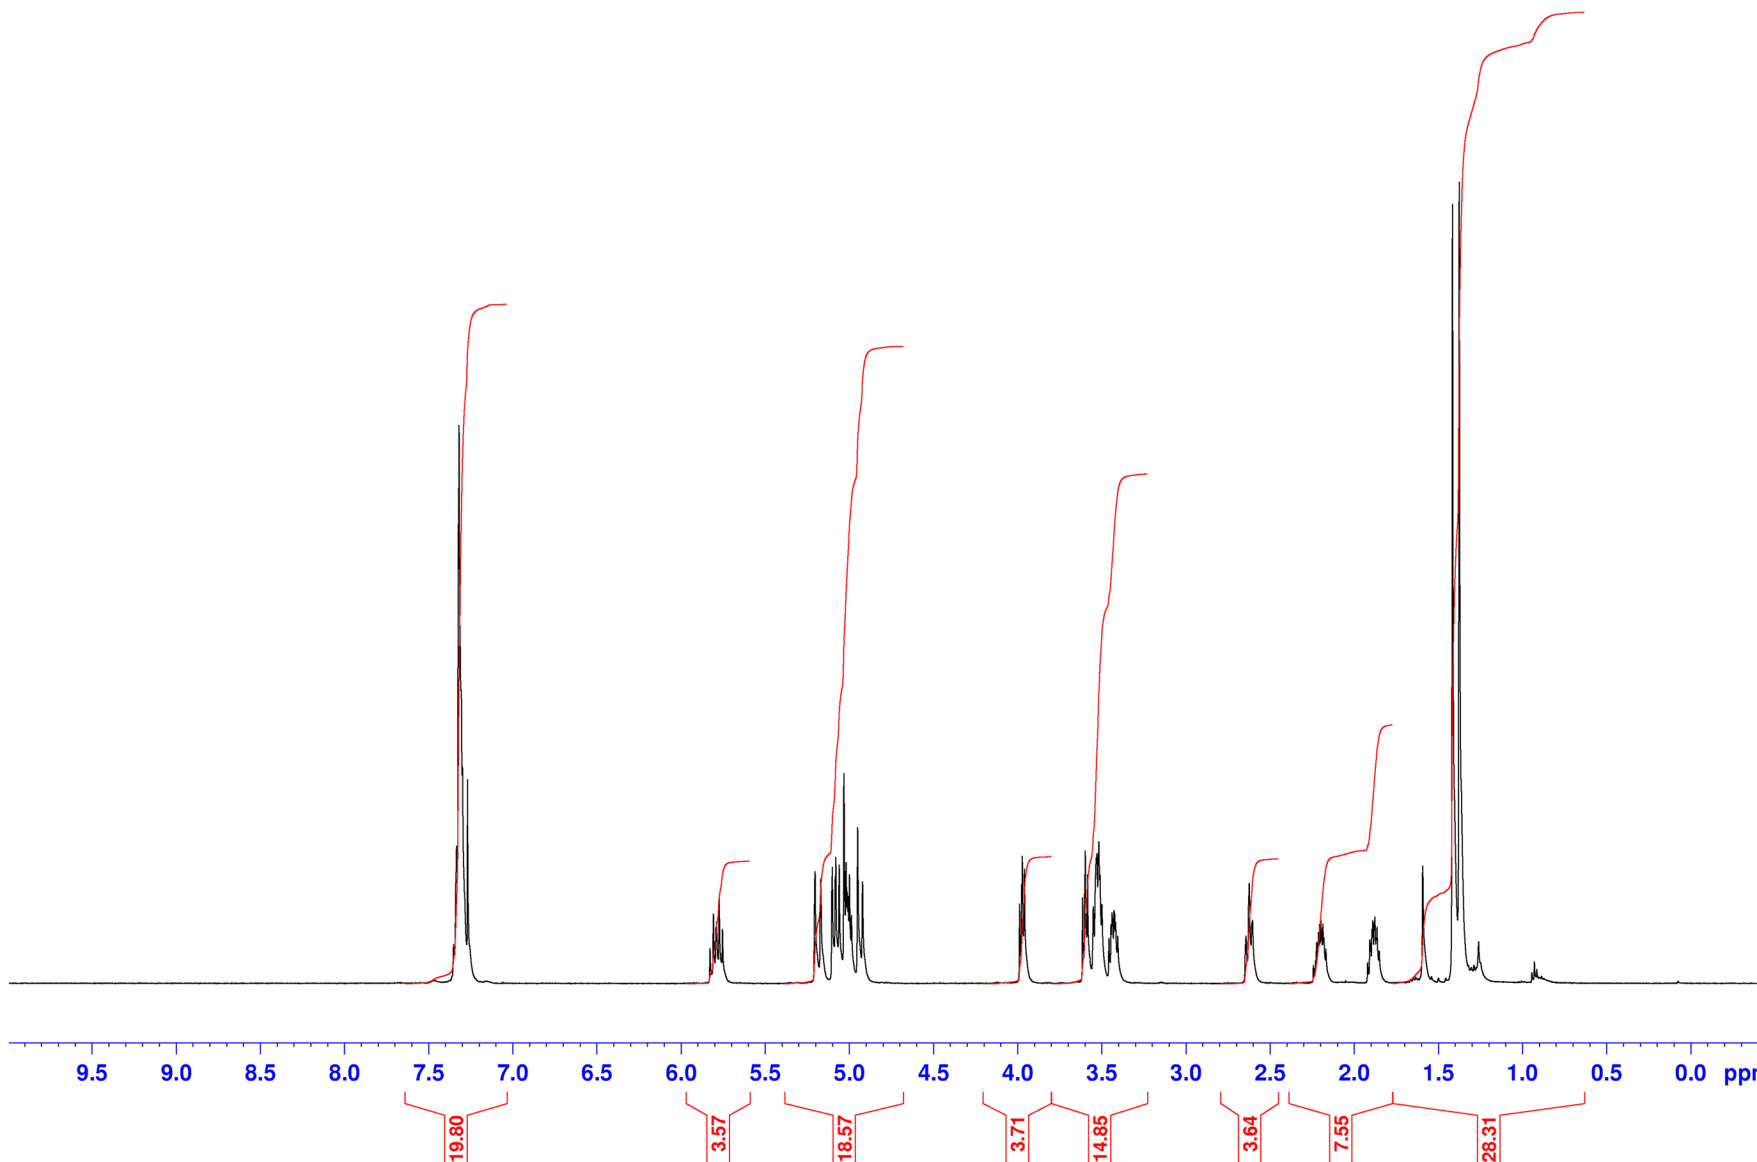

```
NAME_          Apr09-2008
EXPNO          60
PROCNO        1
Date_         20080409
Time          16.36
INSTRUM       drx500
PROBHD        5 mm Multinu
PULPROG       zg30
TD            82642
SOLVENT       CDC13
NS            16
DS            2
SWH           10330.578 Hz
FIDRES        0.125004 Hz
AQ            3.9999712 sec
RG            287.4
DW            48.400 use
DE            6.00 use
TE            300.0 K
D1            1.00000000 sec
```

```
===== CHANNEL f1 =====
NUC1                1H
P1                  15.50 use
PL1                 0.00 dB
SF01                500.1330885 MHz
SI                  65536
SF                  500.1300092 MHz
WDW                  EM
SSB                  0
LB                   0.30 Hz
GB                   0
PC                   1.00
```

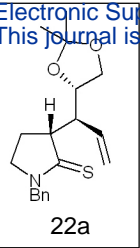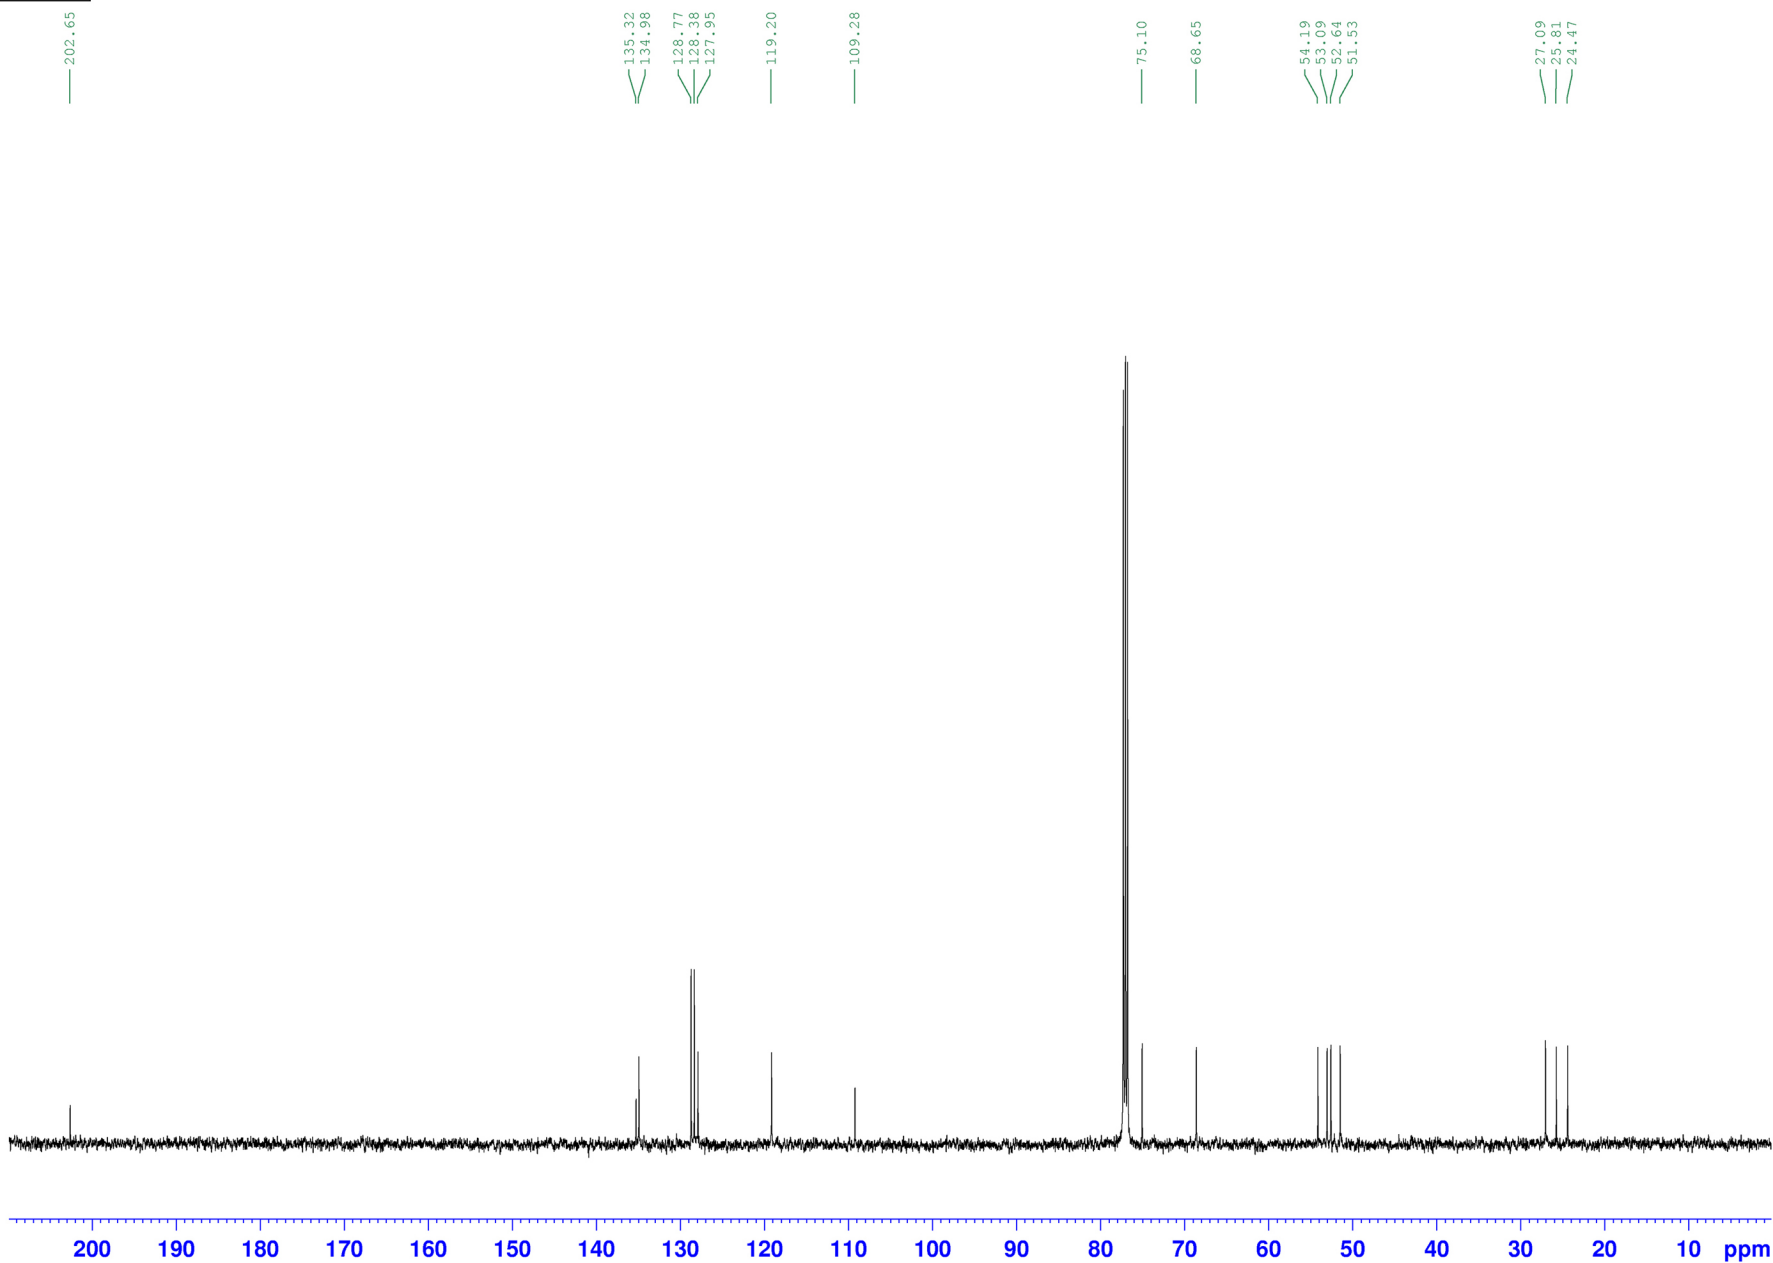

NAME Apr09-2008  
EXPNO 64  
PROCNO 1  
Date\_ 20080409  
Time 20.13  
INSTRUM drx500  
PROBHD 5 mm Multinu  
PULPROG zgpg30  
TD 65536  
SOLVENT CDCl3  
NS 256  
DS 4  
SWH 31446.541 Hz  
FIDRES 0.479836 Hz  
AQ 1.0420883 sec  
RG 3649.1  
DW 15.900 use  
DE 6.00 use  
TE 300.0 K  
D1 2.00000000 sec  
d11 0.03000000 sec  
d12 0.00002000 sec

===== CHANNEL f1 =====  
NUC1 13C  
P1 5.50 use  
PL1 0.00 dB  
SF01 125.7715719 MHz

===== CHANNEL f2 =====  
CPDPRG2 waltz16  
NUC2 1H  
PCPD2 95.00 use  
PL2 0.00 dB  
PL12 19.00 dB  
PL13 19.00 dB  
SF02 500.1320005 MHz  
SI 32768  
SF 125.7577814 MHz  
WDW EM  
SSB 0  
LB 3.00 Hz  
GB 0  
PC 1.40

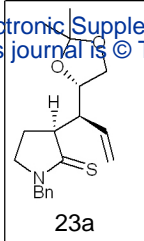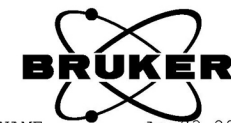

NAME Apr23-2008  
EXPNO 50  
PROCNO 1  
Date\_ 20080423  
Time 10.38  
INSTRUM drx500  
PROBHD 5 mm Multinu  
PULPROG zg30  
TD 82642  
SOLVENT CDCl3  
NS 16  
DS 2  
SWH 10330.578 Hz  
FIDRES 0.125004 Hz  
AQ 3.9999712 sec  
RG 287.4  
DW 48.400 use  
DE 6.00 use  
TE 300.0 K  
D1 1.00000000 sec

===== CHANNEL f1 =====  
NUC1 1H  
P1 15.50 use  
PL1 0.00 dB  
SF01 500.1330885 MHz  
SI 65536  
SF 500.1300000 MHz  
WDW EM  
SSB 0  
LB 0.30 Hz  
GB 0  
PC 1.00

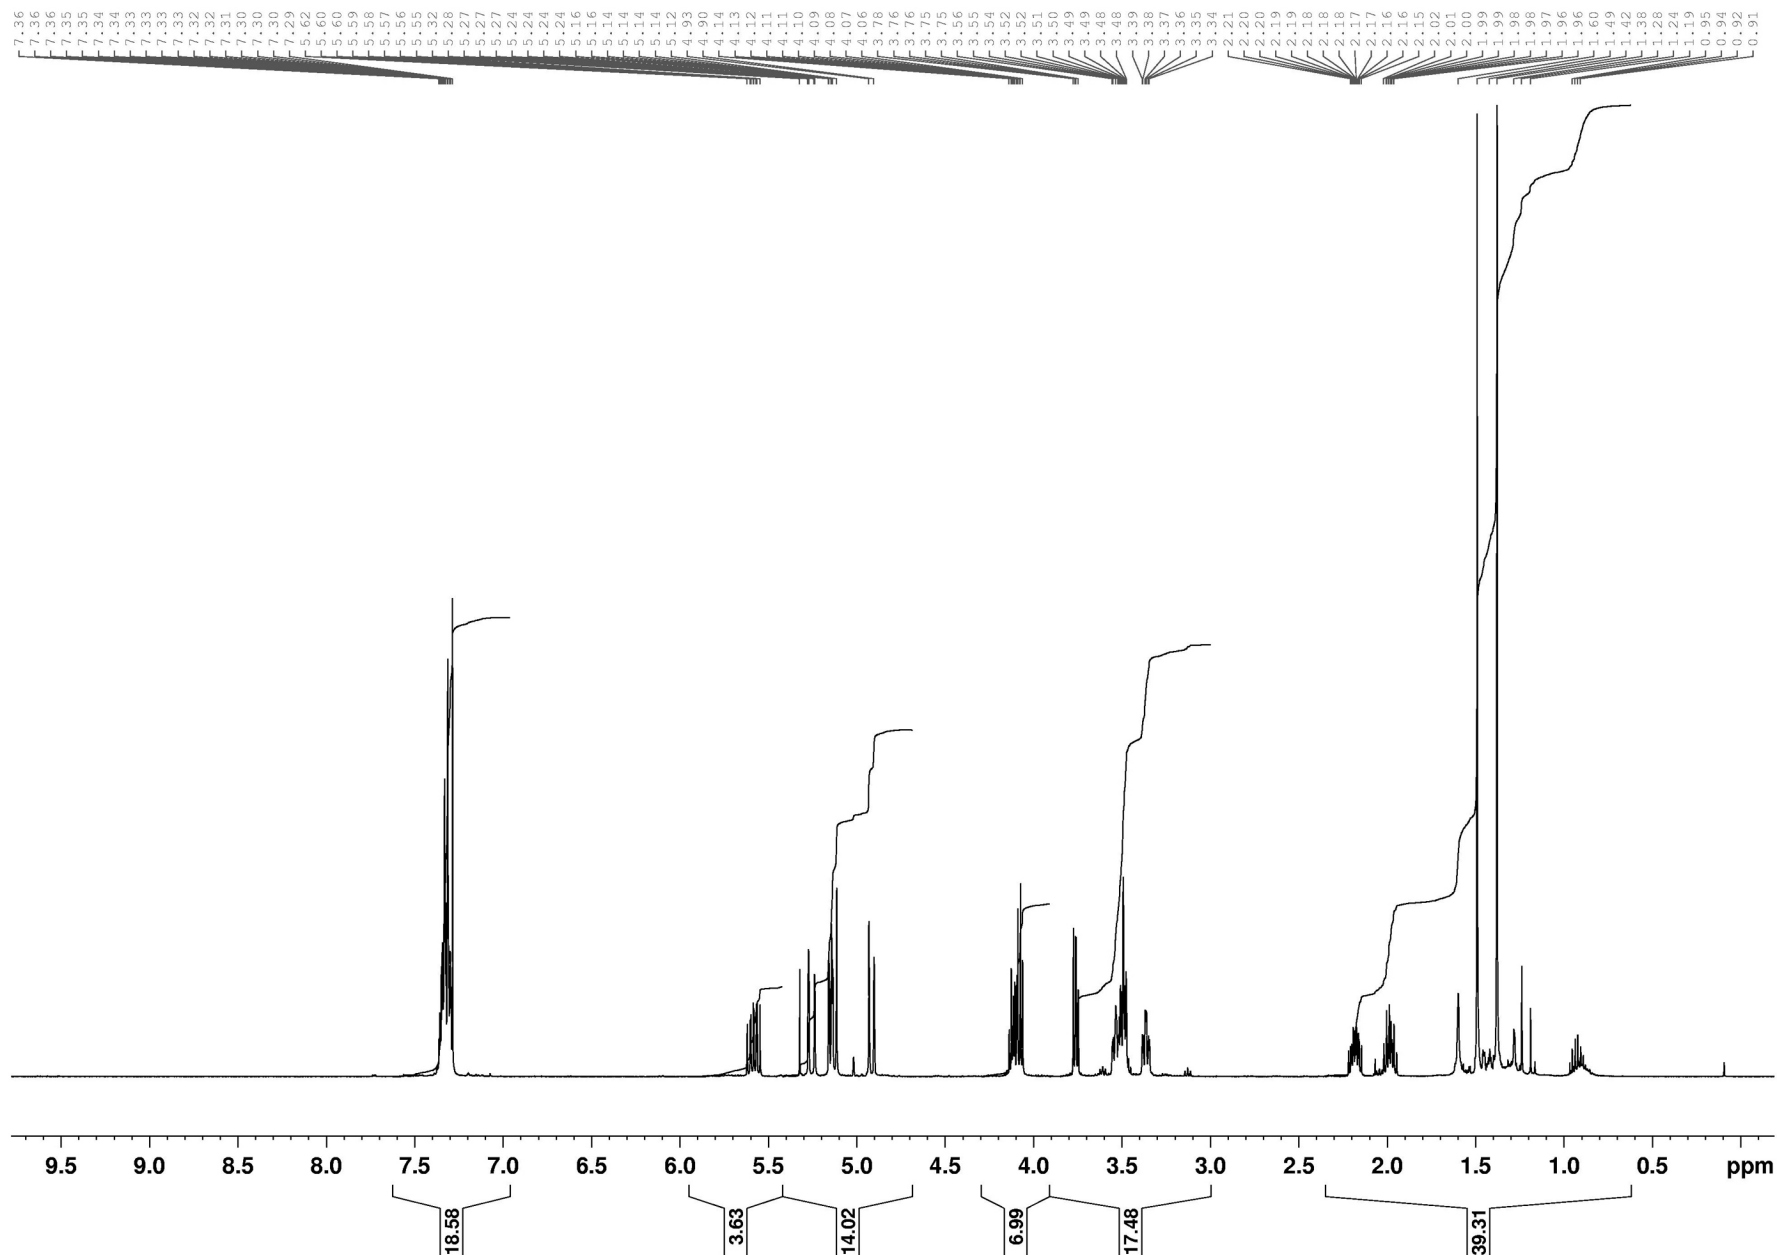

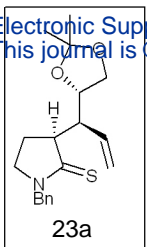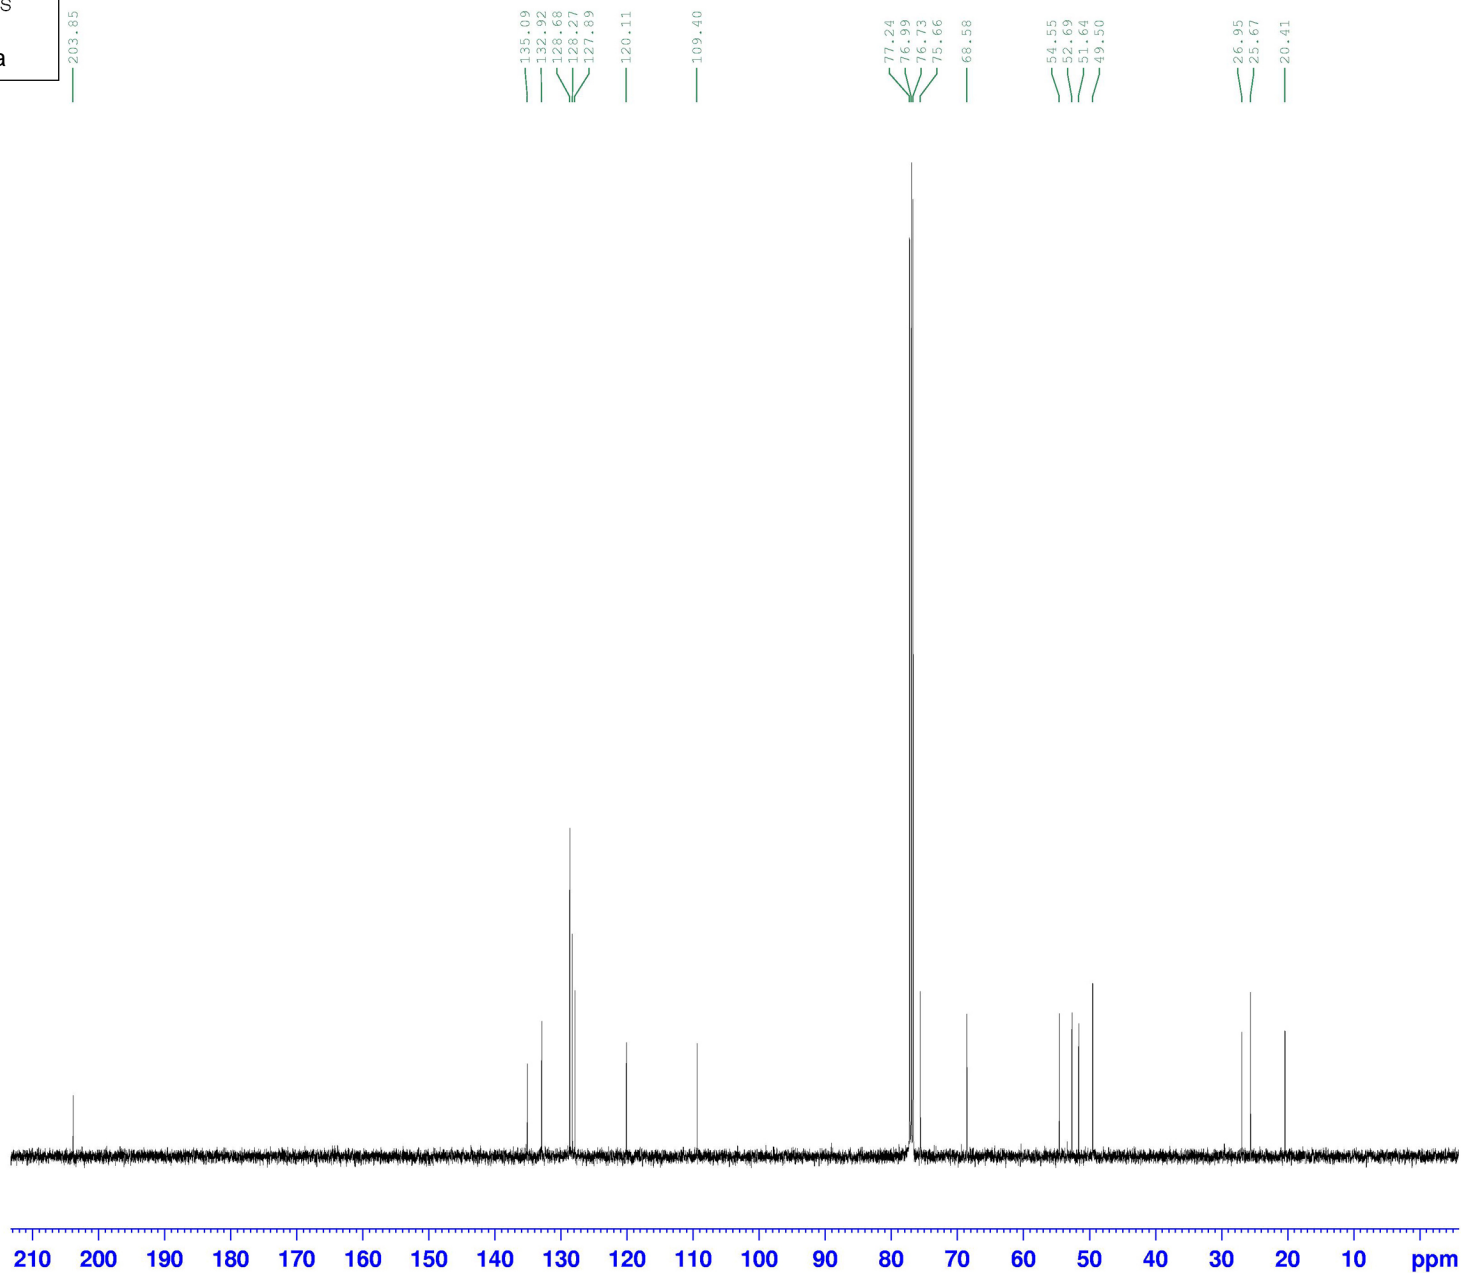

```

NAME           May19-2008
EXPNO          44
PROCNO         1
Date_          20080519
Time           19.01
INSTRUM        drx500
PROBHD         5 mm Multinu
PULPROG        zgpg30
TD             65536
SOLVENT        CDC13
NS             256
DS             4
SWH            31446.541 Hz
FIDRES         0.479836 Hz
AQ            1.0420883 sec
RG            8192
DW            15.900 usec
DE            6.00 usec
TE            300.0 K
D1            2.00000000 sec
d11           0.03000000 sec
d12           0.00002000 sec
    
```

```

===== CHANNEL f1 =====
NUC1           13C
P1            5.50 usec
PL1           0.00 dB
SFO1          125.7715719 MHz
    
```

```

===== CHANNEL f2 =====
CPDPRG2        waltz16
NUC2           1H
PCPD2          95.00 usec
PL2           0.00 dB
PL12          19.00 dB
PL13          19.00 dB
SFO2          500.1320005 MHz
SI            32768
SF            125.7577949 MHz
WDW            EM
SSB            0
LB            1.00 Hz
GB            0
PC            1.40
    
```

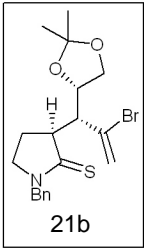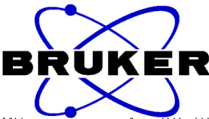

NAME Apr09-2008  
EXPNO 40  
PROCNO 1  
Date\_ 20080409  
Time 16.05  
INSTRUM drx500  
PROBHD 5 mm Multinu  
PULPROG zg30  
TD 82642  
SOLVENT CDC13  
NS 16  
DS 2  
SWH 10330.578 Hz  
FIDRES 0.125004 Hz  
AQ 3.9999712 sec  
RG 456.1  
DW 48.400 use  
DE 6.00 use  
TE 300.0 K  
D1 1.00000000 sec

===== CHANNEL f1 ===  
NUC1 1H  
P1 15.50 use  
PL1 0.00 dB  
SFO1 500.1330885 MHz  
SI 65536  
SF 500.1300174 MHz  
WDW EM  
SSB 0  
LB 0.30 Hz  
GB 0  
PC 1.00

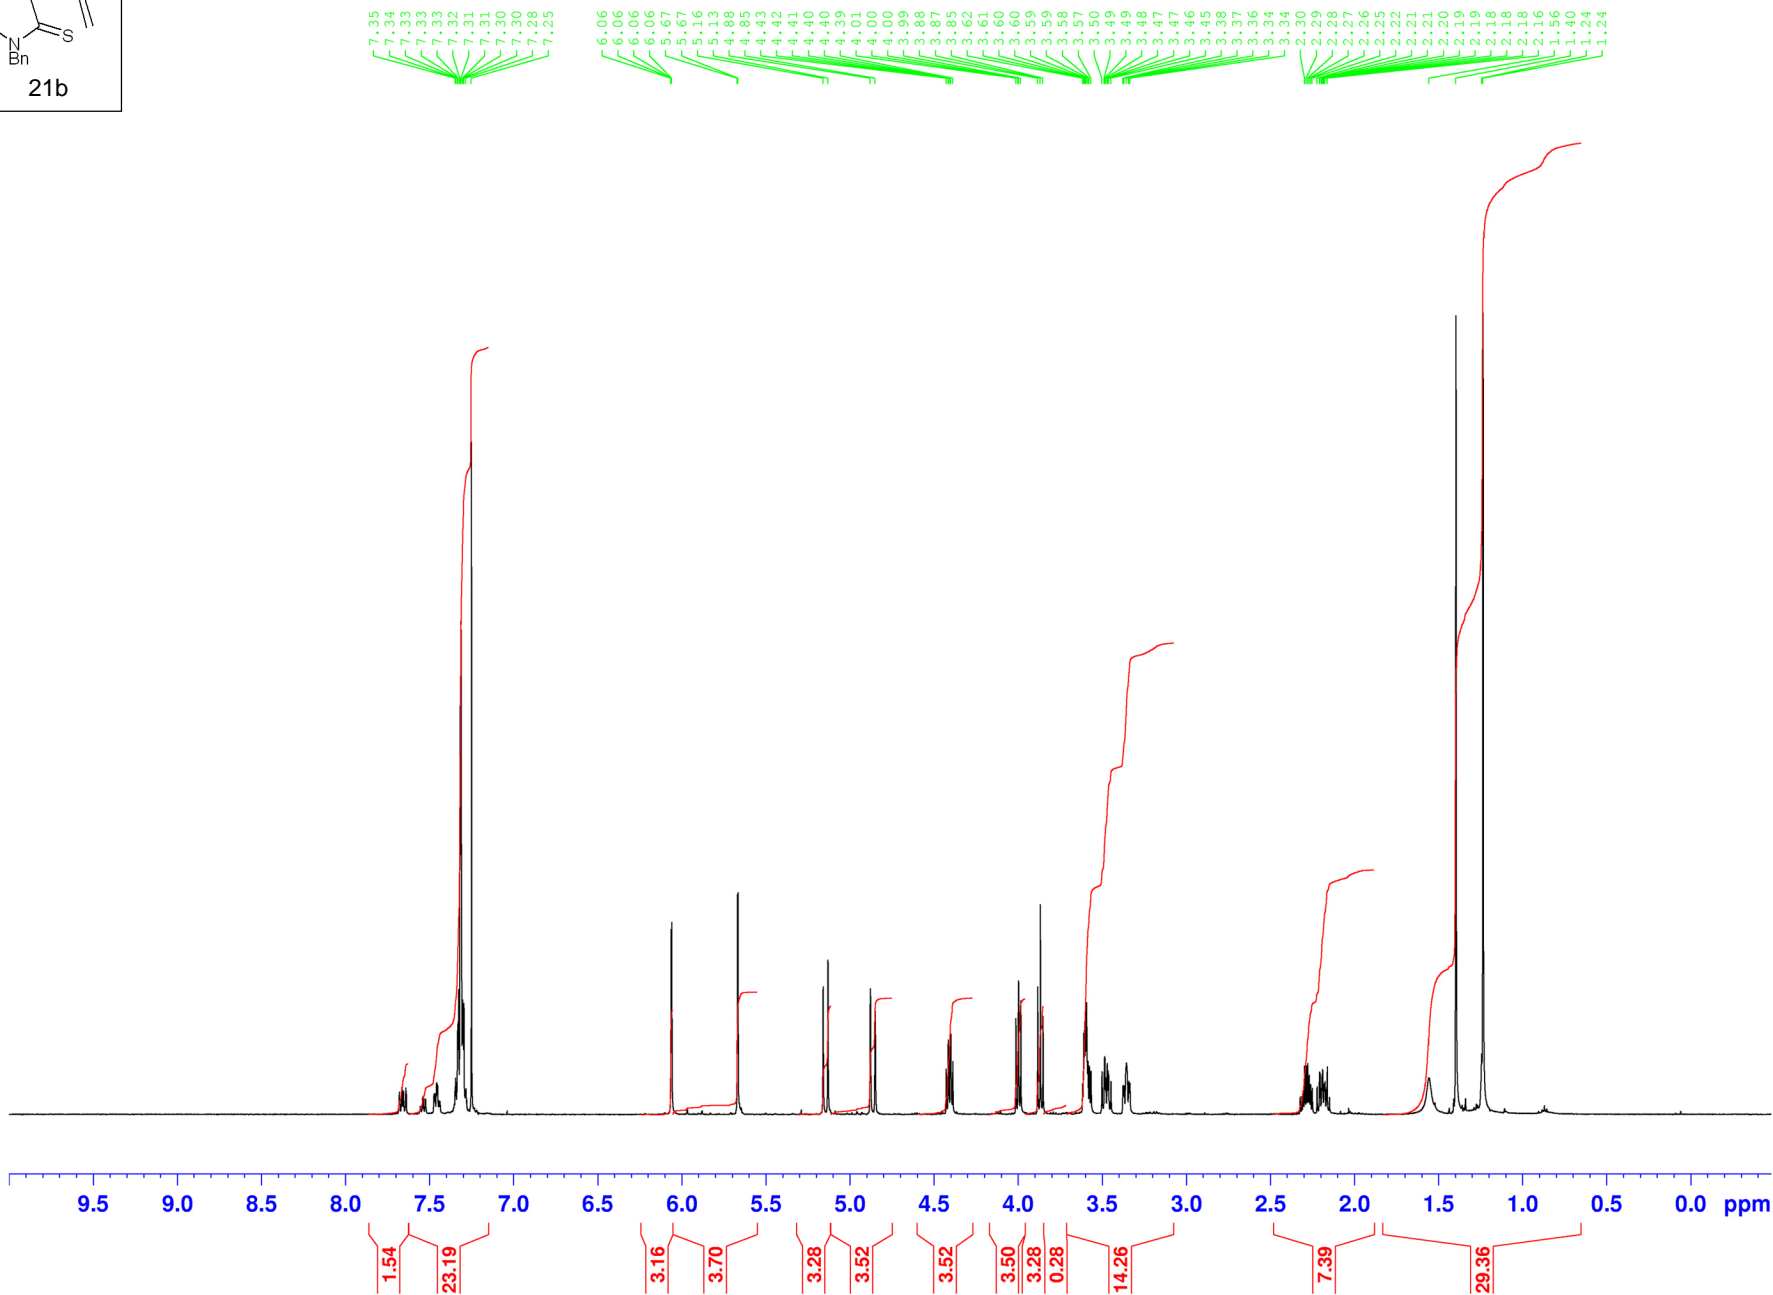

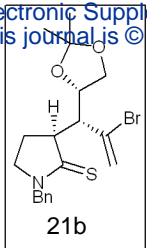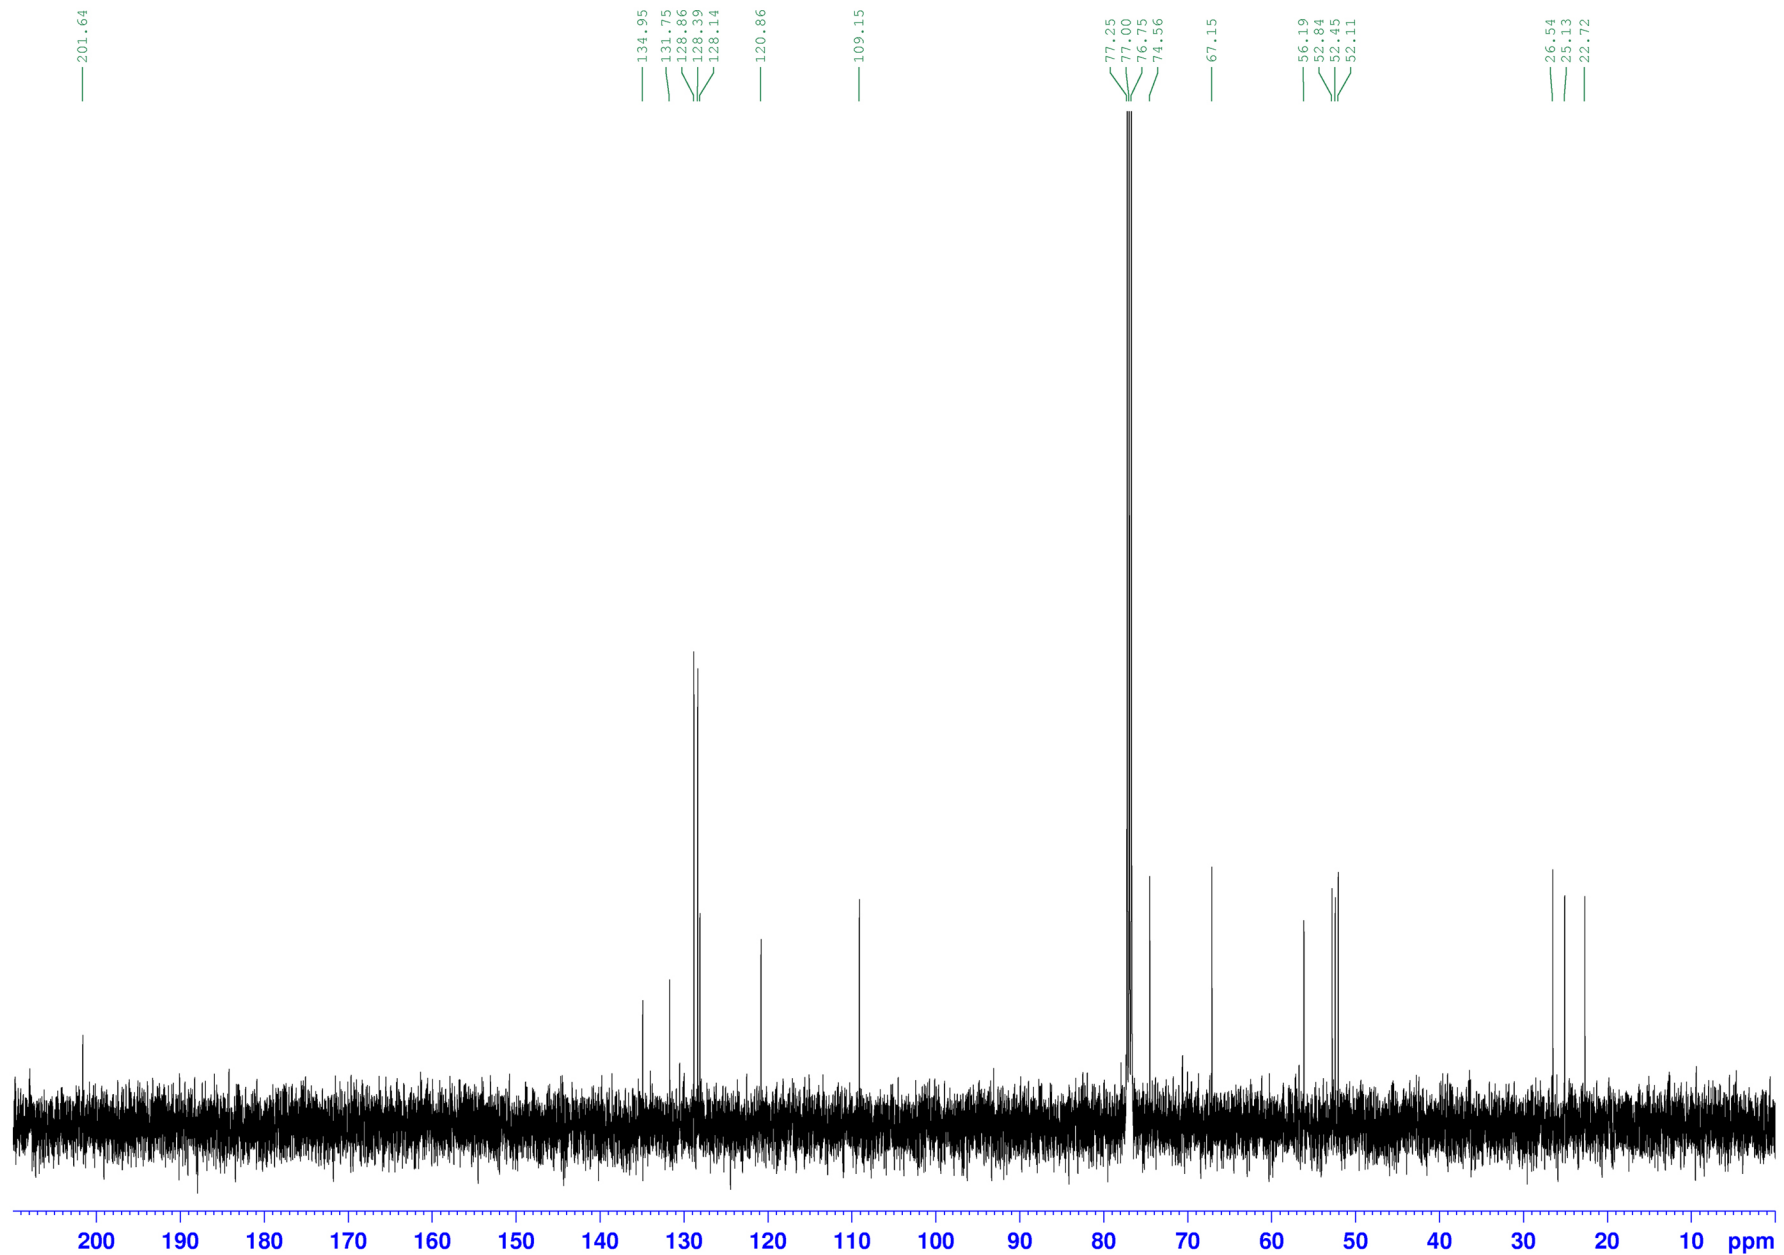

NAME ae066minor  
EXPNO 2  
PROCNO 1  
Date\_ 20080303  
Time 11.53  
INSTRUM drx500  
PROBHD 5 mm Multinu  
PULPROG zgpg30  
TD 65536  
SOLVENT CDCl3  
NS 146  
DS 4  
SWH 31446.541 Hz  
FIDRES 0.479836 Hz  
AQ 1.0420883 sec  
RG 3649.1  
DW 15.900 use  
DE 6.00 use  
TE 300.0 K  
D1 2.00000000 sec  
d11 0.03000000 sec  
d12 0.00002000 sec

===== CHANNEL f1 ===  
NUC1 13C  
P1 5.00 use  
PL1 0.00 dB  
SF01 125.7715719 MHz

===== CHANNEL f2 ===  
CPDPRG2 waltz16  
NUC2 1H  
PCPD2 95.00 use  
PL2 0.00 dB  
PL12 19.00 dB  
PL13 19.00 dB  
SF02 500.1320005 MHz  
SI 131072  
SF 125.7577913 MHz  
WDW EM  
SSB 0  
LB 1.00 Hz  
GB 0  
PC 1.40

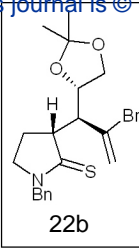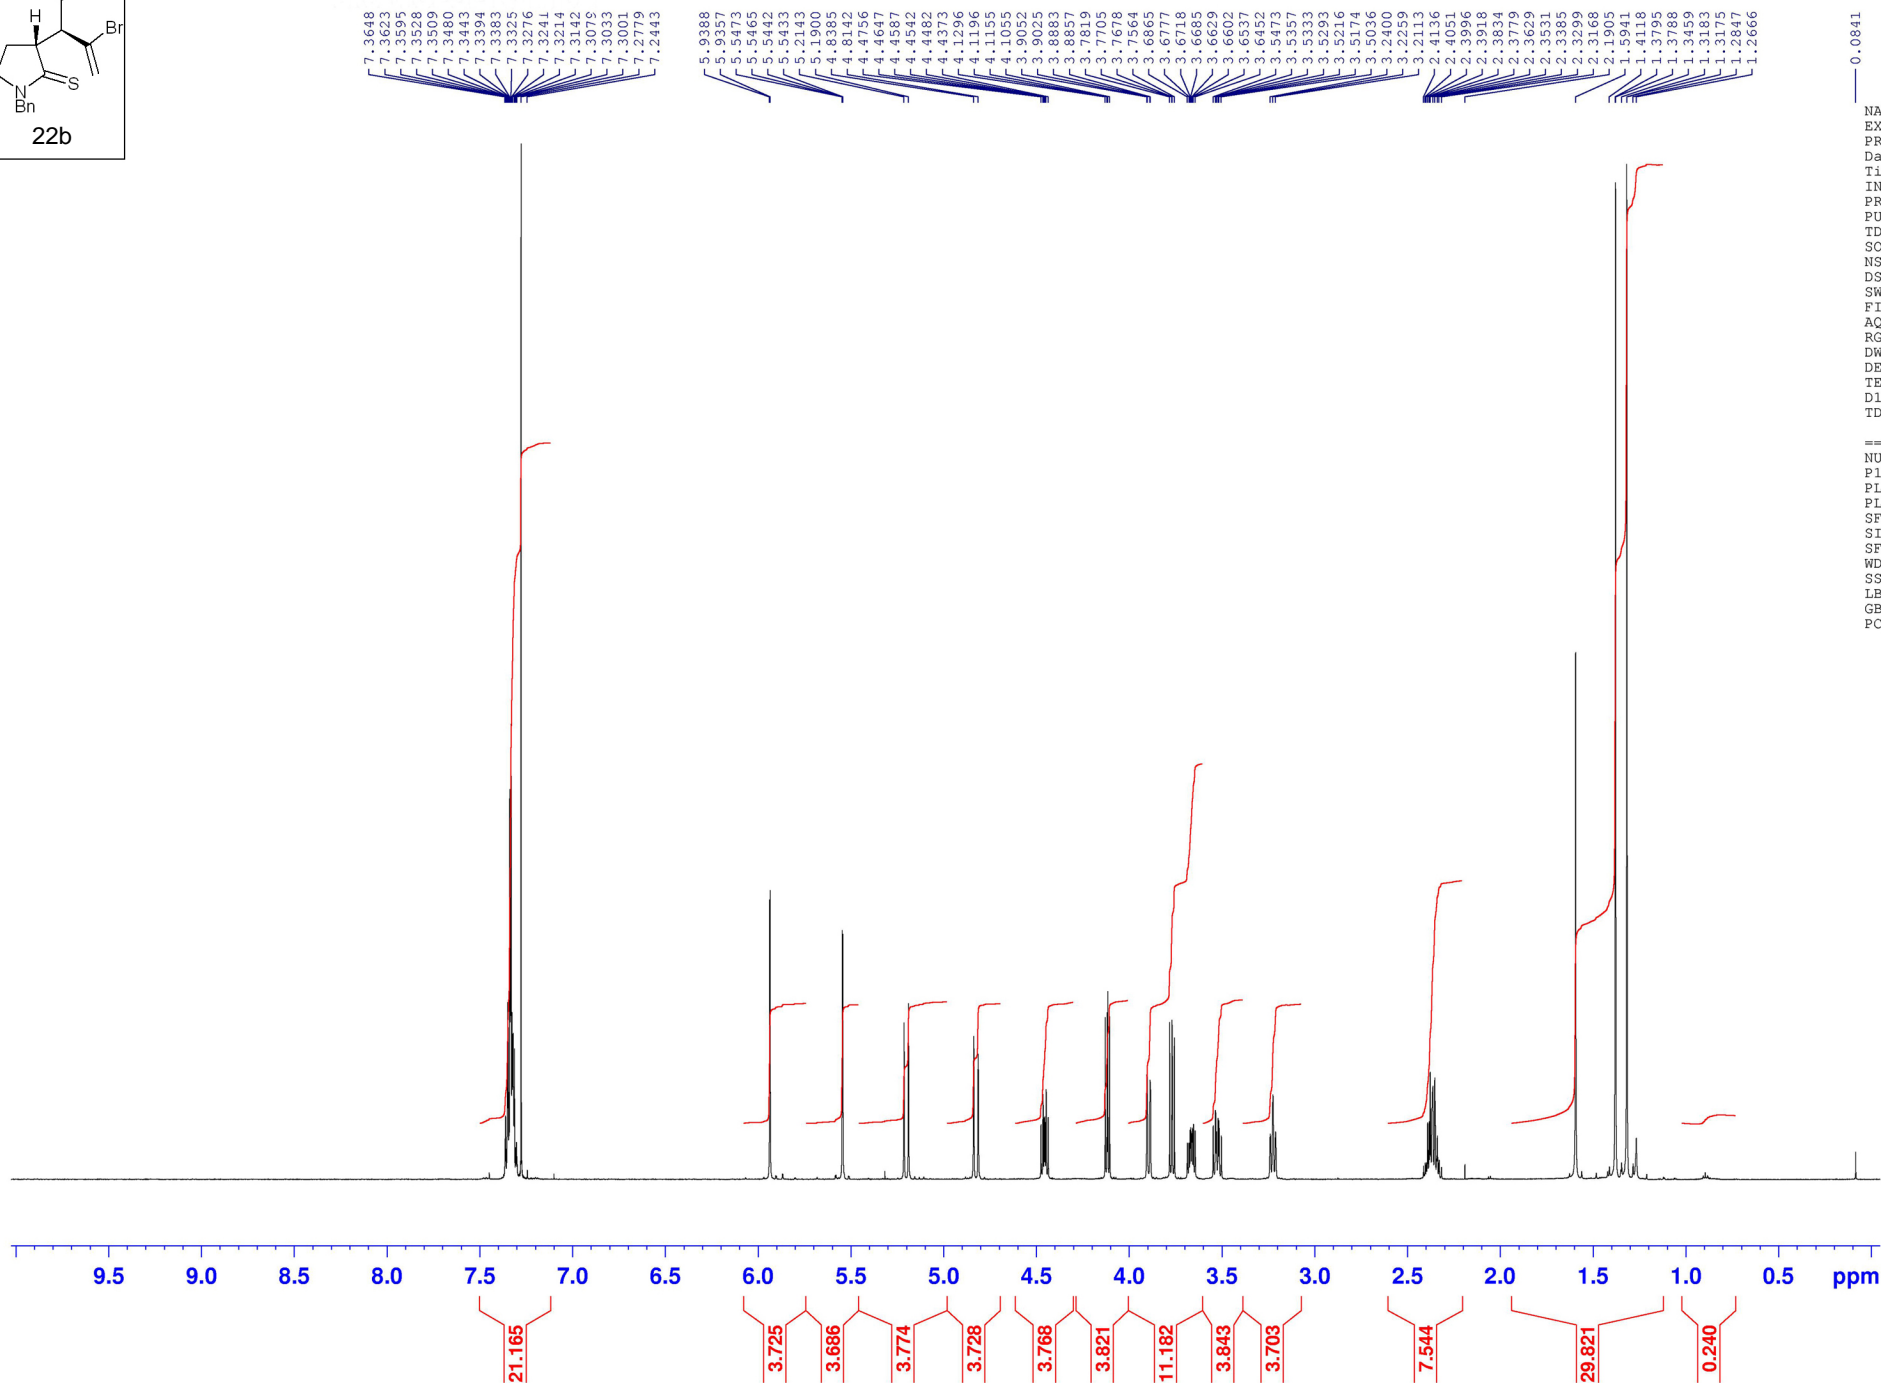

NAME May16-2008  
EXPNO 1  
PROCNO 1  
Date\_ 20080516  
Time 12.33  
INSTRUM AV600  
PROBHD 5 mm CPDCH 13C  
FULPROG zg30  
TD 65536  
SOLVENT CDCl3  
NS 16  
DS 0  
SWH 12335.526 H  
FIDRES 0.188225 H  
AQ 2.6564426 s  
RG 18  
DW 40.533 u  
DE 10.61 u  
TE 298.0 K  
D1 1.00000000 s  
TD0 1

===== CHANNEL f1 =====  
NUC1 1H  
P1 10.80 u  
PL1 1.00 d  
PL1W 13.76731014 W  
SFO1 600.1337061 M  
SI 131072  
SF 600.1300000 M  
WDW no  
SSB no  
LB 0.00 H  
GB 0  
PC 22.00

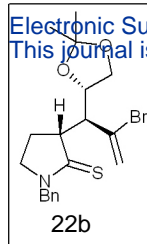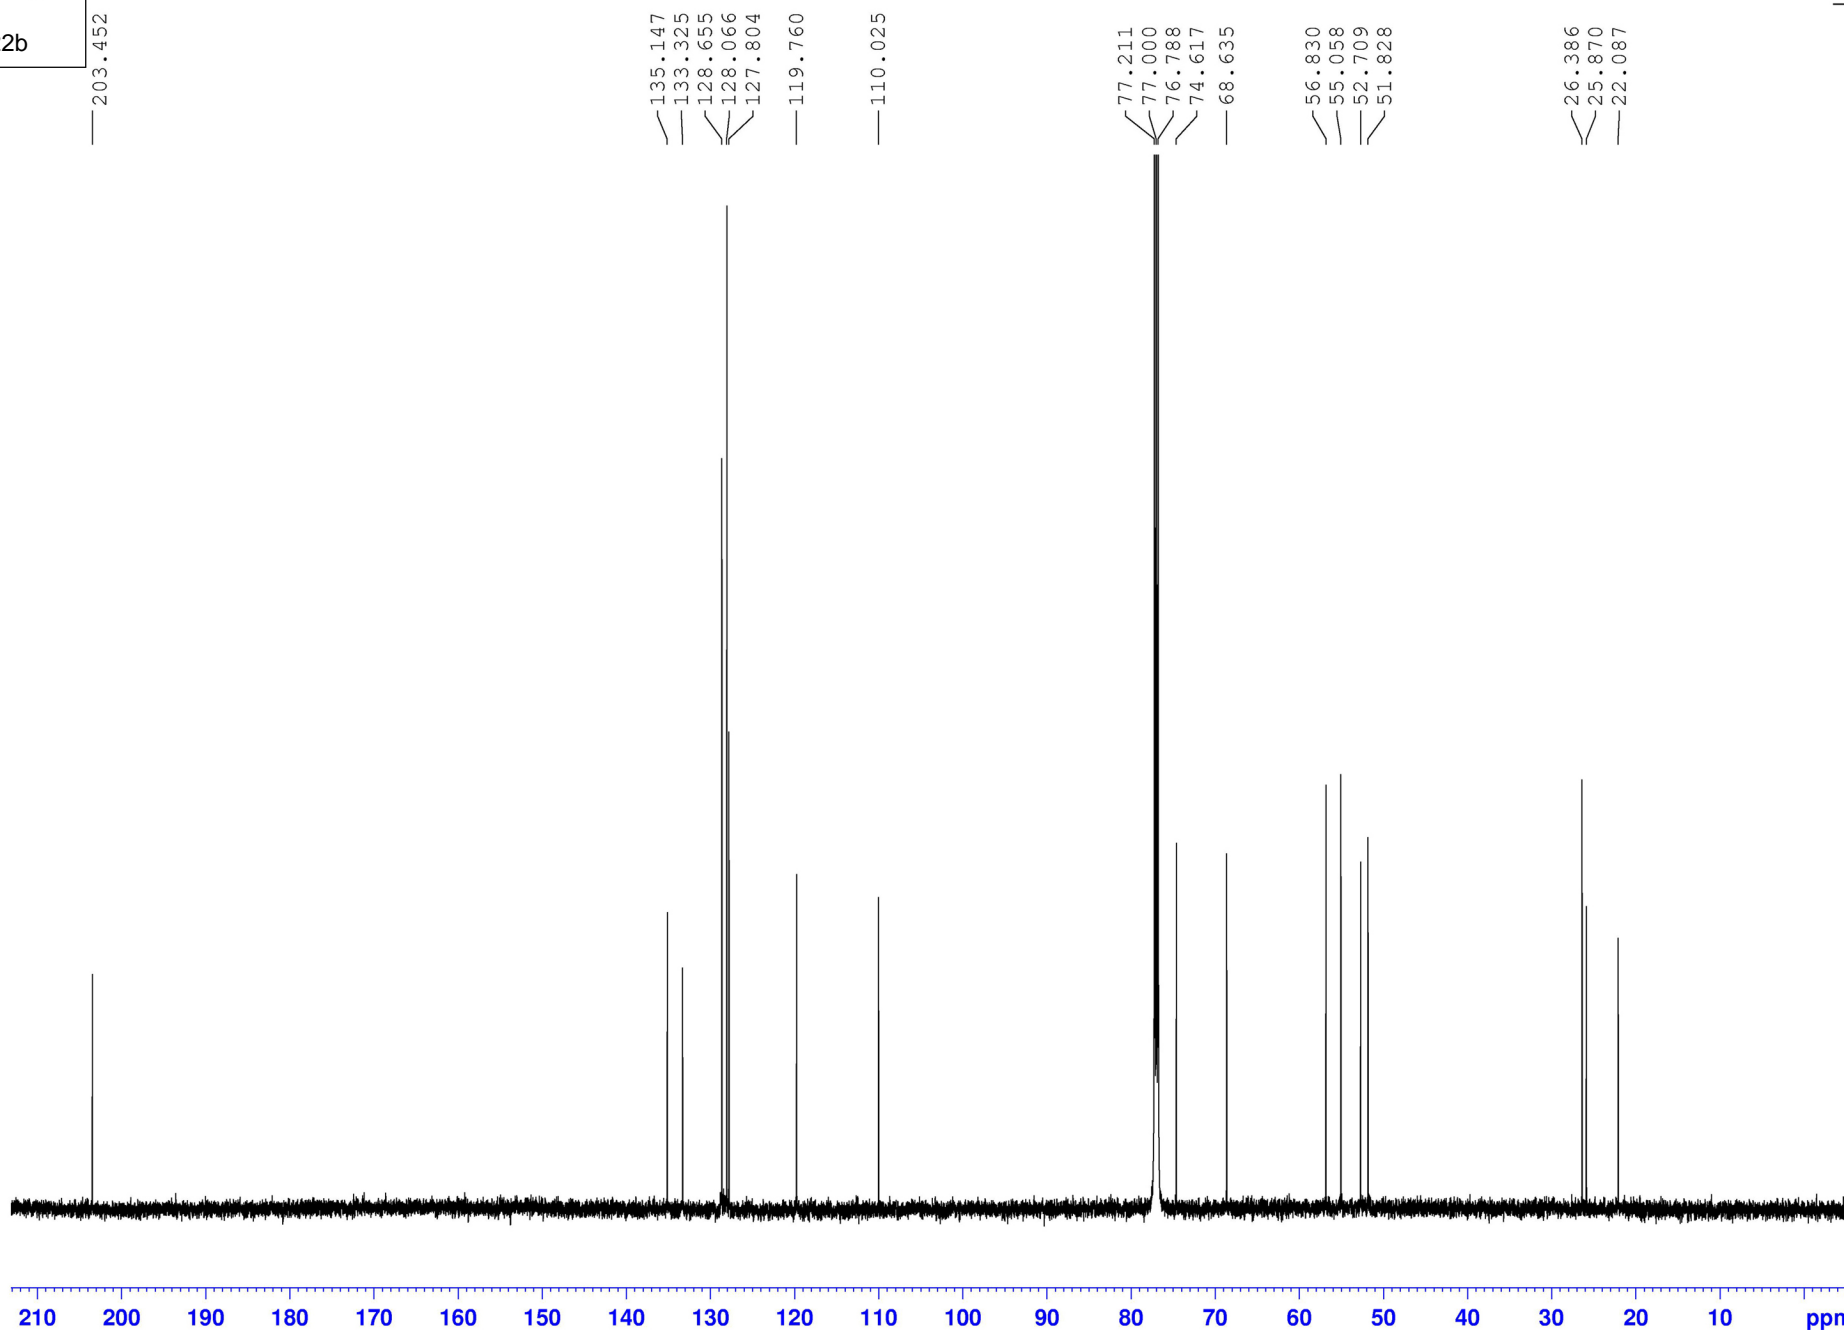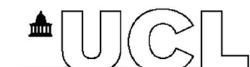

```

NAME          May16-2008
EXPNO         2
PROCNO        1
Date_         20080516
Time          12.40
INSTRUM       AV600
PROBHD        5 mm CPDCH 13C
PULPROG       zgpg30
TD            65536
SOLVENT       CDCl3
NS            128
DS            0
SWH           36057.691 H
FIDRES        0.550197 H
AQ            0.9088159 s
RG            1030
DW            13.867 u
DE            21.55 u
TE            298.0 K
D1            2.00000000 s
D11           0.03000000 s
TD0           1
    
```

```

===== CHANNEL f1 =====
NUC1          13C
P1            9.80 u
PL1           5.00 d
PL1W          26.76886177 W
SFO1          150.9178981 M
    
```

```

===== CHANNEL f2 =====
CPDPRG2       waltz16
NUC2          1H
PCPD2         70.00 u
PL2           1.00 d
PL12          17.23 d
PL13          120.00 d
PL2W          13.76731014 W
PL12W         0.32798135 W
PL13W         0.00000000 W
SFO2          600.1324005 M
S1            32768
SF            150.9028140 M
WDW           EM
SSB           0
LB            1.00 H
GB            0
PC            1.40
    
```

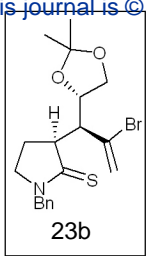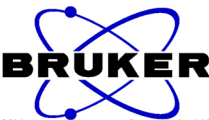

NAME Apr23-2008  
EXPNO 60  
PROCNO 1  
Date\_ 20080423  
Time 11.13  
INSTRUM drx500  
PROBHD 5 mm Multinu  
PULPROG zg30  
TD 82642  
SOLVENT CDC13  
NS 16  
DS 2  
SWH 10330.578 Hz  
FIDRES 0.125004 Hz  
AQ 3.9999712 sec  
RG 287.4  
DW 48.400 use  
DE 6.00 use  
TE 300.0 K  
D1 1.00000000 sec

===== CHANNEL f1 =====  
NUC1 1H  
P1 15.50 use  
PL1 0.00 dB  
SFO1 500.1330885 MHz  
SI 65536  
SF 500.1300145 MHz  
WDW no  
SSB 0  
LB 0.00 Hz  
GB 0  
PC 1.00

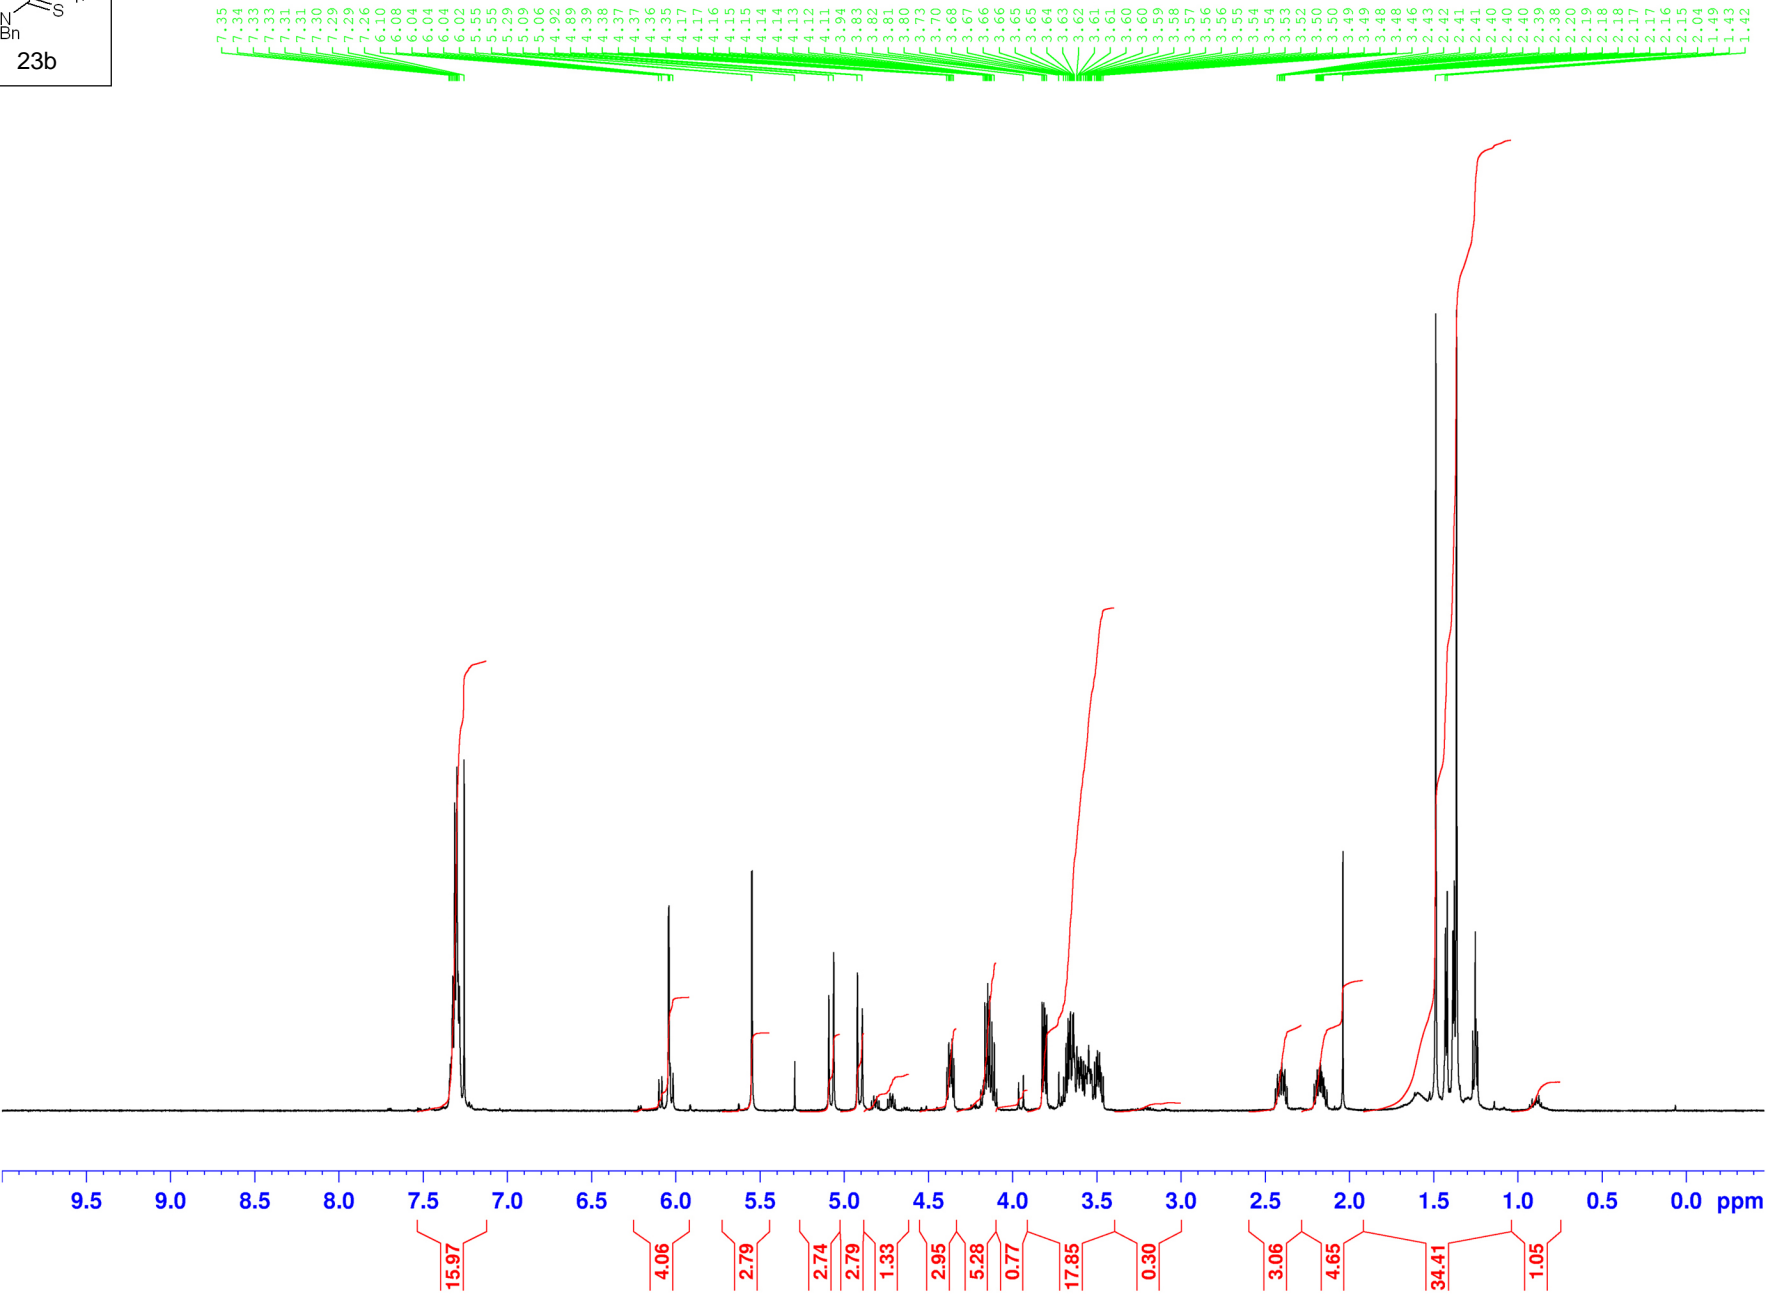

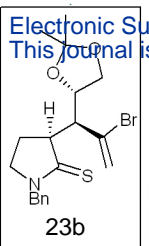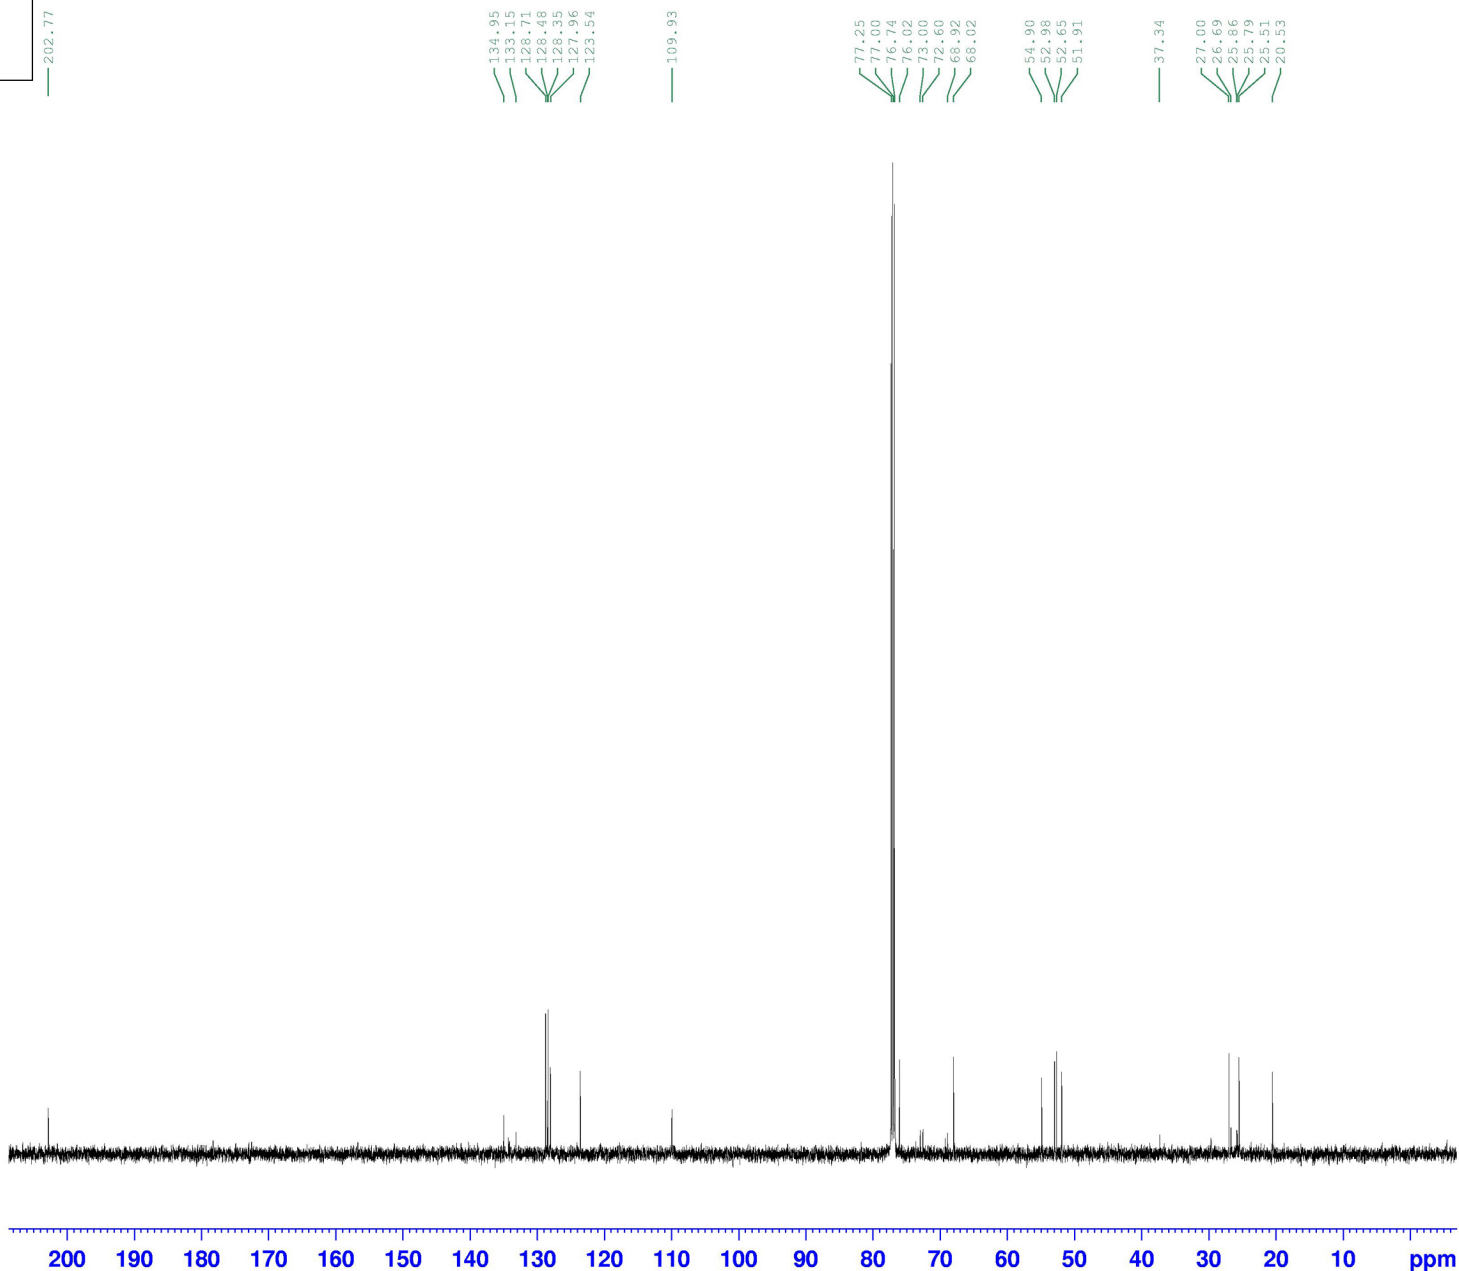

NAME Apr23-2008  
EXPNO 84  
PROCNO 1  
Date\_ 20080423  
Time 13.42  
INSTRUM drx500  
PROBHD 5 mm Multinu  
PULPROG zgpg30  
TD 65536  
SOLVENT CDCl3  
NS 256  
DS 4  
SWH 31446.541 Hz  
FIDRES 0.479836 Hz  
AQ 1.0420883 sec  
RG 3649.1  
DW 15.900 usec  
DE 6.00 usec  
TE 300.0 K  
D1 2.00000000 sec  
d11 0.03000000 sec  
d12 0.00002000 sec

===== CHANNEL f1 =====  
NUC1 13C  
P1 5.50 usec  
PL1 0.00 dB  
SFO1 125.7715719 MHz

===== CHANNEL f2 =====  
CPDPRG2 waltz16  
NUC2 1H  
PCPD2 95.00 usec  
PL2 0.00 dB  
PL12 19.00 dB  
PL13 19.00 dB  
SFO2 500.1320005 MHz  
SI 32768  
SF 125.7577925 MHz  
WDW EM  
SSB 0  
LB 1.00 Hz  
GB 0  
PC 1.40

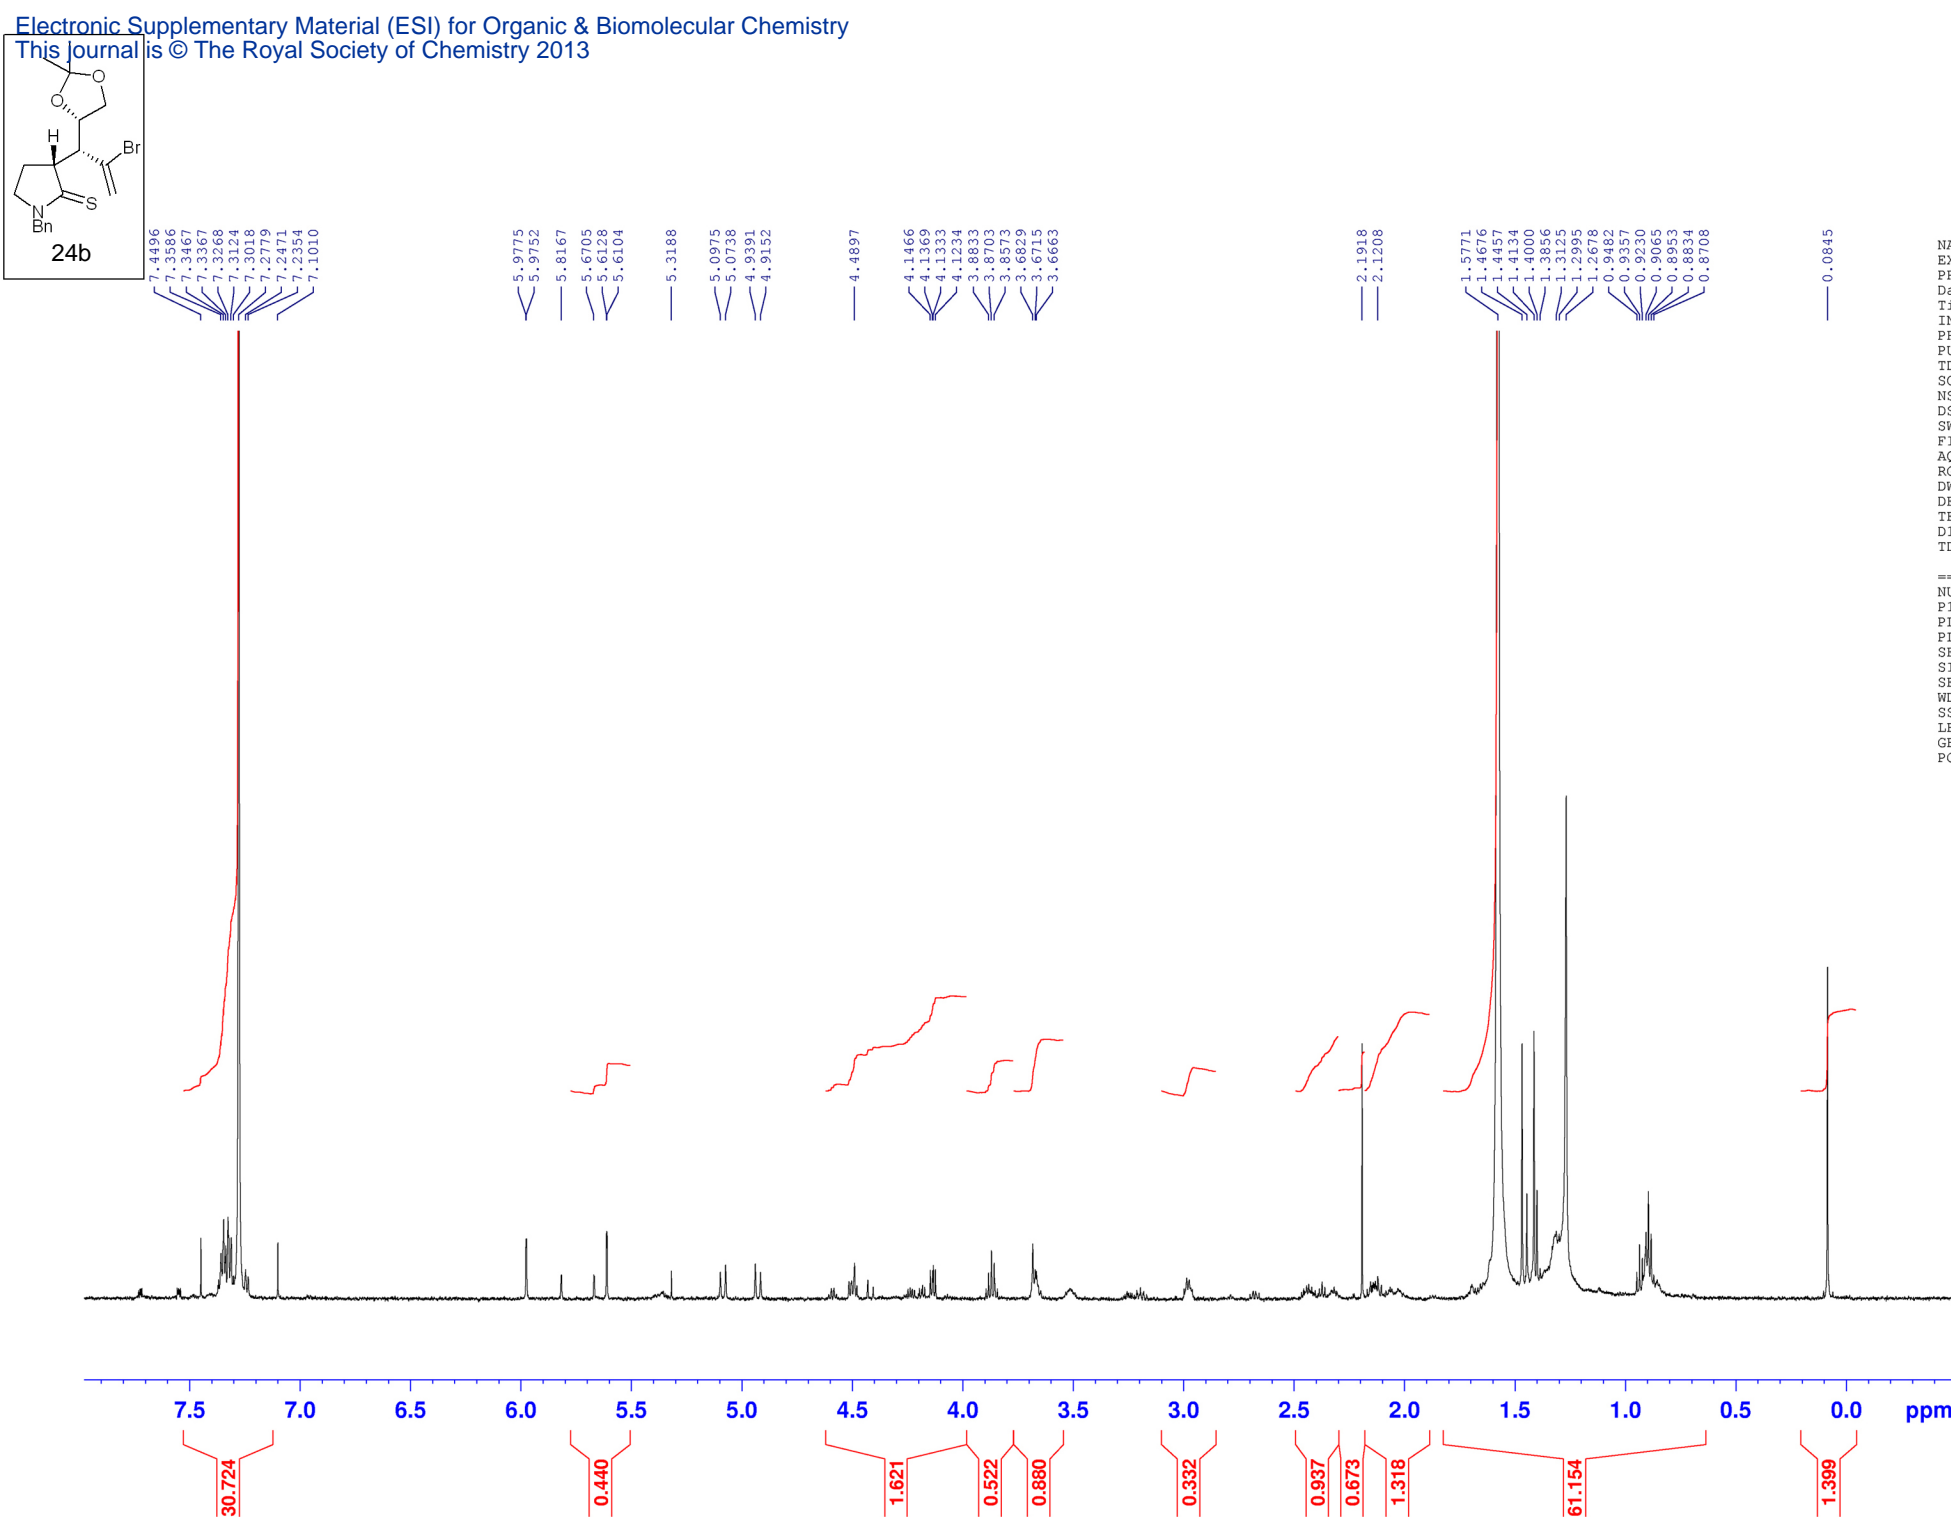

```

NAME          ae098
EXPNO         1
PROCNO        1
Date_         20080421
Time          19.24
INSTRUM       AV600
PROBHD        5 mm CPDCH 13C
PULPROG       zg30
TD            65536
SOLVENT       CDCl3
NS            16
DS            0
SWH           12335.526 H
FIDRES        0.188225 H
AQ            2.6564426 s
RG            28.5
DW            40.533 u
DE            10.61 u
TE            298.0 K
D1            1.00000000 s
TD0           1

===== CHANNEL f1 =====
NUC1          1H
P1            10.80 u
PL1           1.00 d
PL1W          13.76731014 W
SFO1          600.1337061 M
SI            32768
SF            600.1300000 M
WDW           EM
SSB           0
LB            0.30 H
GB            0
PC            1.40
    
```

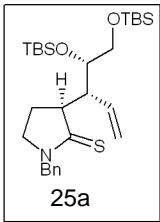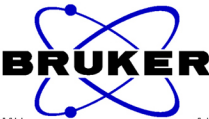

NAME AE39  
EXPNO 1  
PROCNO 1  
Date\_ 20070207  
Time 8.22  
INSTRUM drx500  
PROBHD 5 mm Multinu  
PULPROG zg30  
TD 82642  
SOLVENT CDC13  
NS 16  
DS 2  
SWH 10330.578 Hz  
FIDRES 0.125004 Hz  
AQ 3.9999712 sec  
RG 456.1  
DW 48.400 use  
DE 6.00 use  
TE 300.0 K  
D1 1.00000000 sec  
  
===== CHANNEL f1 =====  
NUC1 1H  
P1 14.80 use  
PL1 0.00 dB  
SFO1 500.1330885 MHz  
SI 131072  
SF 500.1300000 MHz  
WDW EM  
SSB 0  
LB 0.30 Hz  
GB 0  
PC 22.00

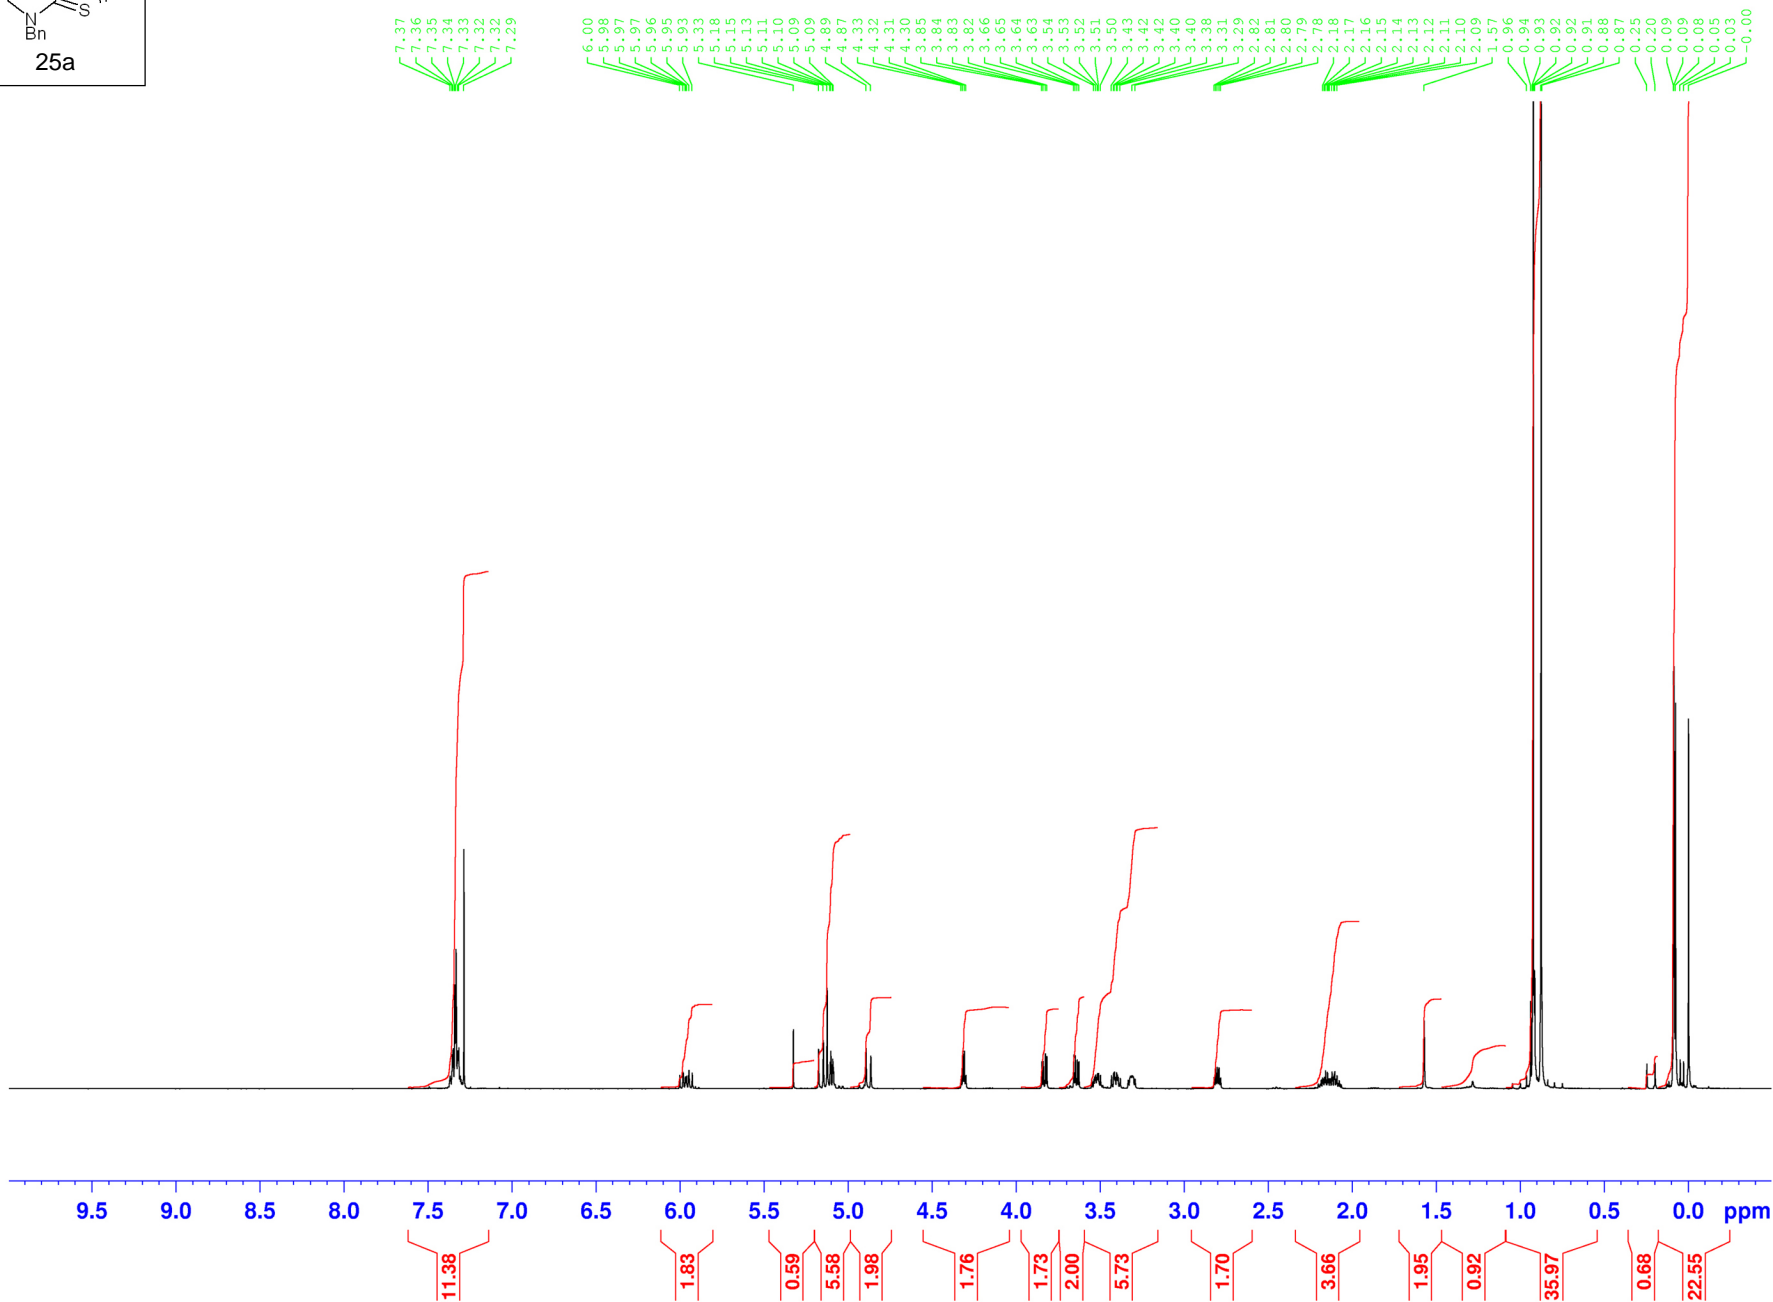

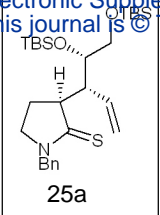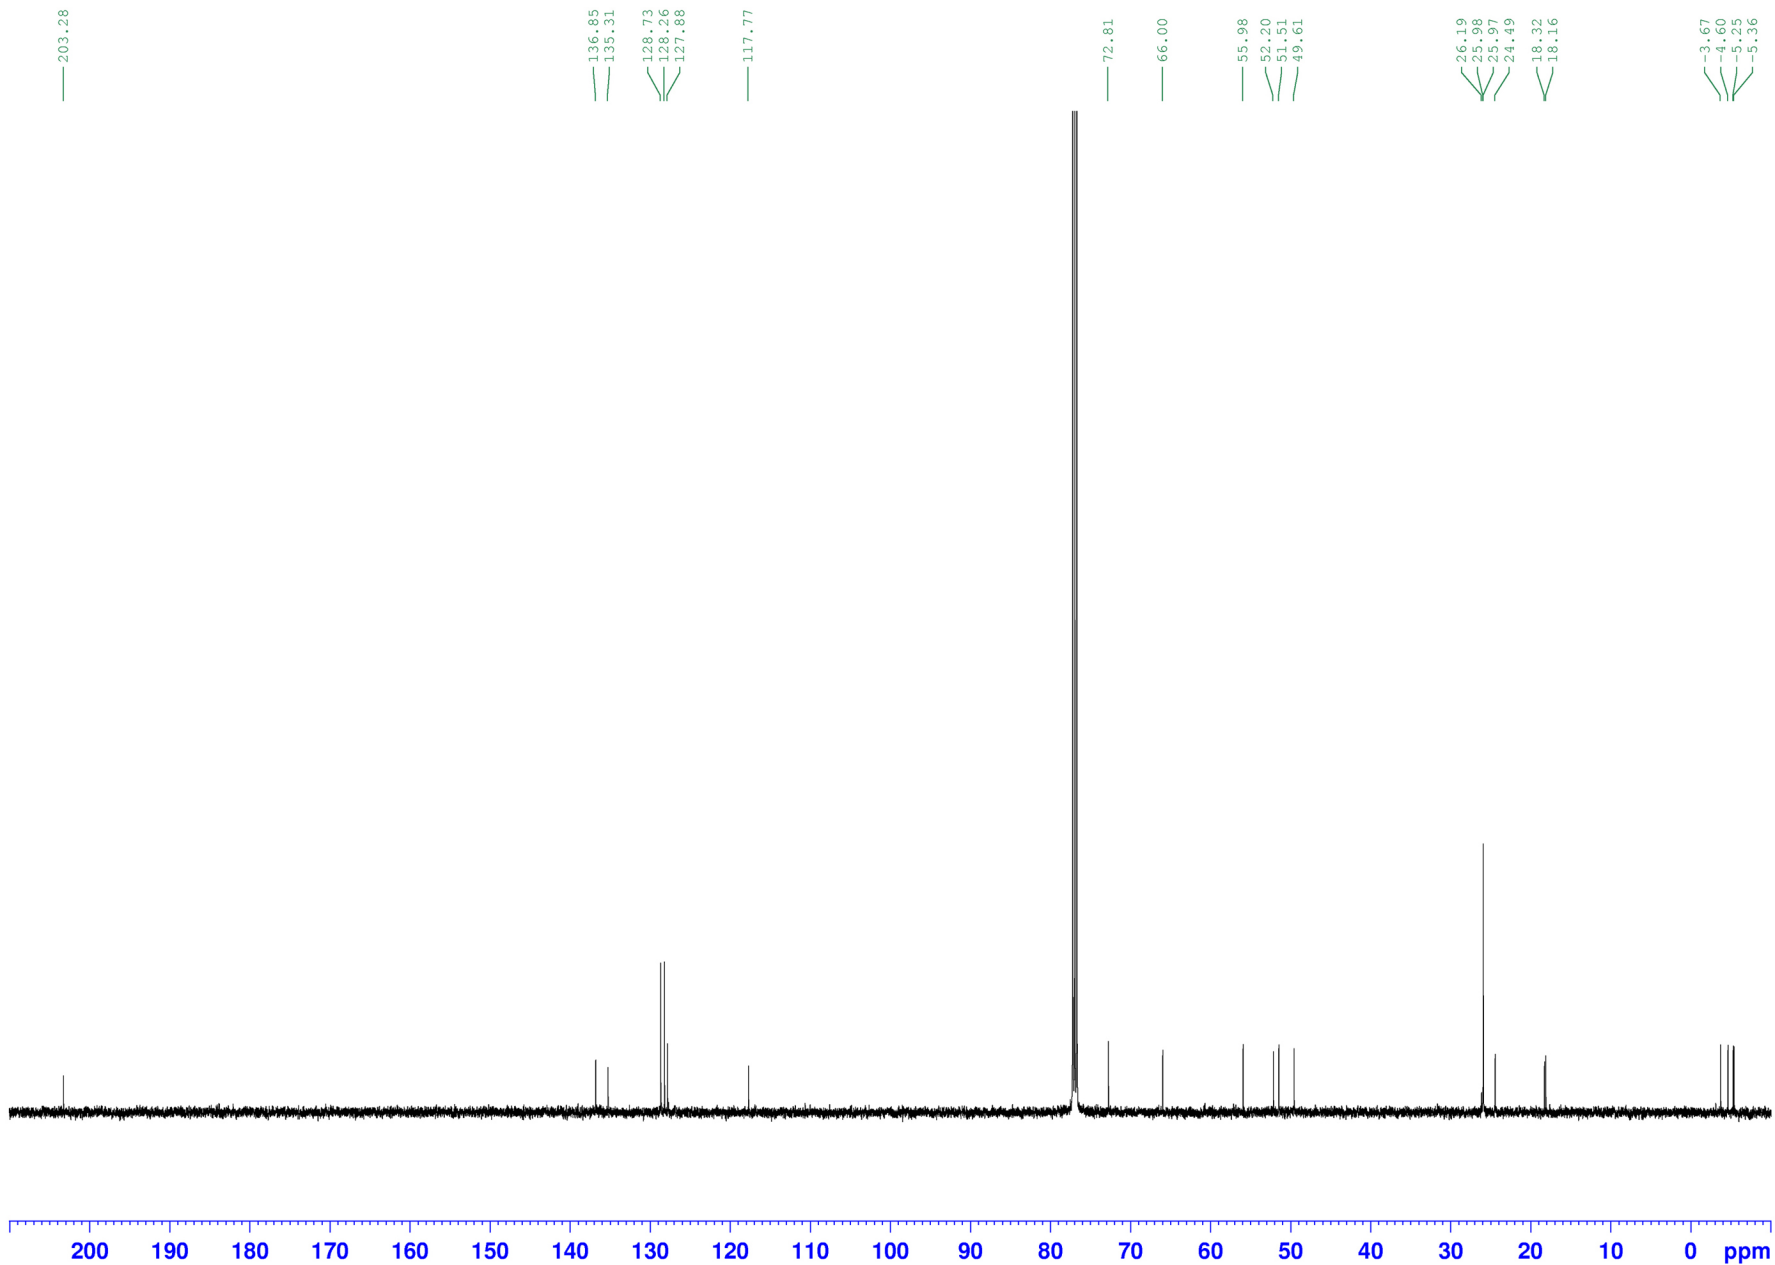

NAME AE39  
EXPNO 2  
PROCNO 1  
Date\_ 20070207  
Time 9.03  
INSTRUM drx500  
PROBHD 5 mm Multinu  
PULPROG zgpg30  
TD 65536  
SOLVENT CDCl3  
NS 1076  
DS 4  
SWH 31446.541 Hz  
FIDRES 0.479836 Hz  
AQ 1.0420883 sec  
RG 4597.6  
DW 15.900 use  
DE 6.00 use  
TE 300.0 K  
D1 2.00000000 sec  
d11 0.03000000 sec  
d12 0.00002000 sec

===== CHANNEL f1 =====  
NUC1 13C  
P1 5.10 use  
PL1 0.00 dB  
SF01 125.7715719 MHz

===== CHANNEL f2 =====  
CPDPRG2 waltz16  
NUC2 1H  
PCPD2 95.00 use  
PL2 0.00 dB  
PL12 19.00 dB  
PL13 19.00 dB  
SF02 500.1320005 MHz  
SI 131072  
SF 125.7577919 MHz  
WDW EM  
SSB 0  
LB 1.00 Hz  
GB 0  
PC 1.40

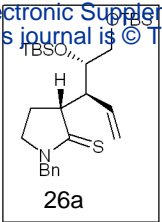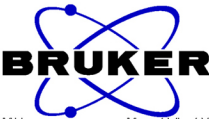

NAME May24-2008  
EXPNO 20  
PROCNO 1  
Date\_ 20080525  
Time 11.59  
INSTRUM drx500  
PROBHD 5 mm Multinu  
PULPROG zg30  
TD 82642  
SOLVENT CDC13  
NS 16  
DS 2  
SWH 10330.578 Hz  
FIDRES 0.125004 Hz  
AQ 3.9999712 sec  
RG 322.5  
DW 48.400 use  
DE 6.00 use  
TE 300.0 K  
D1 1.00000000 sec

===== CHANNEL f1 ===  
NUC1 1H  
P1 15.50 use  
PL1 0.00 dB  
SFO1 500.1330885 MHz  
SI 65536  
SF 500.1300137 MHz  
WDW EM  
SSB 0  
LB 0.33 Hz  
GB 0  
PC 1.00

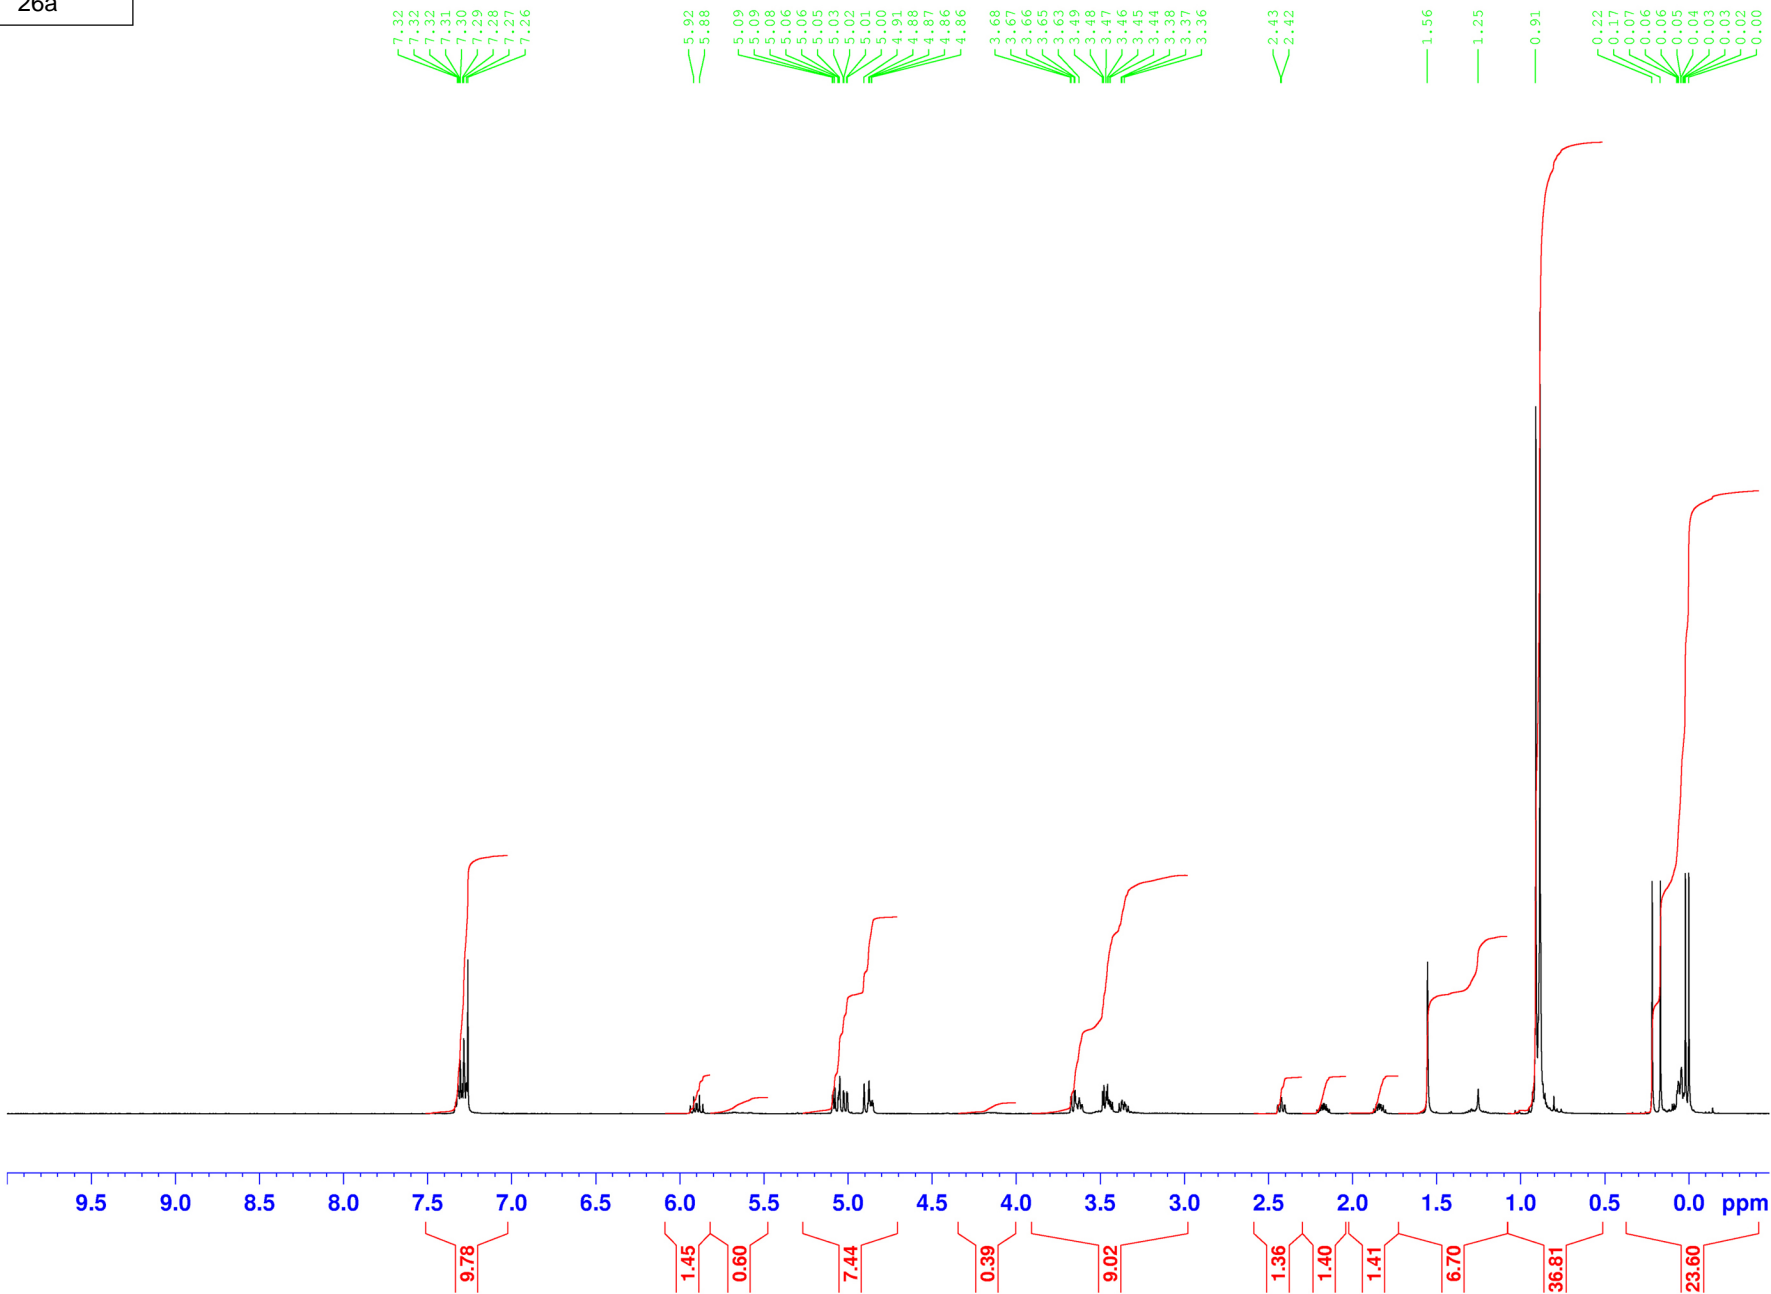

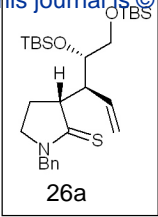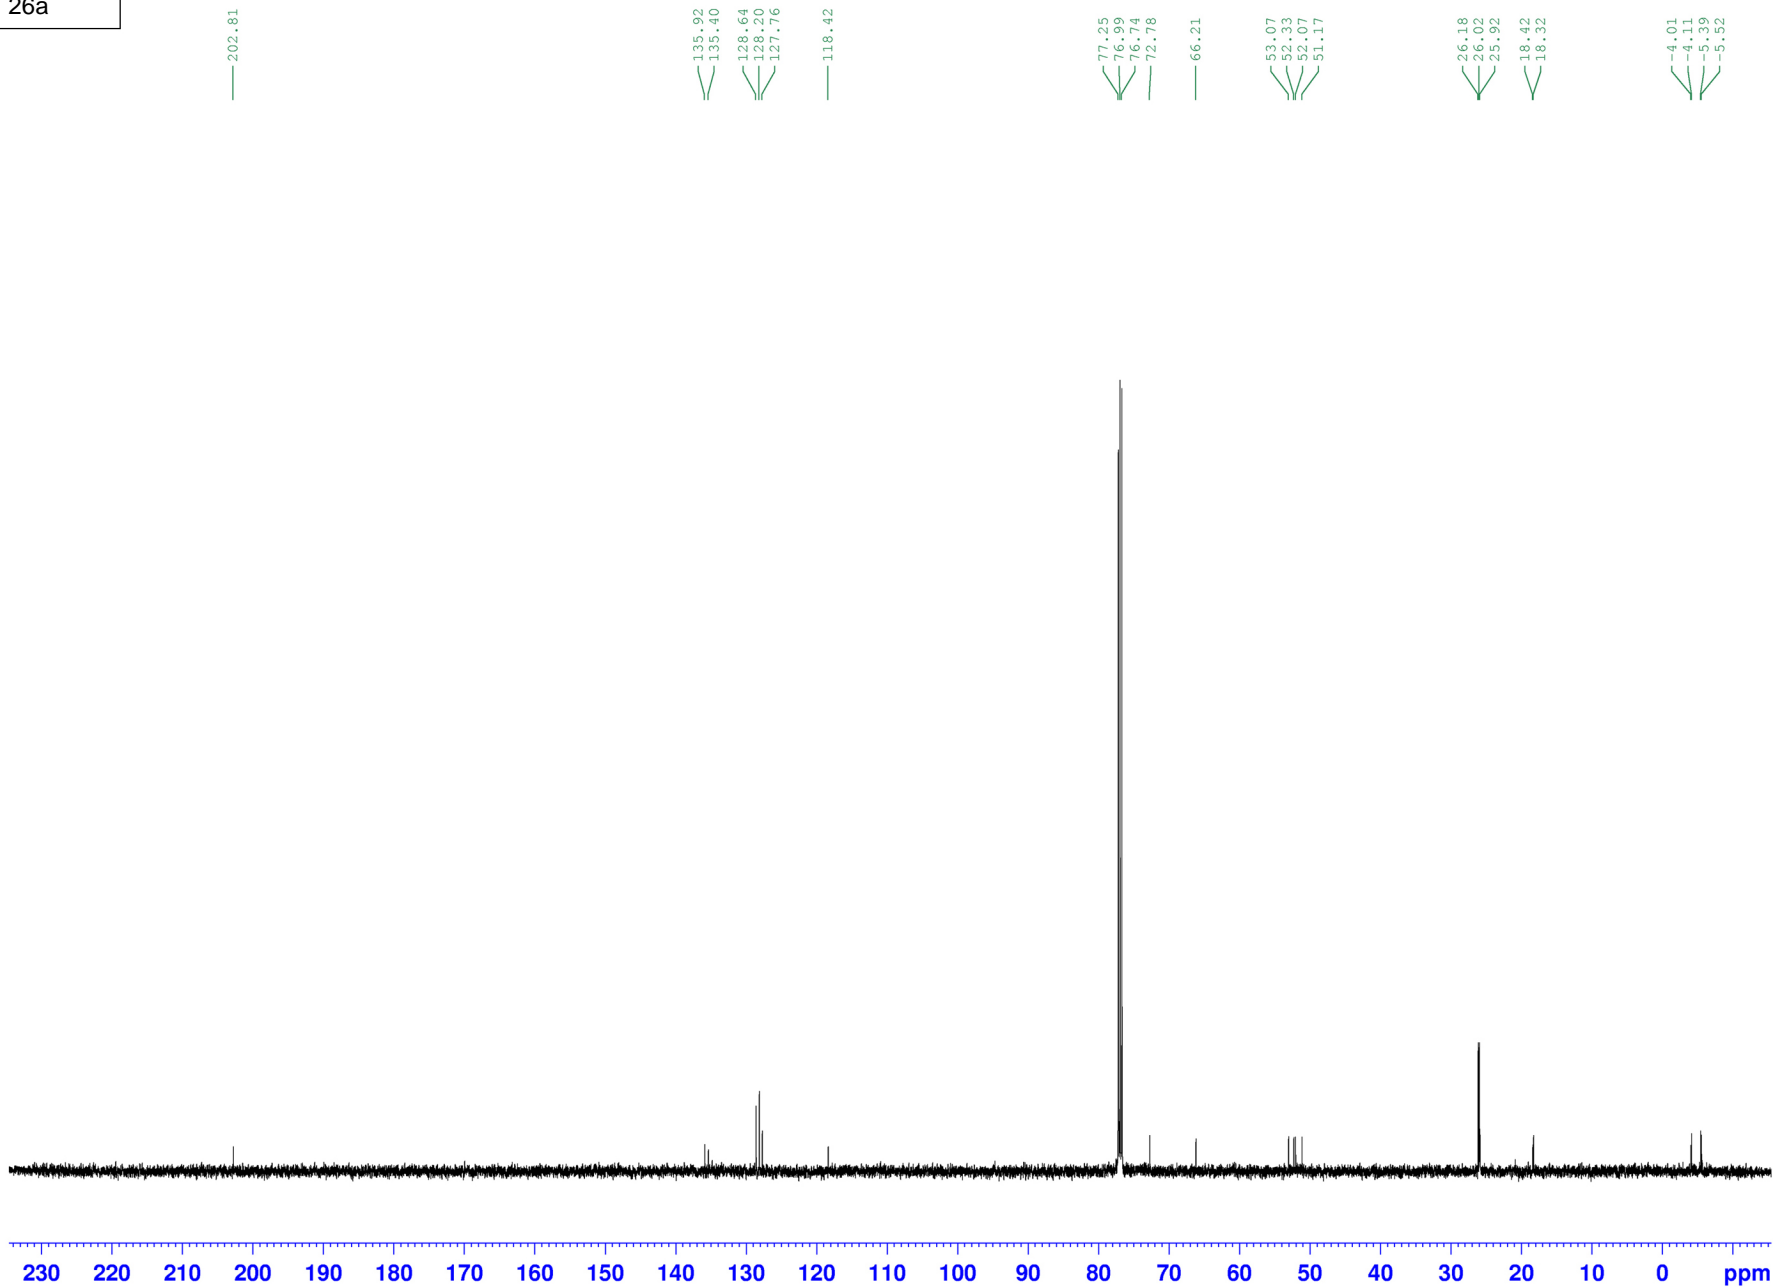

NAME May24-2008  
EXPNO 23  
PROCNO 1  
Date\_ 20080525  
Time 12.46  
INSTRUM drx500  
PROBHD 5 mm Multinu  
PULPROG zgpg30  
TD 65536  
SOLVENT CDCl3  
NS 256  
DS 4  
SWH 31446.541 Hz  
FIDRES 0.479836 Hz  
AQ 1.0420883 sec  
RG 3649.1  
DW 15.900 use  
DE 6.00 use  
TE 300.0 K  
D1 2.00000000 sec  
d11 0.03000000 sec  
d12 0.00002000 sec

===== CHANNEL f1 ===  
NUC1 13C  
P1 5.50 use  
PL1 0.00 dB  
SF01 125.7715719 MHz

===== CHANNEL f2 ===  
CPDPRG2 waltz16  
NUC2 1H  
PCPD2 95.00 use  
PL2 0.00 dB  
PL12 19.00 dB  
PL13 19.00 dB  
SF02 500.1320005 MHz  
SI 32768  
SF 125.7577922 MHz  
WDW EM  
SSB 0  
LB 1.00 Hz  
GB 0  
PC 1.40

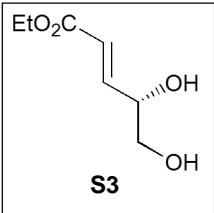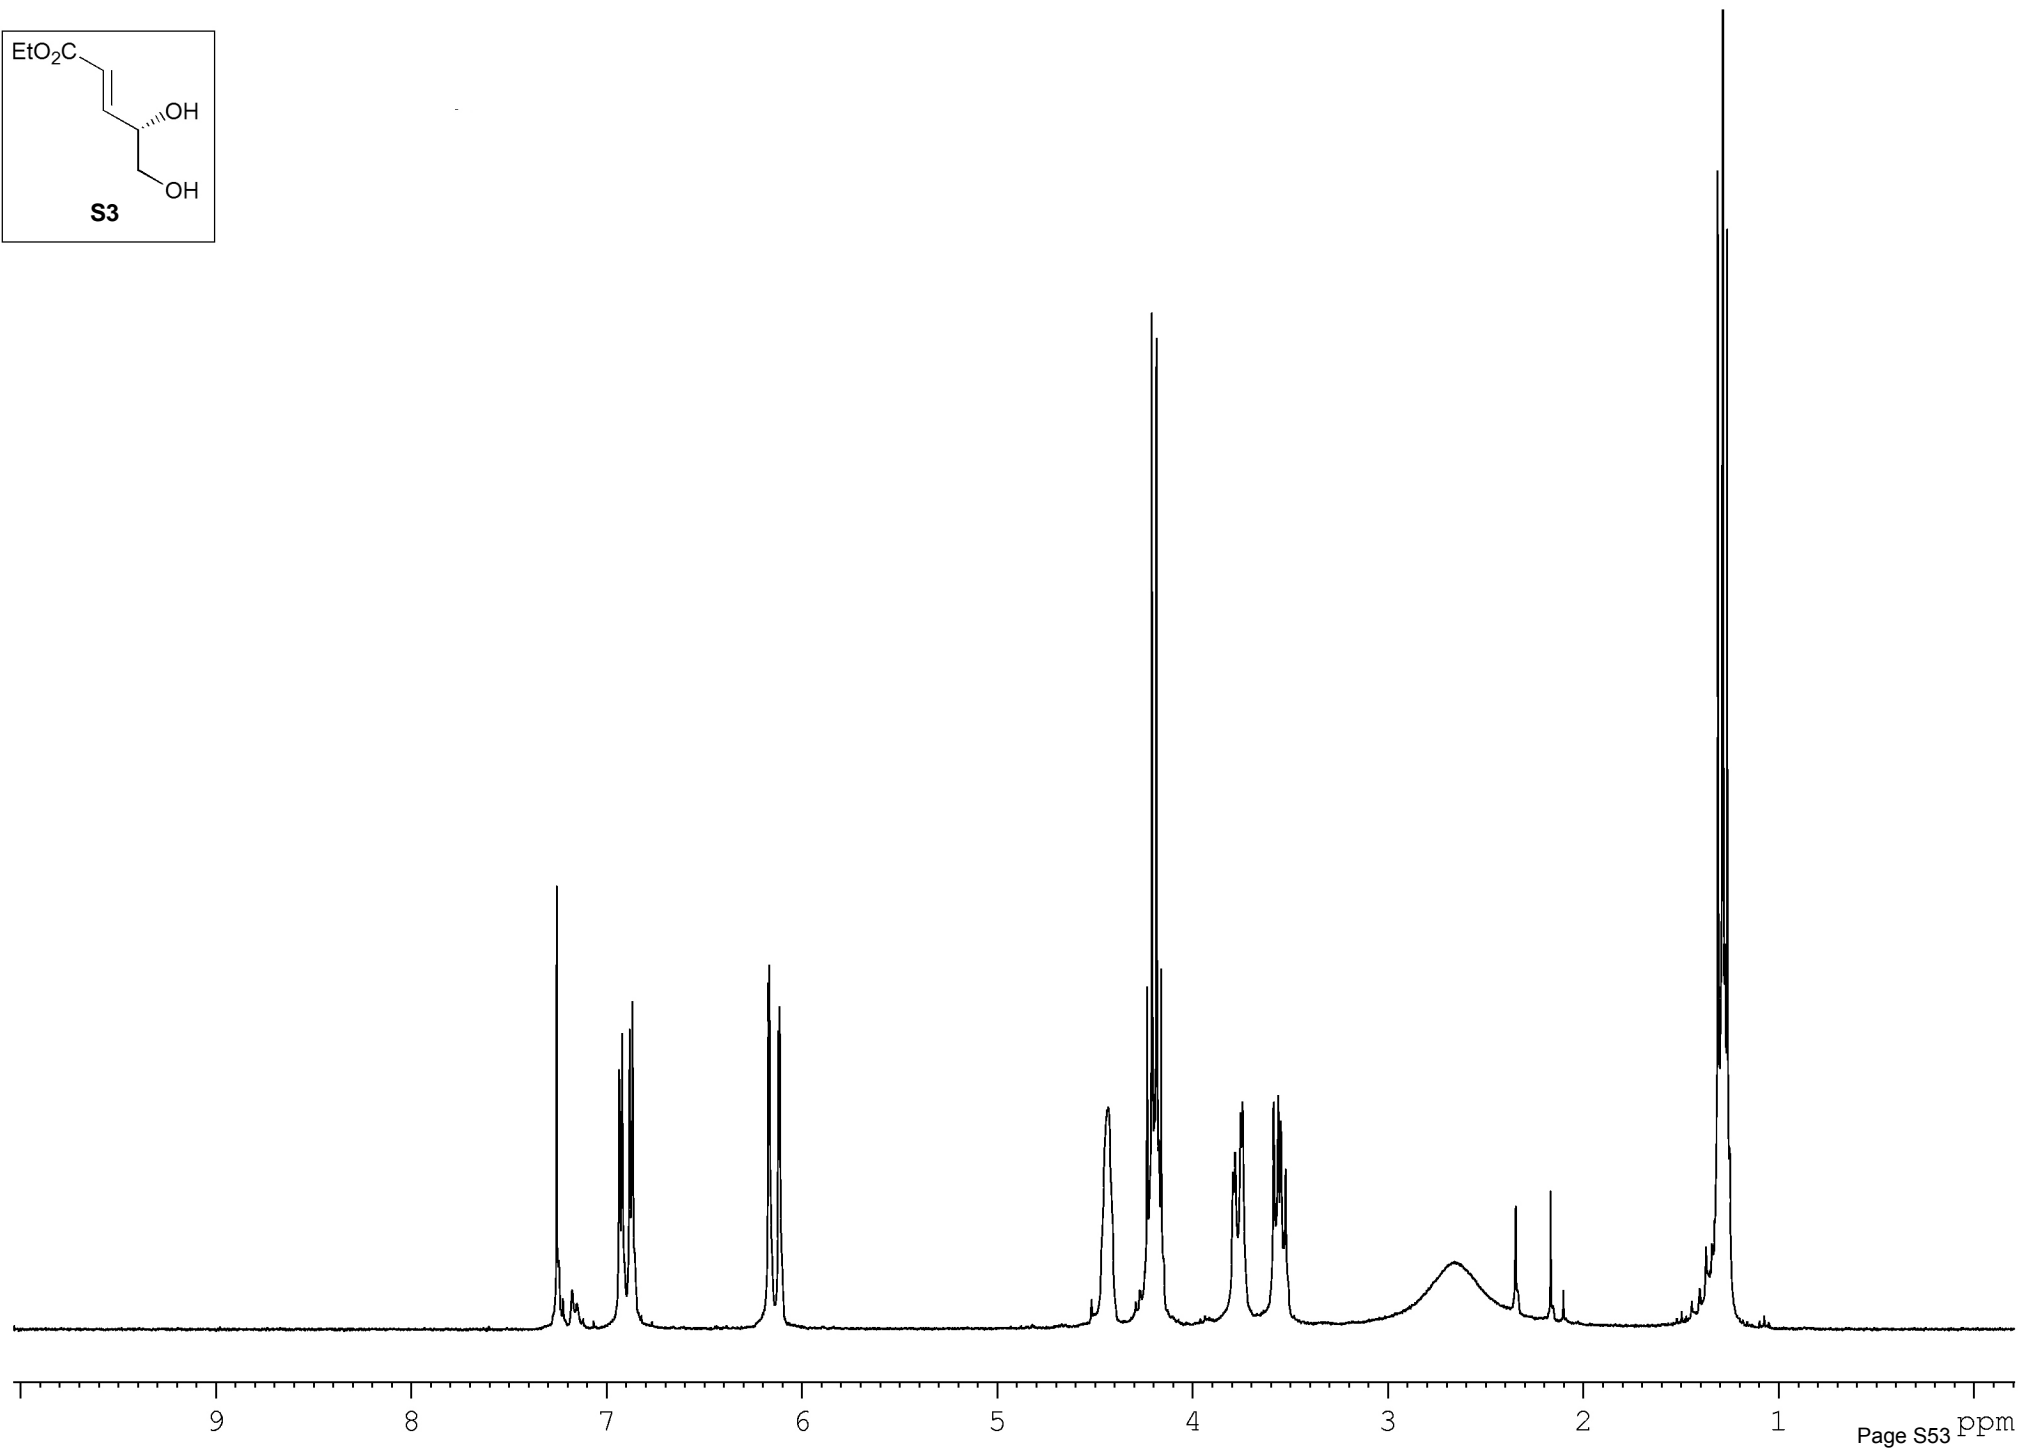

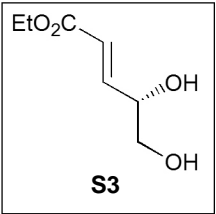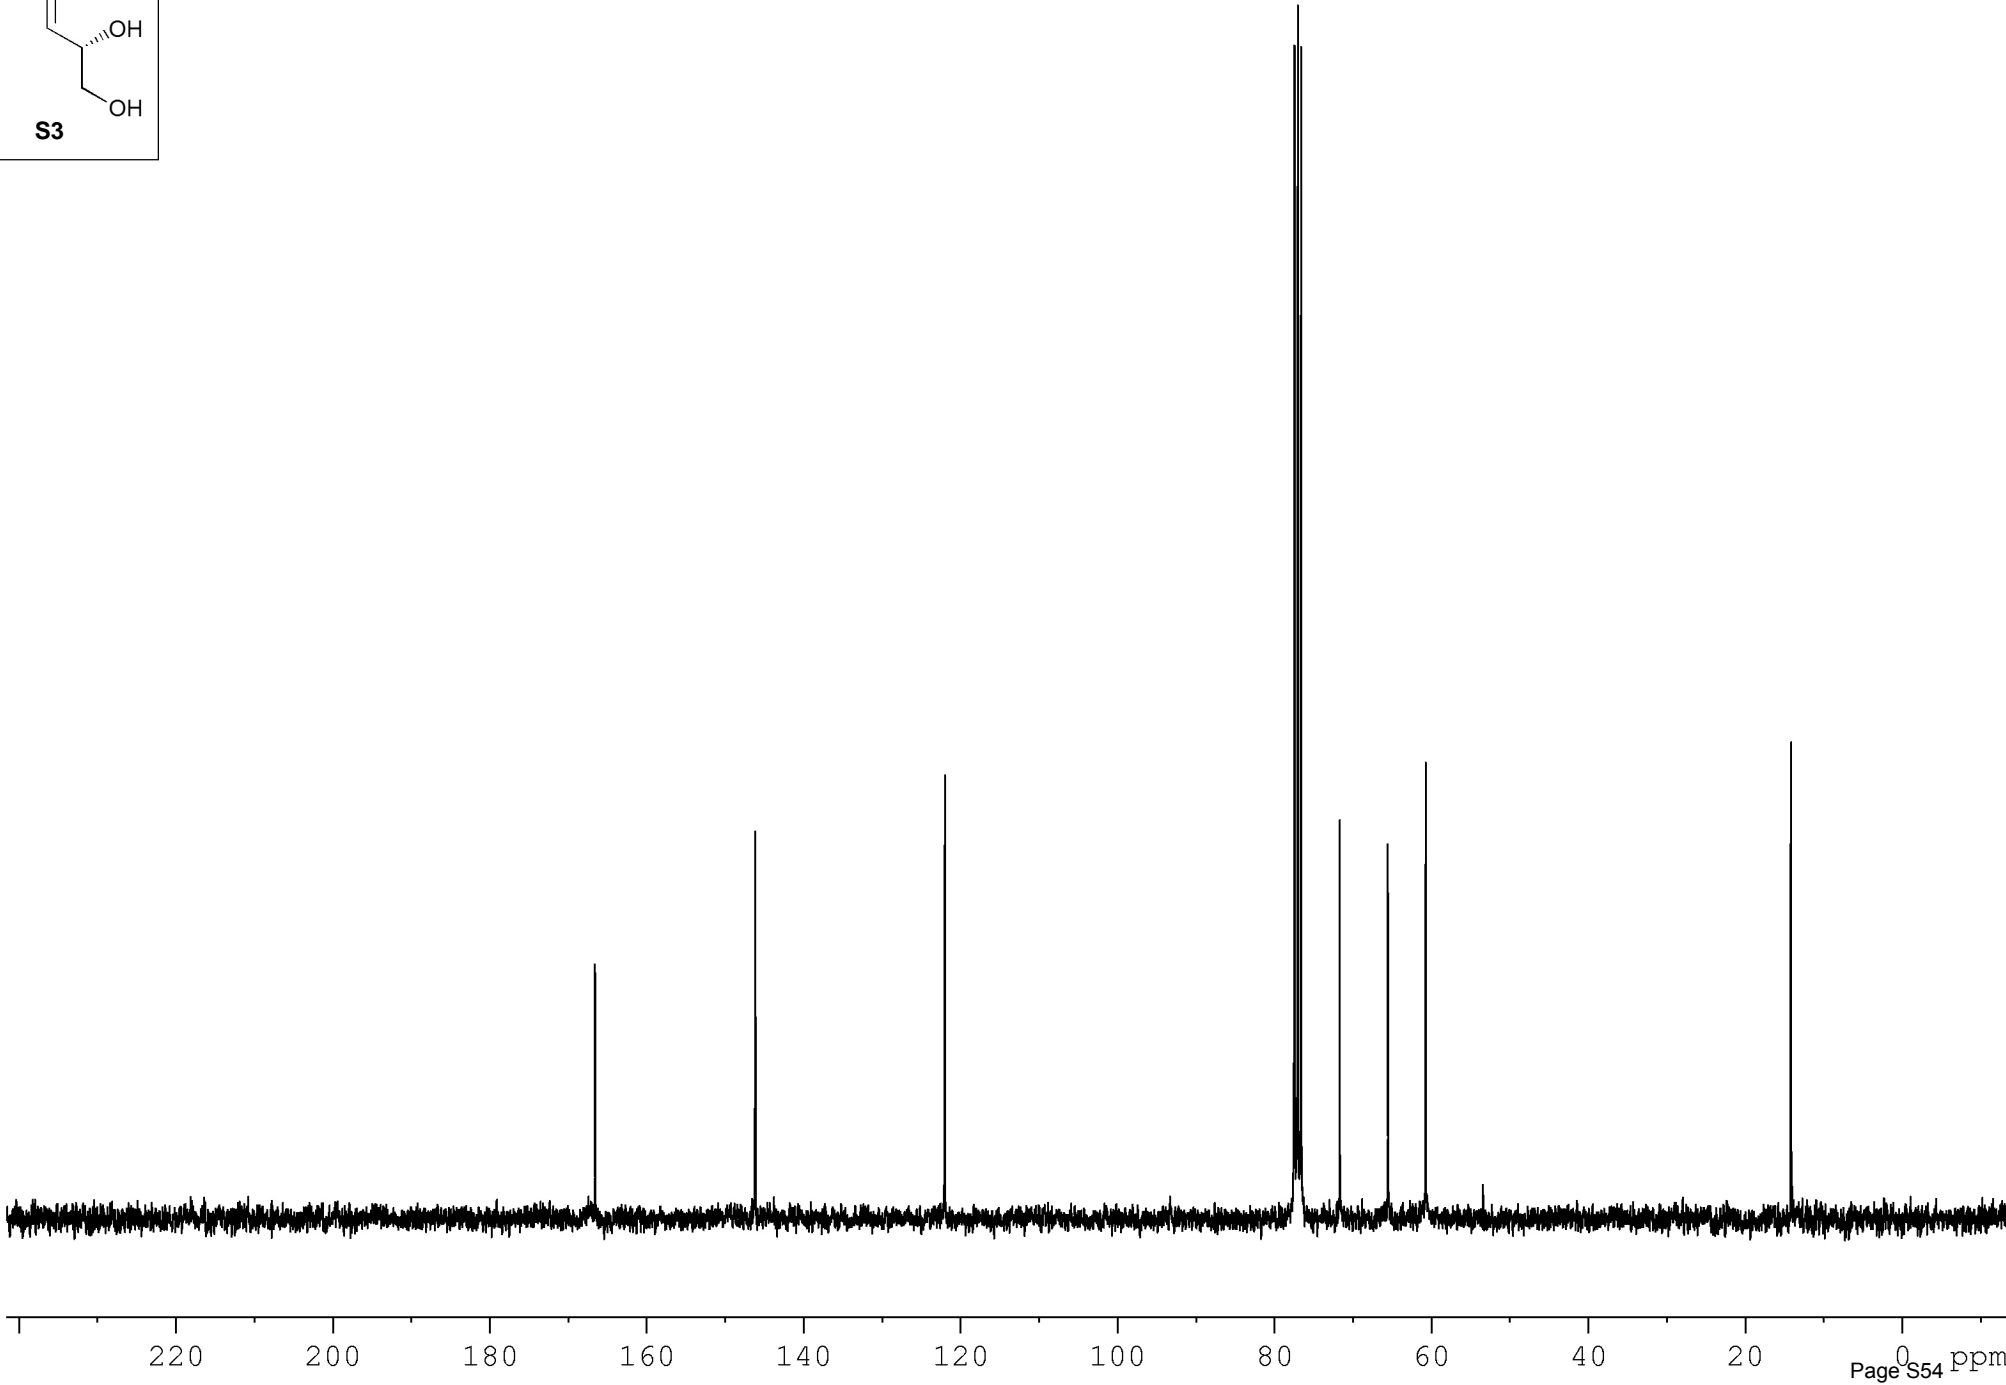

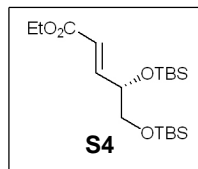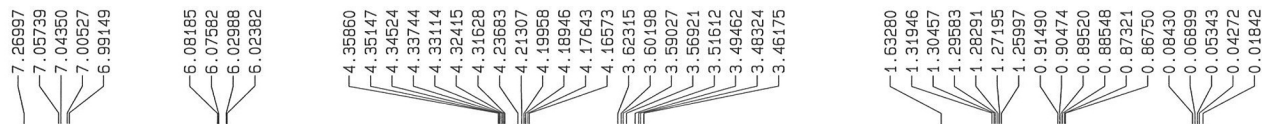

Current Data Parameters  
NAME Dec07-2006  
EXPNO 50  
PROCNO 1

F2 - Acquisition Parameters  
Date\_ 20061208  
Time 7.01  
INSTRUM amx300  
PROBHD 5 mm GNP 1H  
PULPROG zg30  
TD 53506  
SOLVENT CDCl3  
RO 20  
NS 16  
RO 20  
SWH 8771.930 Hz  
FIDRES 0.163943 Hz  
AQ 3.0498919 sec  
RG 256  
DW 57.000 usec  
DE 81.43 usec  
TE 300.0 K  
HL1 1 dB  
D1 0.12000000 sec  
P1 6.80 usec  
SF01 299.8758200 MHz  
NUCLEUS 1H

F2 - Processing parameters  
SI 32768  
SF 299.8727905 MHz  
WDW EM  
SSB 0  
LB 0.30 Hz  
GB 0  
PC 1.00  
SR 2790.52 Hz

1D NMR plot parameters  
CX 32.00 cm  
F1P 10.000 ppm  
F1 2998.73 Hz  
F2P -0.500 ppm  
F2 -149.94 Hz  
PPMCM 0.32812 ppm/cm  
HZCM 98.39577 Hz/cm

Integral

ppm

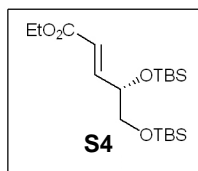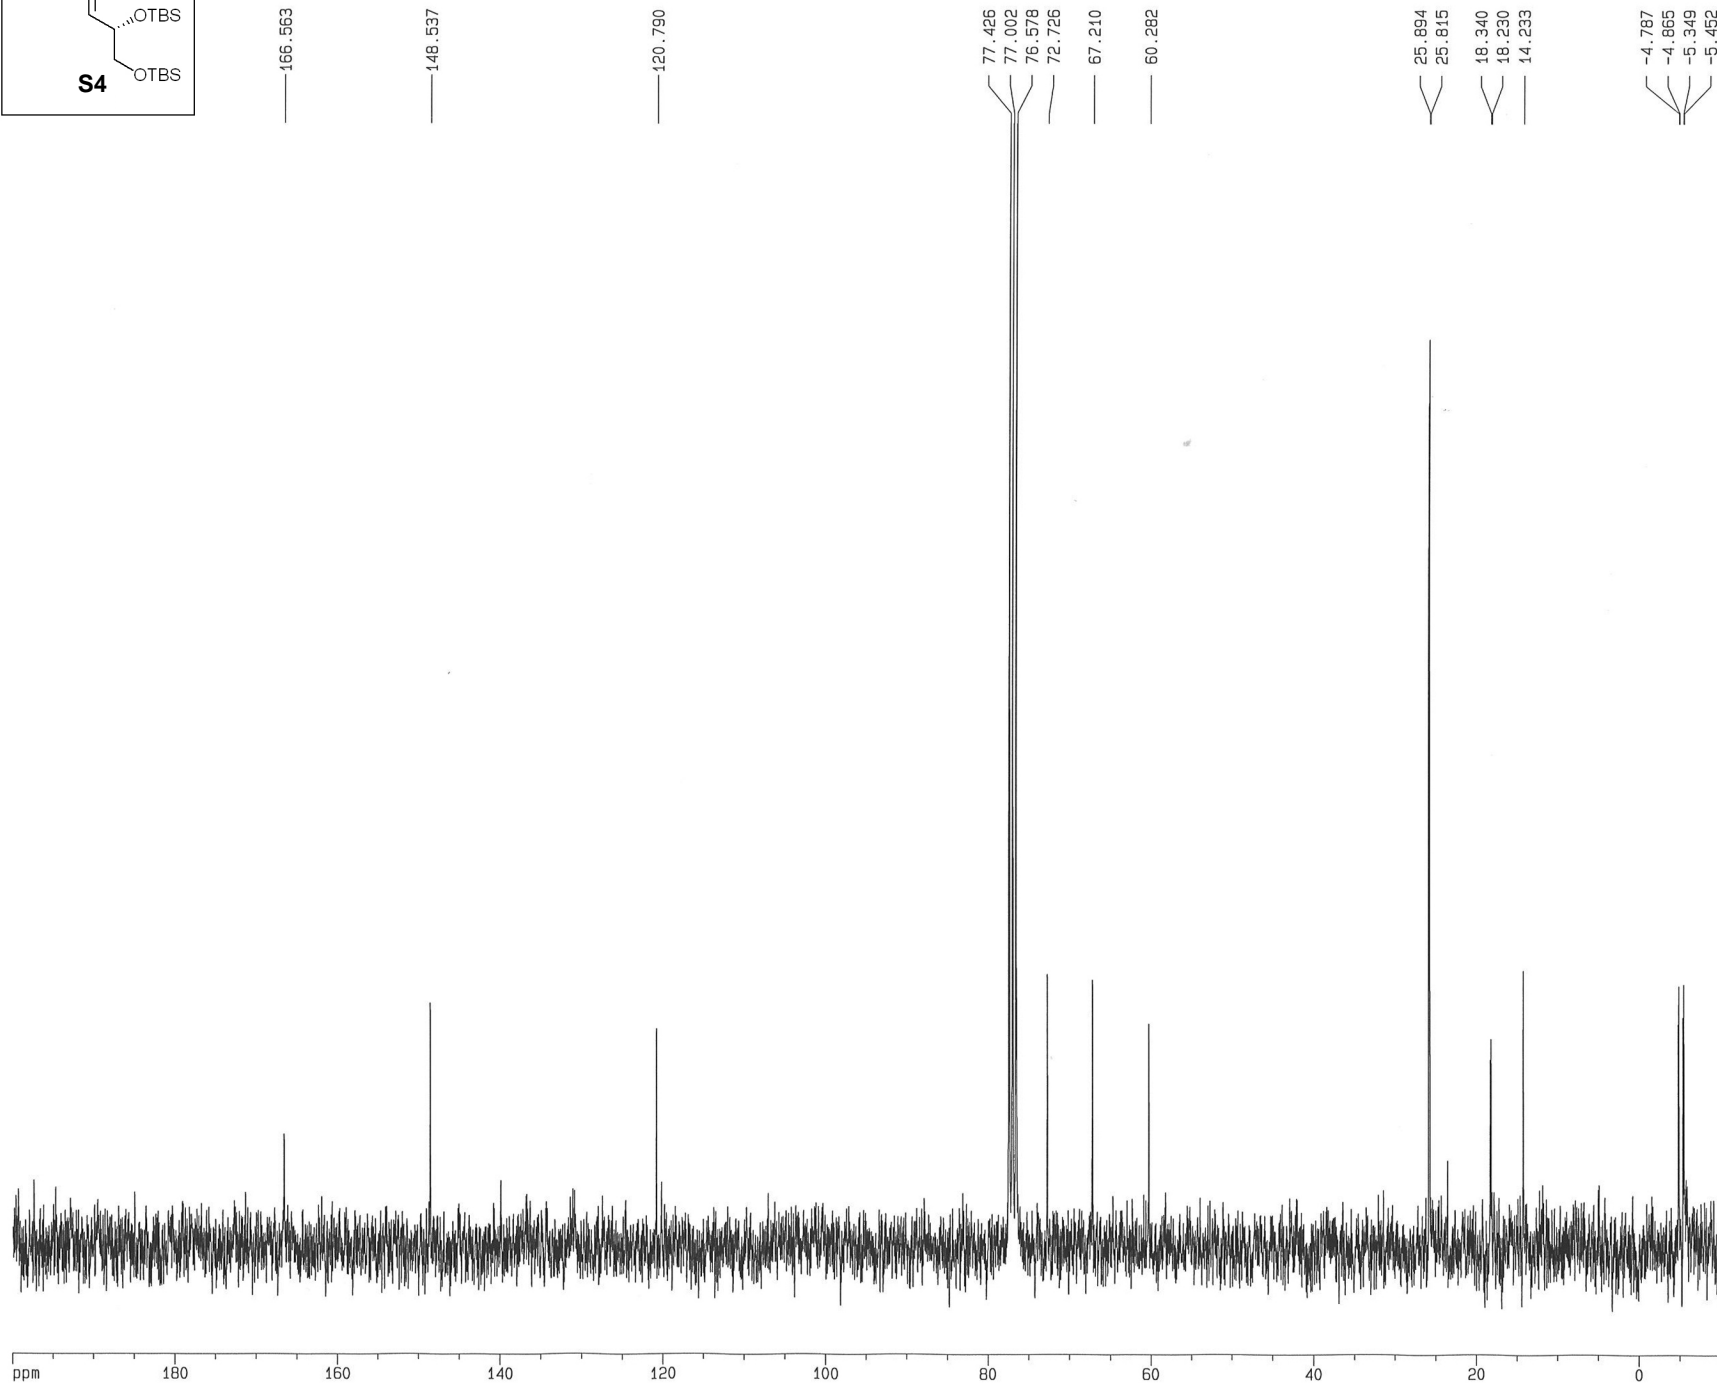

Current Data Parameters  
NAME Dec07-2006  
EXPNO 10  
PROCNO 1

F2 - Acquisition Parameters  
Date\_ 20061207  
Time 10.55  
INSTRUM amx300  
PROBHD 5 mm GNP 1H  
PULPROG zgpg30  
TD 42304  
SOLVENT CDCl3  
RO 20  
NS 128  
R0 20  
SWH 19230.770 Hz  
FIDRES 0.454585 Hz  
AQ 1.0999540 sec  
RG 32768  
DW 26.000 usec  
DE 37.14 usec  
TE 300.0 K  
HL1 1 dB  
D1 2.00000000 sec  
CPDPRG waltz16  
P31 95.00 usec  
S4 27 dB  
D11 0.03000000 sec  
S2 27 dB  
P1 4.00 usec  
SF01 75.4116768 MHz  
NUCLEUS 13C

F2 - Processing parameters  
SI 65536  
SF 75.4030737 MHz  
WDW EM  
SSB 0  
LB 2.00 Hz  
GB 0  
PC 1.40  
SR 3073.67 Hz

1D NMR plot parameters  
CX 32.00 cm  
F1P 200.000 ppm  
F1 15080.62 Hz  
F2P -10.000 ppm  
F2 -754.03 Hz  
PPMCM 6.56250 ppm/cm  
HZCM 494.83264 Hz/cm

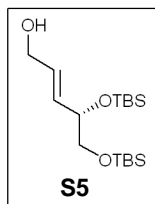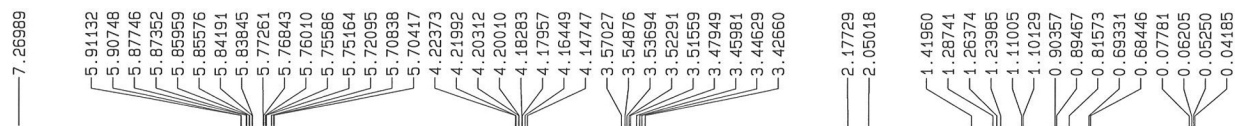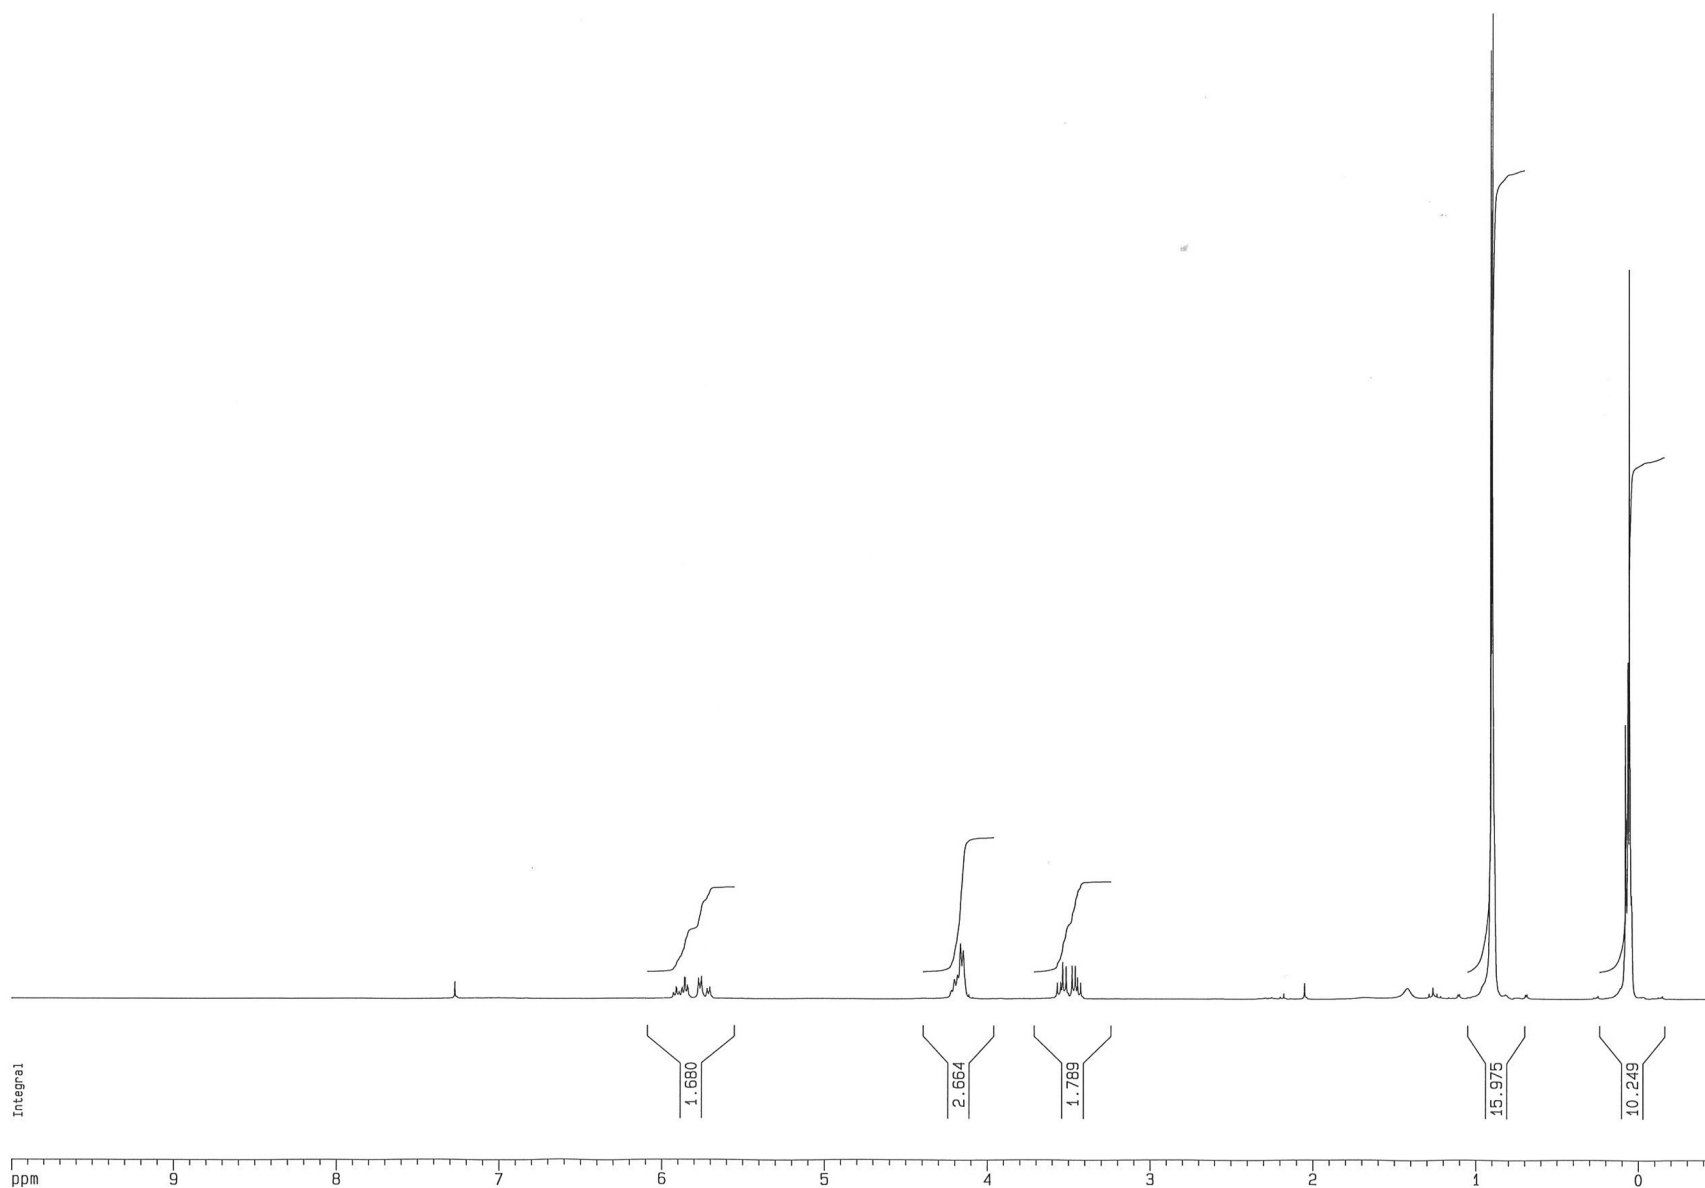

Current Data Parameters  
NAME Dec08-2006  
EXPNO 20  
PROCNO 1

F2 - Acquisition Parameters  
Date\_ 20061208  
Time 11.58  
INSTRUM amx300  
PROBHD 5 mm QNP 1H  
PULPROG zg30  
TD 53506  
SOLVENT CDCl3  
RO 20  
NS 16  
R0 20  
SMH 8771.930 Hz  
FIDRES 0.163943 Hz  
AQ 3.0498919 sec  
RG 512  
DW 57.000 usec  
DE 81.43 usec  
TE 300.0 K  
HL1 1 dB  
D1 0.12000000 sec  
P1 6.80 usec  
SF01 299.8758200 MHz  
NUCLEUS 1H

F2 - Processing parameters  
SI 32768  
SF 299.8727905 MHz  
WDW EM  
SSB 0  
LB 0.30 Hz  
GB 0  
PC 1.00  
SR 2790.52 Hz

1D NMR plot parameters  
CX 32.00 cm  
F1P 10.000 ppm  
F1 2998.73 Hz  
F2P -0.500 ppm  
F2 -149.94 Hz  
PPMCM 0.32812 ppm/cm  
HZCM 98.39577 Hz/cm

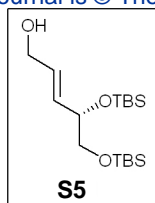

132.255  
129.611

77.425  
77.001  
76.577  
73.436  
67.959  
63.242

25.954  
25.881  
18.392  
18.284

-4.642  
-5.243  
-5.354

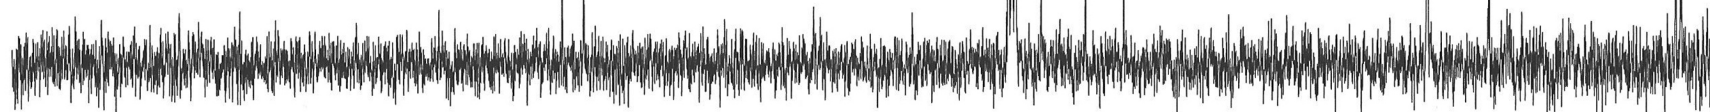

Current Data Parameters  
NAME Dec08-2006  
EXPNO 21  
PROCNO 1

F2 - Acquisition Parameters  
Date\_ 20061208  
Time 12.06  
INSTRUM amx300  
PROBHD 5 mm GNP 1H  
PULPROG zgpg30  
TD 42304  
SOLVENT CDC13  
RO 20  
NS 128  
RQ 20  
SWH 19230.770 Hz  
FIDRES 0.454585 Hz  
AQ 1.0999540 sec  
RG 32768  
DW 26.000 usec  
DE 37.14 usec  
TE 300.0 K  
HL1 1 dB  
D1 2.00000000 sec  
CPDPRG waltz16  
P31 95.00 usec  
S4 27 dB  
D11 0.03000000 sec  
S2 27 dB  
P1 4.00 usec  
SF01 75.4116768 MHz  
NUCLEUS 13C

F2 - Processing parameters  
SI 65536  
SF 75.4030740 MHz  
WDW EM  
SSB 0  
LB 2.00 Hz  
GB 0  
PC 1.40  
SR 3073.96 Hz

1D NMR plot parameters  
CX 32.00 cm  
F1P 200.000 ppm  
F1 15080.62 Hz  
F2P -10.000 ppm  
F2 -754.03 Hz  
PPMCM 6.56250 ppm/cm  
HZCM 494.83264 Hz/cm

ppm 180 160 140 120 100 80 60 40 20 0

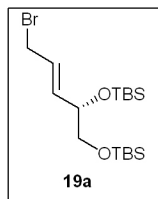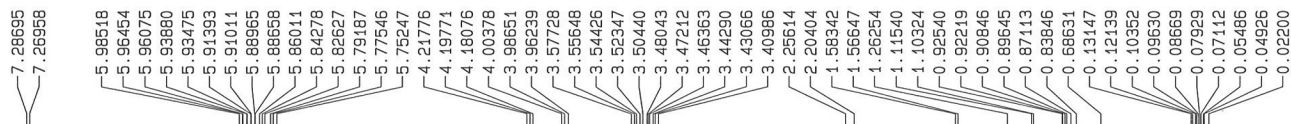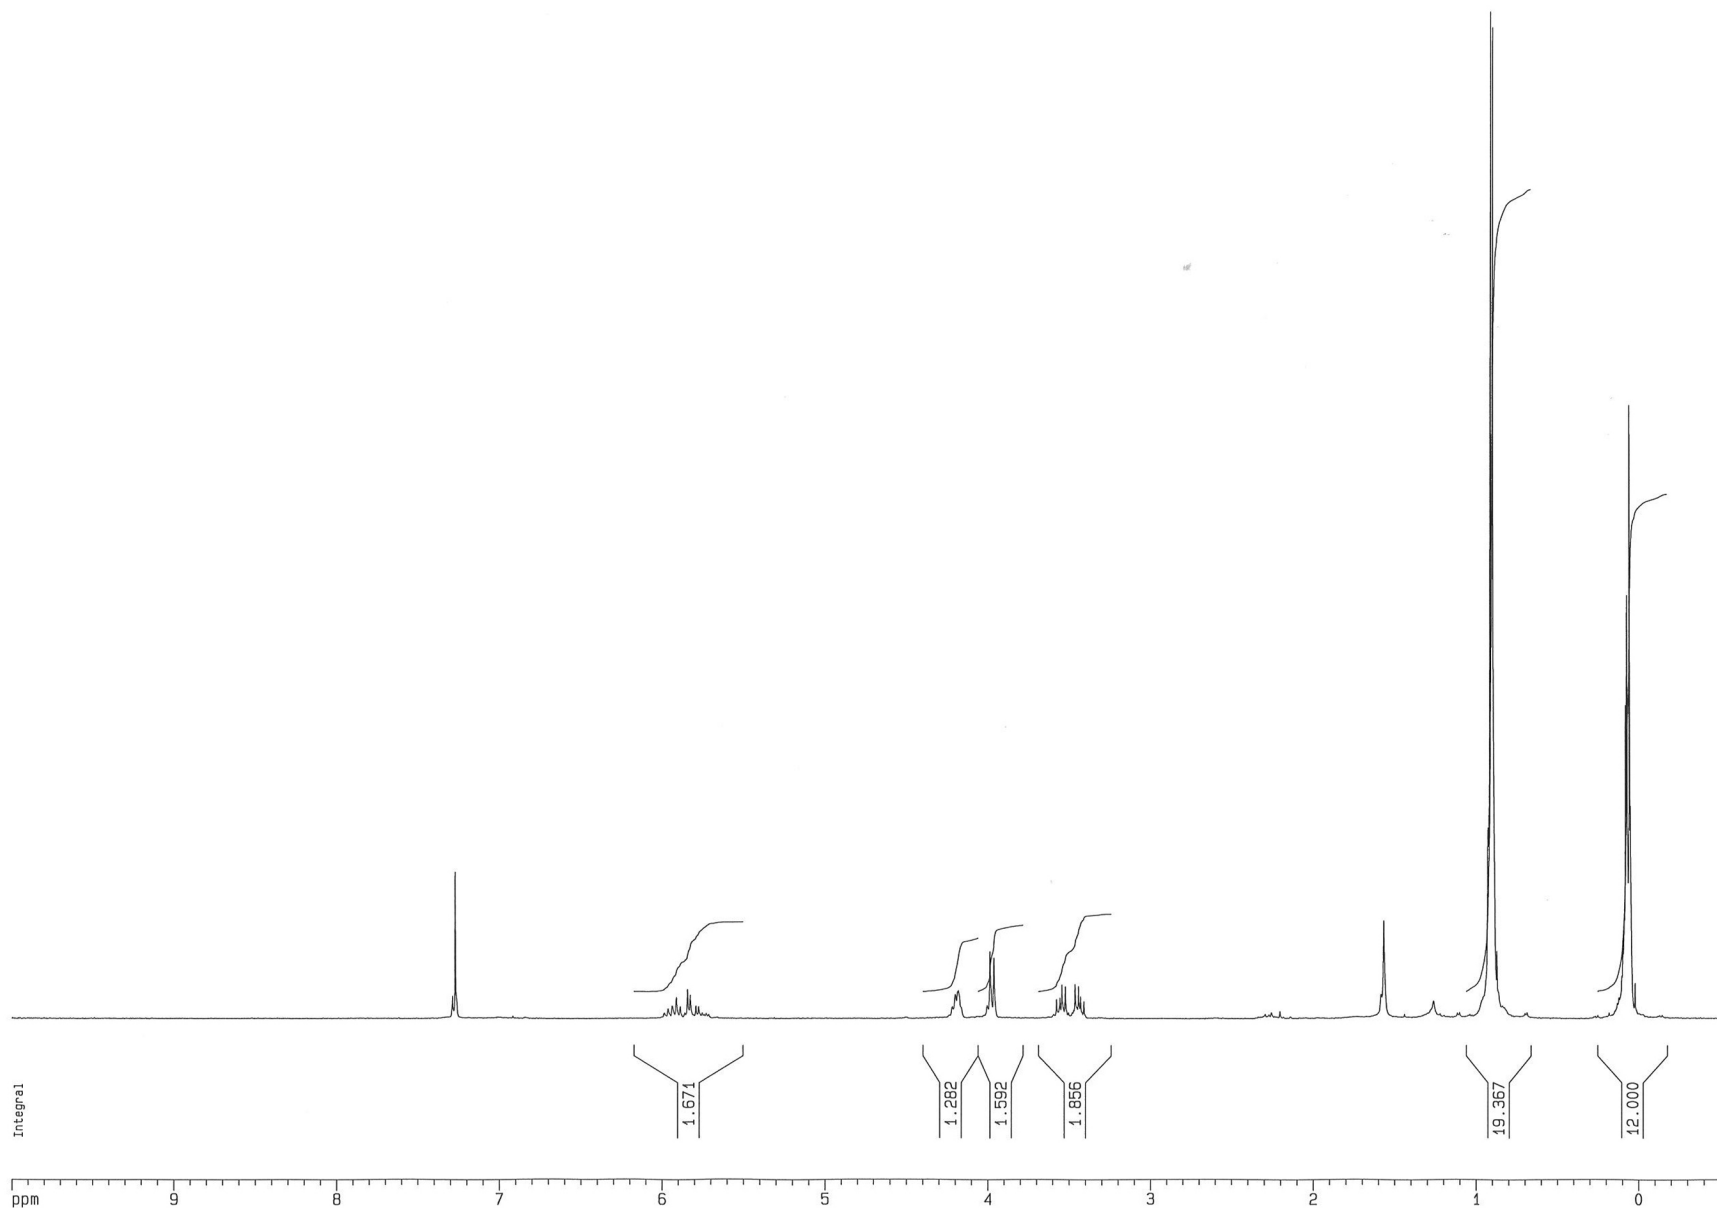

Current Data Parameters  
NAME Dec11-2006  
EXPNO 20  
PROCNO 1

F2 - Acquisition Parameters  
Date\_ 20061211  
Time 12.38  
INSTRUM amx300  
PROBHD 5 mm QNP 1H  
PULPROG zg30  
TD 53506  
SOLVENT CDC13  
RO 20  
NS 16  
RO 20  
SWH 8771.930 Hz  
FIDRES 0.163943 Hz  
AQ 3.0498919 sec  
RG 2048  
DW 57.000 usec  
DE 81.43 usec  
TE 300.0 K  
HL1 1 dB  
D1 0.12000000 sec  
P1 6.80 usec  
SFO1 299.8758200 MHz  
NUCLEUS 1H

F2 - Processing parameters  
SI 32768  
SF 299.8727905 MHz  
WDW EM  
SSB 0  
LB 0.30 Hz  
GB 0  
PC 1.00  
SR 2790.52 Hz

1D NMR plot parameters  
CX 32.00 cm  
F1P 10.000 ppm  
F1 2998.73 Hz  
F2P -0.500 ppm  
F2 -149.94 Hz  
PPMCM 0.32812 ppm/cm  
HZCM 98.39577 Hz/cm

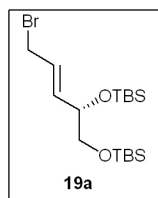

135.981

126.697

77.422

76.999

76.575

72.989

67.658

32.439

25.933

25.856

18.357

18.259

-4.655

-4.724

-5.295

-5.370

Current Data Parameters  
NAME Dec11-2006  
EXPNO 40  
PROCNO 1

F2 - Acquisition Parameters  
Date\_ 20061211  
Time 16.27  
INSTRUM amx300  
PROBHD 5 mm GNP 1H  
PULPROG zgpg30  
TD 42304  
SOLVENT CDC13  
RO 20  
NS 128  
R0 20  
SWH 19230.770 Hz  
FIDRES 0.454585 Hz  
AQ 1.0999540 sec  
RG 32768  
DW 26.000 usec  
DE 37.14 usec  
TE 300.0 K  
HL1 1 dB  
D1 2.00000000 sec  
CPDPRG waltz16  
P31 95.00 usec  
S4 27 dB  
D11 0.03000000 sec  
S2 27 dB  
P1 4.00 usec  
SF01 75.4116768 MHz  
NUCLEUS 13C

F2 - Processing parameters  
SI 65536  
SF 75.4030743 MHz  
WDW EM  
SSB 0  
LB 2.00 Hz  
GB 0  
PC 1.40  
SR 3074.26 Hz

1D NMR plot parameters  
CX 32.00 cm  
F1P 200.000 ppm  
F1 15080.62 Hz  
F2P -10.000 ppm  
F2 -754.03 Hz  
PPMCM 6.56250 ppm/cm  
HZCM 494.83264 Hz/cm

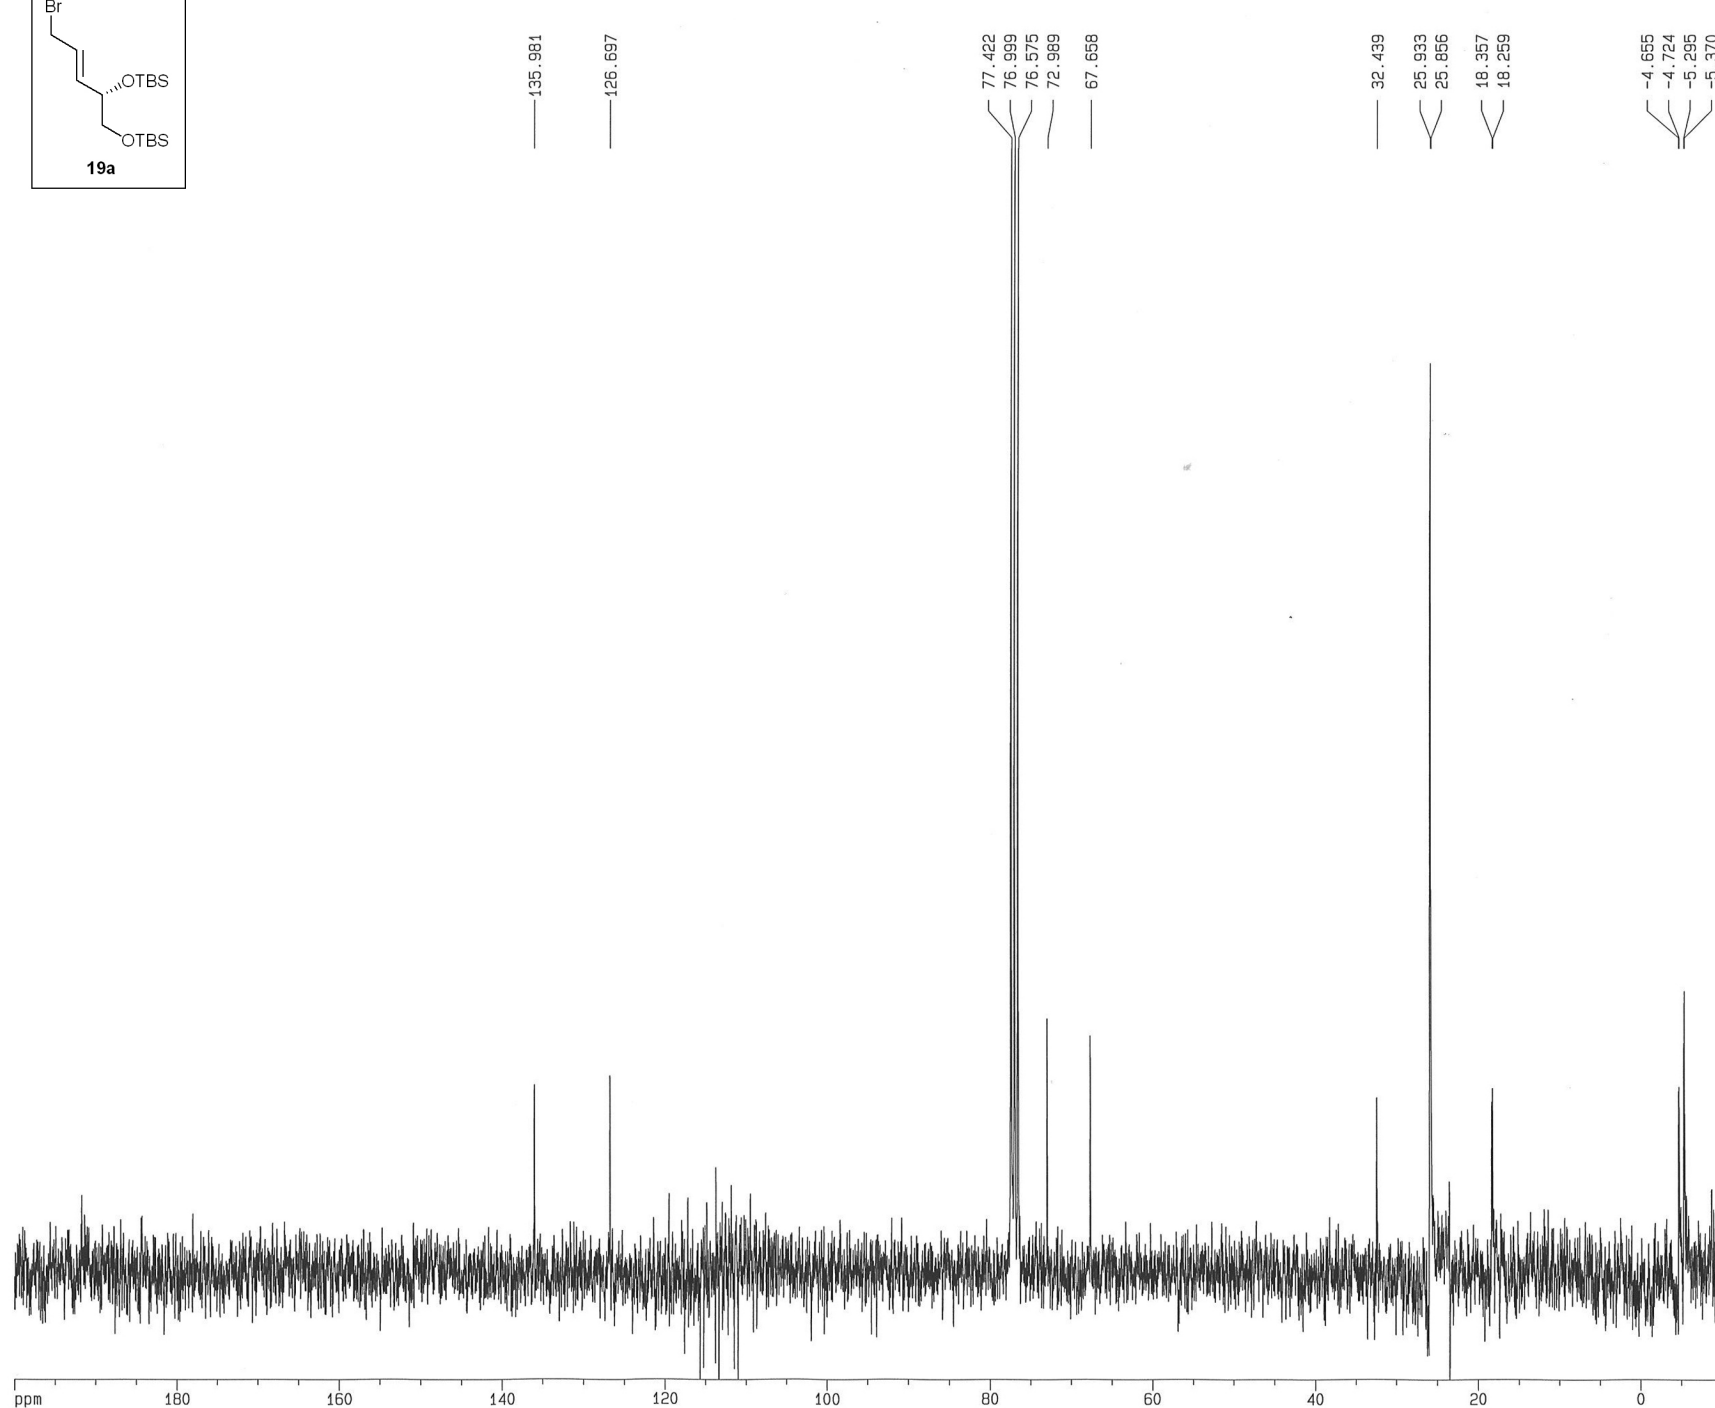

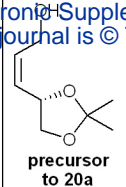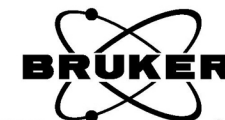

NAME May21-2008  
EXPNO 41  
PROCNO 1  
Date\_ 20080521  
Time 21.04  
INSTRUM drx500  
PROBHD 5 mm Multinu  
PULPROG zg30  
TD 82642  
SOLVENT CDCl3  
NS 16  
DS 2  
SWH 10330.578 Hz  
FIDRES 0.125004 Hz  
AQ 3.9999712 sec  
RG 181  
DW 48.400 use  
DE 6.00 use  
TE 300.0 K  
D1 1.00000000 sec

===== CHANNEL f1 =====  
NUC1 1H  
P1 15.50 use  
PL1 0.00 dB  
SF01 500.1330885 MHz  
SI 65536  
SF 500.1300000 MHz  
WDW EM  
SSB 0  
LB 0.30 Hz  
GB 0  
PC 1.00

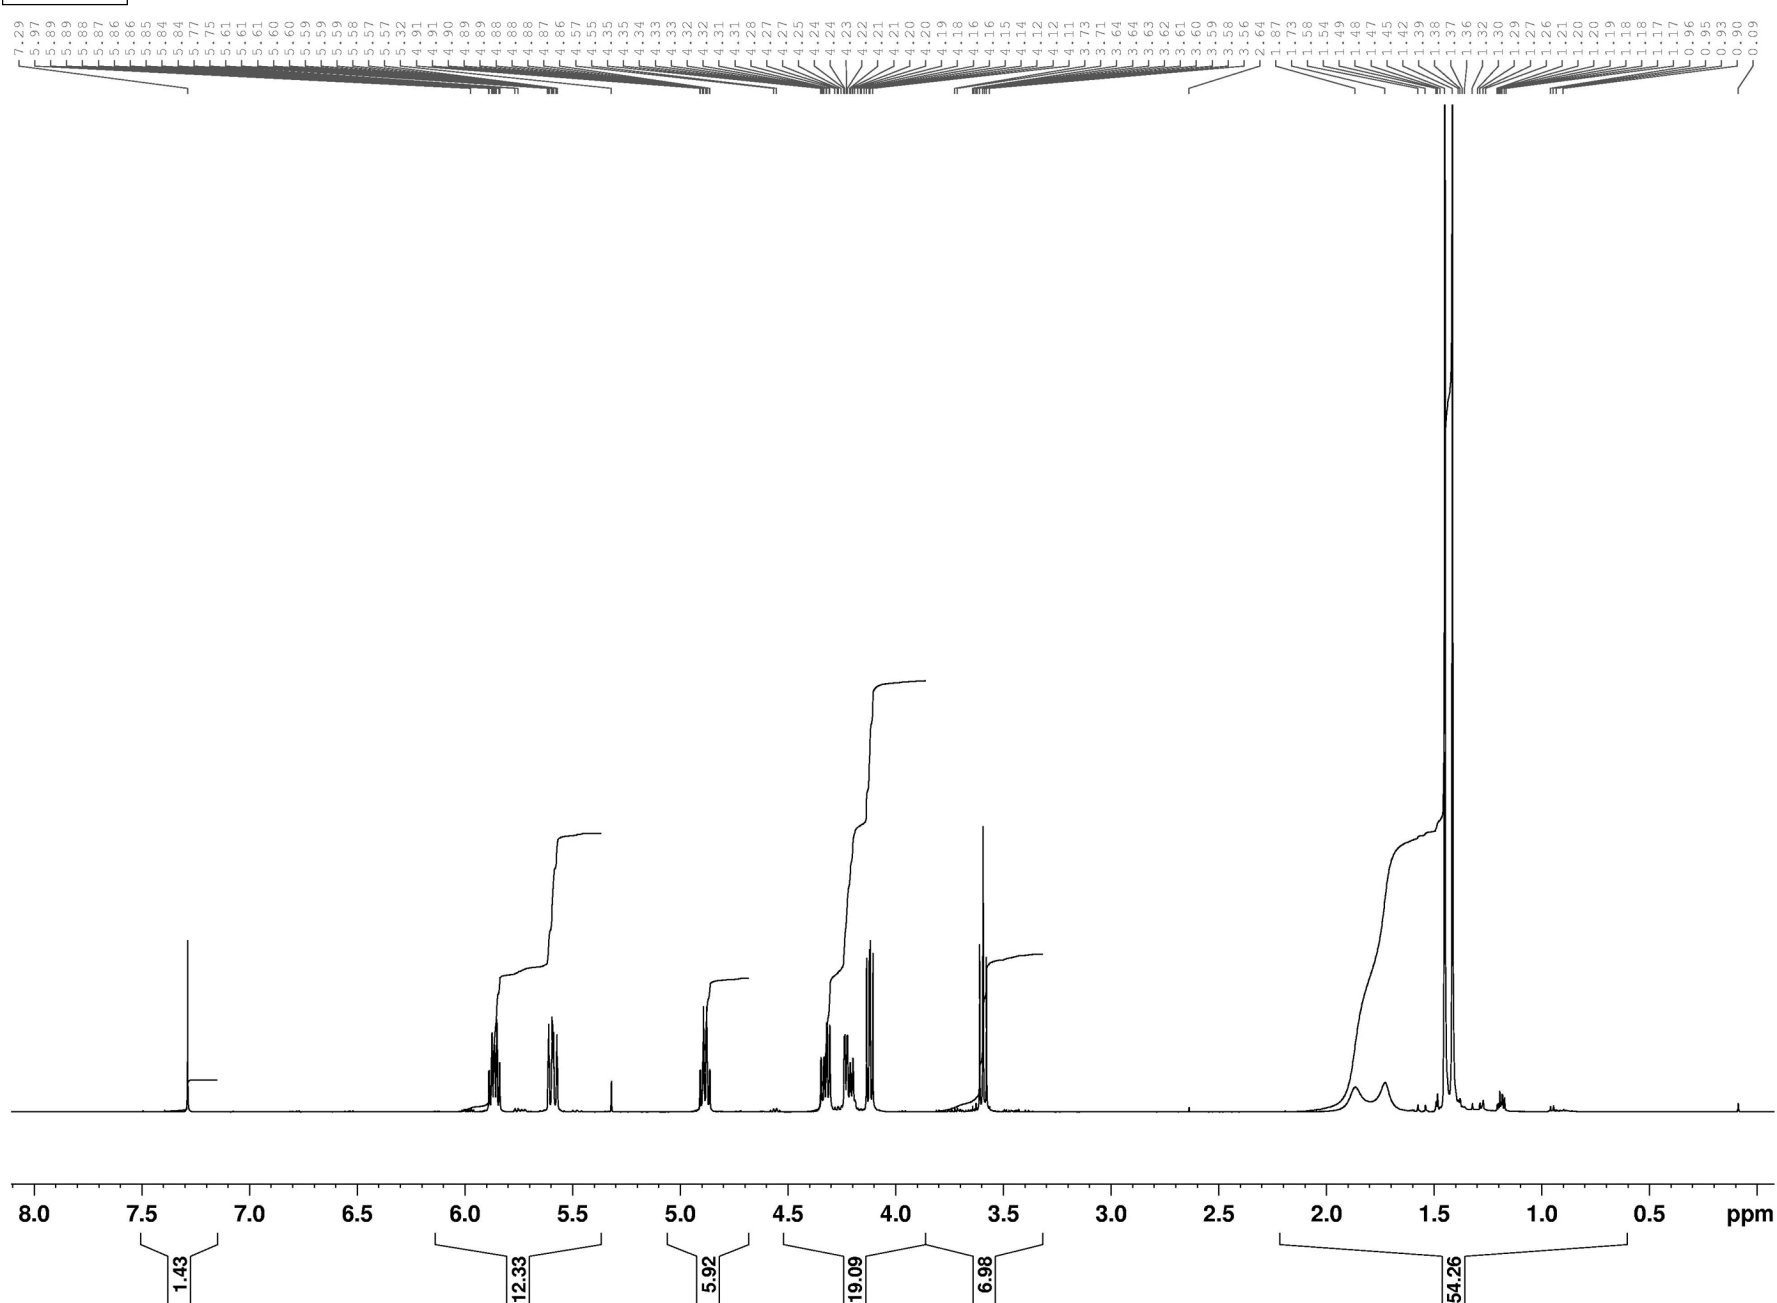

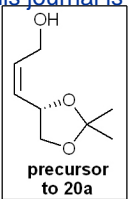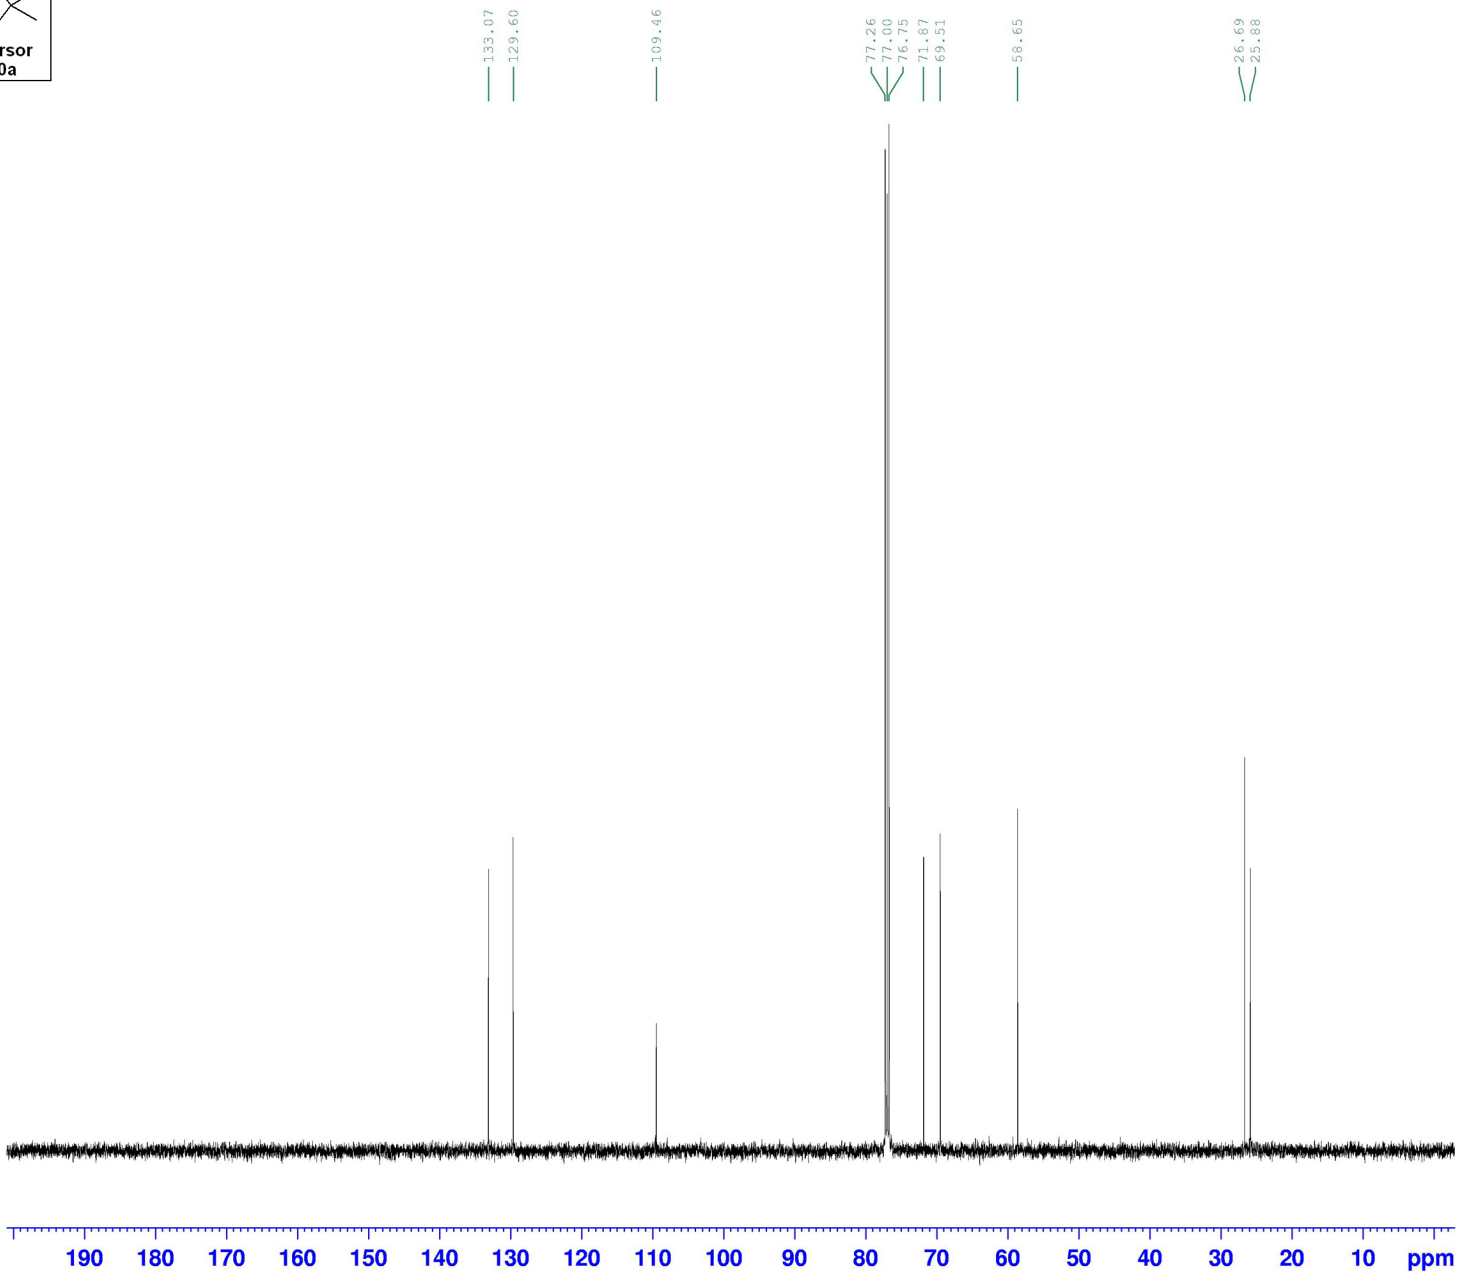

NAME May21-2008  
EXPNO 44  
PROCNO 1  
Date\_ 20080521  
Time 21.51  
INSTRUM drx500  
PROBHD 5 mm Multinu  
PULPROG zgpg30  
TD 65536  
SOLVENT CDC13  
NS 256  
DS 4  
SWH 31446.541 Hz  
FIDRES 0.479836 Hz  
AQ 1.0420883 sec  
RG 3649.1  
DW 15.900 usec  
DE 6.00 usec  
TE 300.0 K  
D1 2.00000000 sec  
d11 0.03000000 sec  
d12 0.00002000 sec

===== CHANNEL f1 =====  
NUC1 13C  
P1 5.50 usec  
PL1 0.00 dB  
SFO1 125.7715719 MHz

===== CHANNEL f2 =====  
CPDPRG2 waltz16  
NUC2 1H  
PCPD2 95.00 usec  
PL2 0.00 dB  
PL12 19.00 dB  
PL13 19.00 dB  
SFO2 500.1320005 MHz  
SI 32768  
SF 125.7577922 MHz  
WDW EM  
SSB 0  
LB 1.00 Hz  
GB 0  
PC 1.40

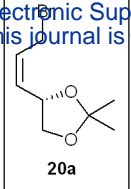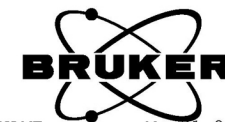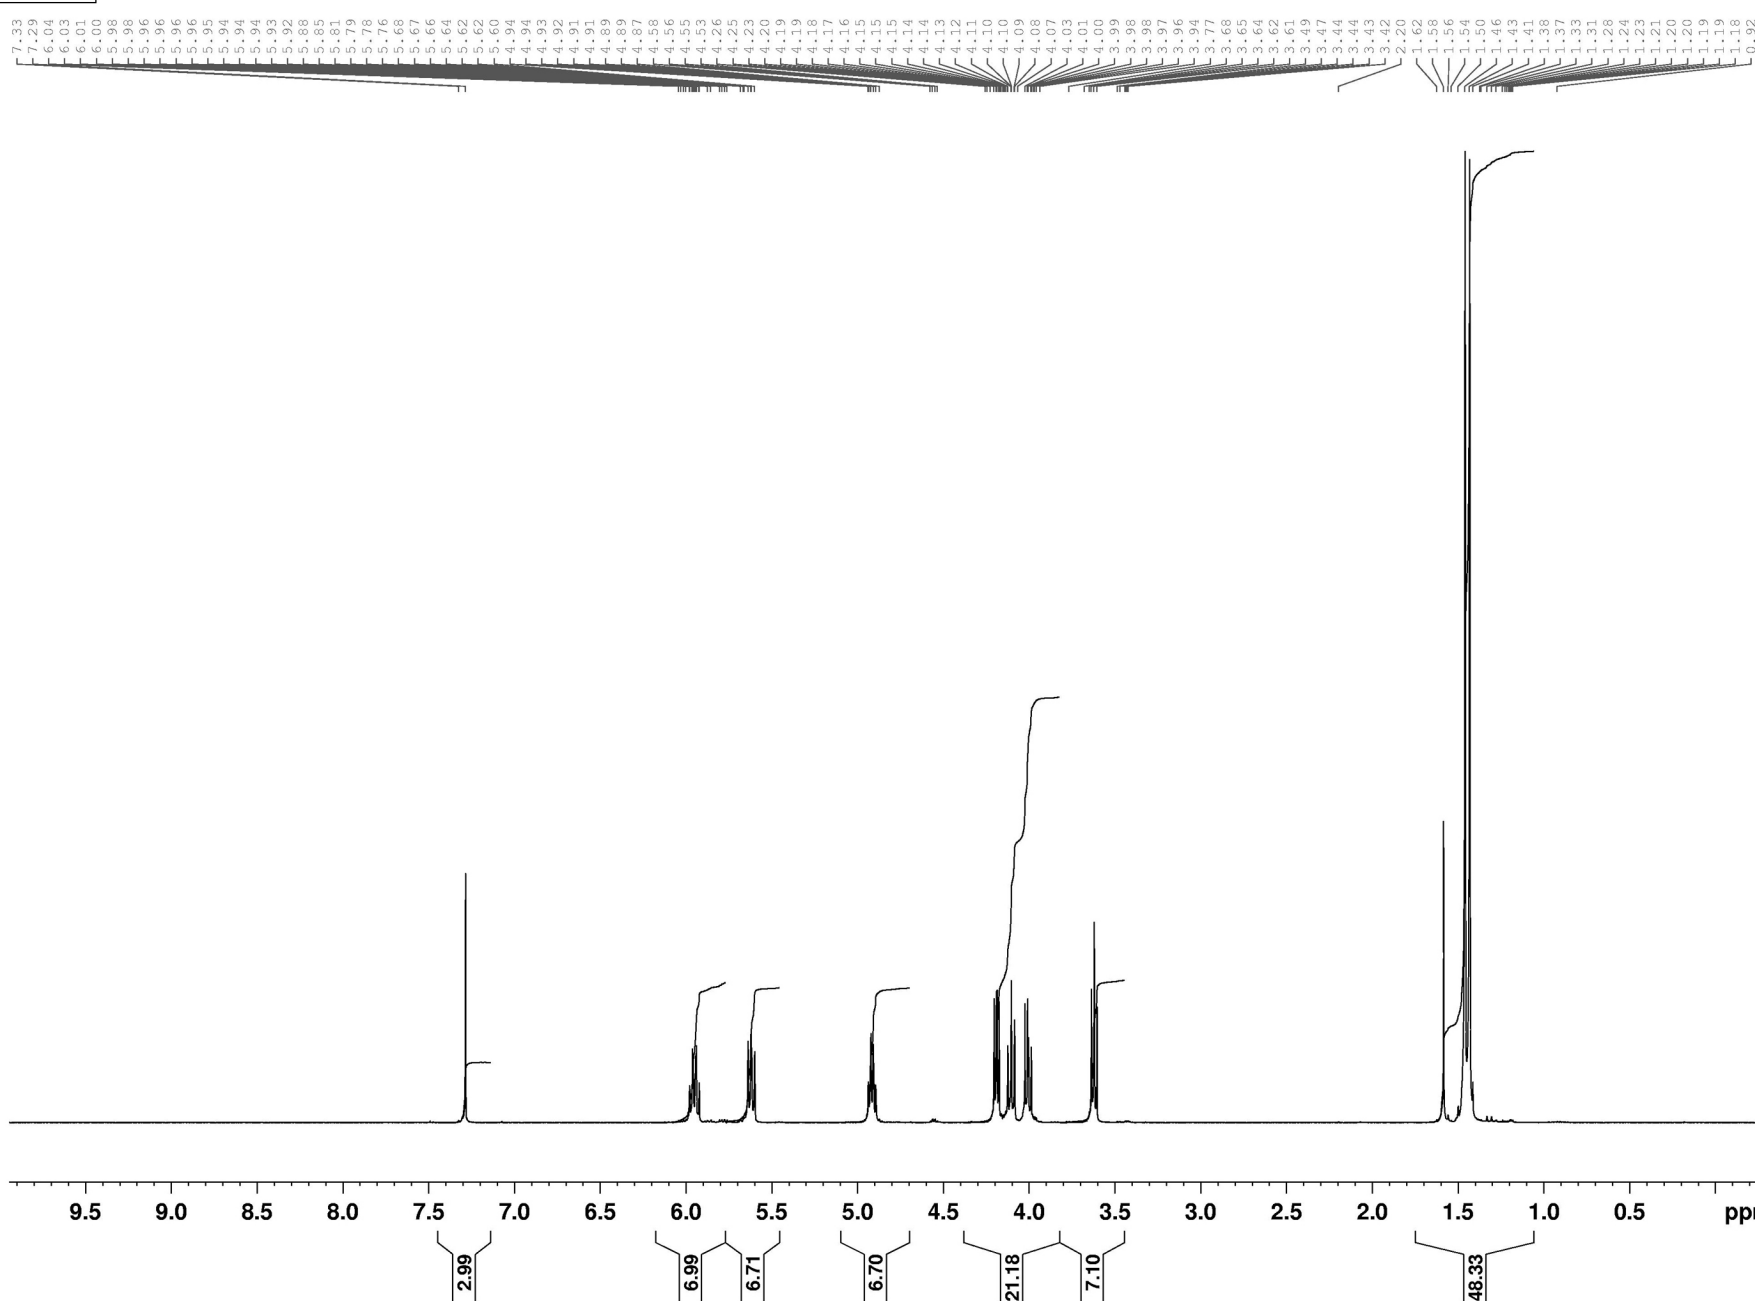

NAME May21-2008  
EXPNO 51  
PROCNO 1  
Date\_ 20080521  
Time 22.09  
INSTRUM drx500  
PROBHD 5 mm Multinu  
PULPROG zg30  
TD 82642  
SOLVENT CDCl3  
NS 16  
DS 2  
SWH 10330.578 Hz  
FIDRES 0.125004 Hz  
AQ 3.9999712 sec  
RG 456.1  
DW 48.400 use  
DE 6.00 use  
TE 300.0 K  
D1 1.00000000 sec

===== CHANNEL f1 ===  
NUC1 1H  
P1 15.50 use  
PL1 0.00 dB  
SF01 500.1330885 MHz  
SI 65536  
SF 500.1300000 MHz  
WDW EM  
SSB 0  
LB 0.30 Hz  
GB 0  
PC 1.00

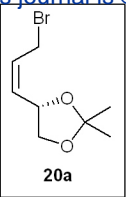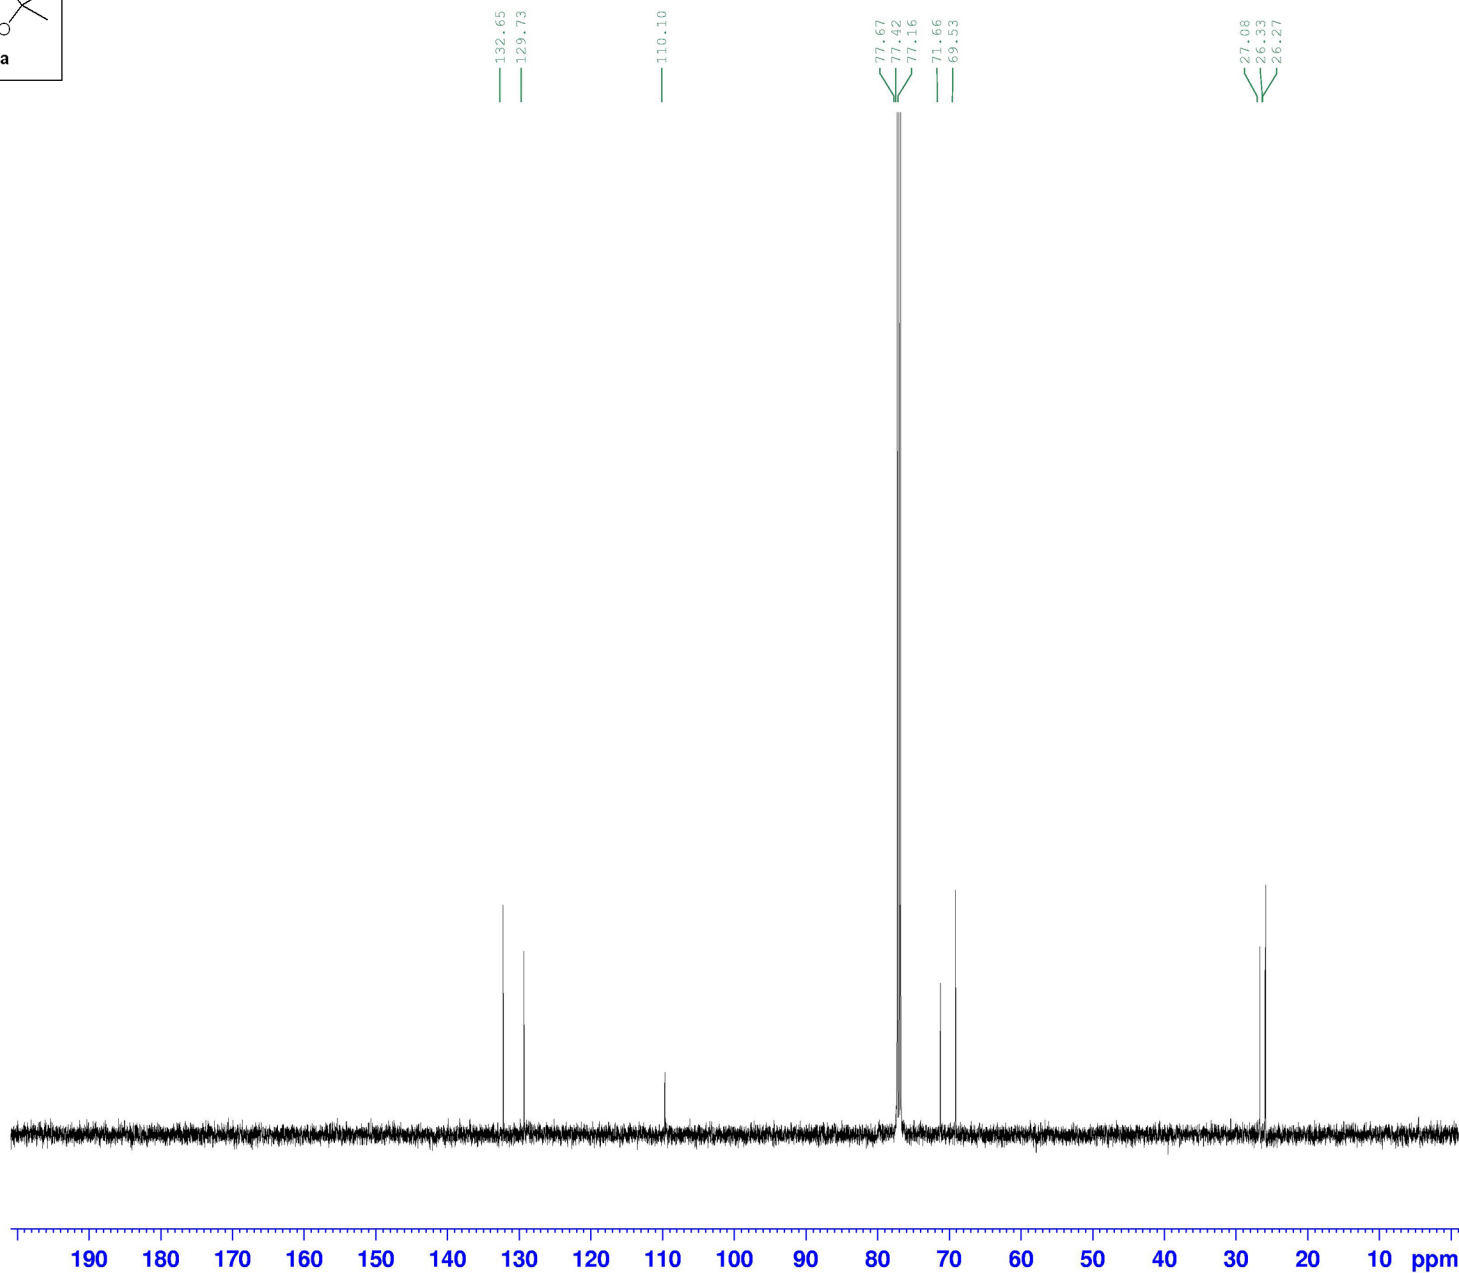

NAME May21-2008  
EXPNO 54  
PROCNO 1  
Date\_ 20080521  
Time 22.56  
INSTRUM drx500  
PROBHD 5 mm Multinu  
PULPROG zgpg30  
TD 65536  
SOLVENT CDCl3  
NS 256  
DS 4  
SWH 31446.541 Hz  
FIDRES 0.479836 Hz  
AQ 1.0420883 sec  
RG 3649.1  
DW 15.900 usec  
DE 6.00 usec  
TE 300.0 K  
D1 2.00000000 sec  
d11 0.03000000 sec  
d12 0.00002000 sec

===== CHANNEL f1 =====  
NUC1 13C  
P1 5.50 usec  
PL1 0.00 dB  
SFO1 125.7715719 MHz

===== CHANNEL f2 =====  
CPDPRG2 waltz16  
NUC2 1H  
PCPD2 95.00 usec  
PL2 0.00 dB  
PL12 19.00 dB  
PL13 19.00 dB  
SFO2 500.1320005 MHz  
SI 32768  
SF 125.7577934 MHz  
WDW EM  
SSB 0  
LB 1.00 Hz  
GB 0  
PC 1.40
