# Supplementary material for: Reversal of facial selectivity in a thia-Claisen rearrangement by incorporation of a vinylic bromine substituent
Source: Royal Society of Chemistry journal article supplement (doi:10.1039/c3ob41580e), 2013-01-01
Supplement: c3ob41580e_4.pdf [file c3ob41580e_4.pdf]

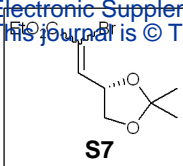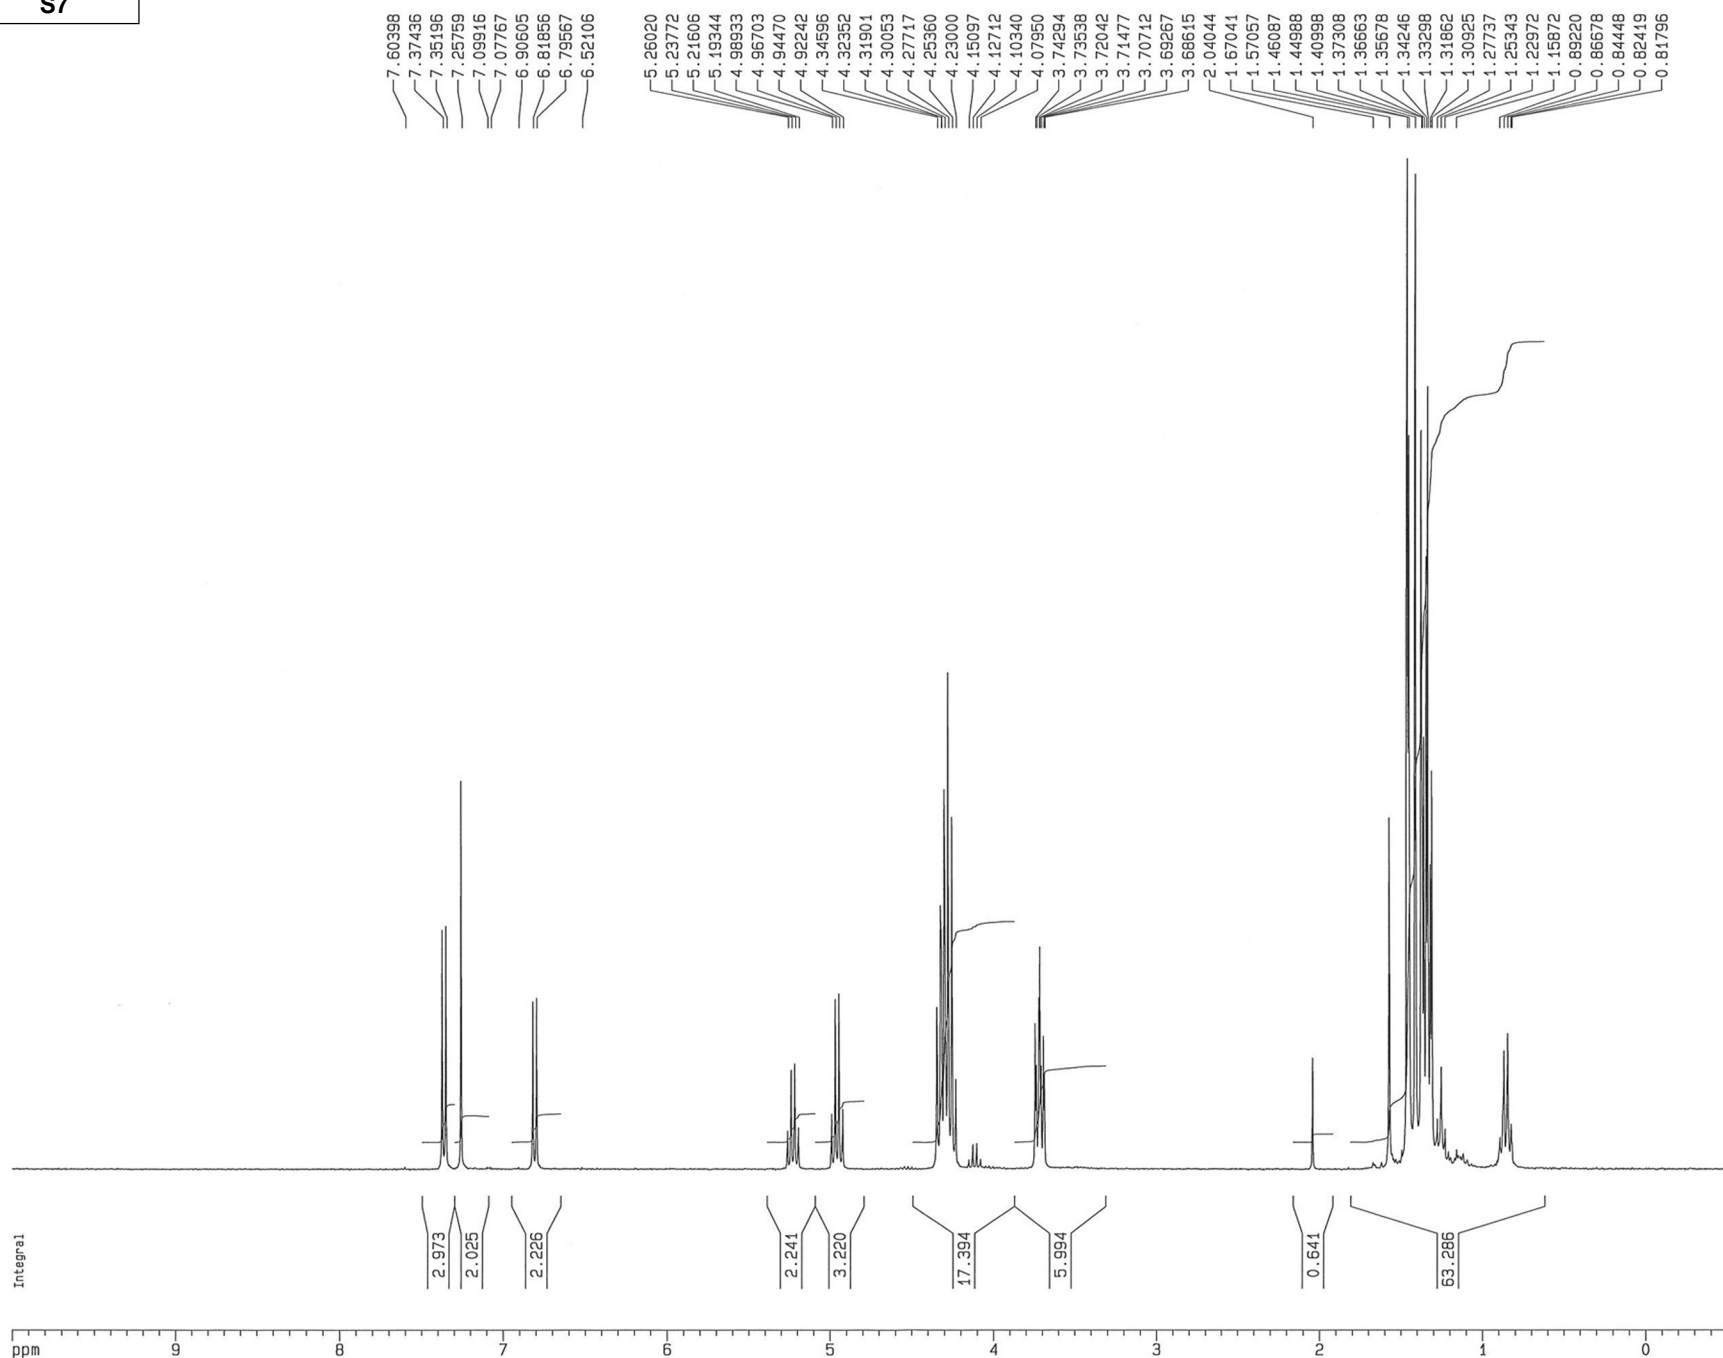

Current Data Parameters  
NAME Feb08-2008  
EXPNO 40  
PROCNO 1

F2 - Acquisition Parameters  
Date\_ 20080208  
Time 18.22  
INSTRUM amx300  
PROBHD 5 mm QNP 1H  
PULPROG zg30  
TD 53506  
SOLVENT CDC13  
RO 20  
NS 16  
R0 20  
SWH 8771.930 Hz  
FIDRES 0.163943 Hz  
AQ 3.0498919 sec  
RG 4096  
DW 57.000 usec  
DE 81.43 usec  
TE 300.0 K  
HL1 1 dB  
D1 0.12000000 sec  
P1 6.80 usec  
SF01 299.8758200 MHz  
NUCLEUS 1H

F2 - Processing parameters  
SI 32768  
SF 299.8727940 MHz  
WDW EM  
SSB 0  
LB 0.30 Hz  
GB 0  
PC 1.00  
SR 2794.00 Hz

1D NMR plot parameters  
CX 32.00 cm  
F1P 10.000 ppm  
F1 2998.73 Hz  
F2P -0.500 ppm  
F2 -149.94 Hz  
PPMCM 0.32812 ppm/cm  
HZCM 98.39577 Hz/cm

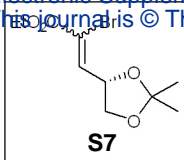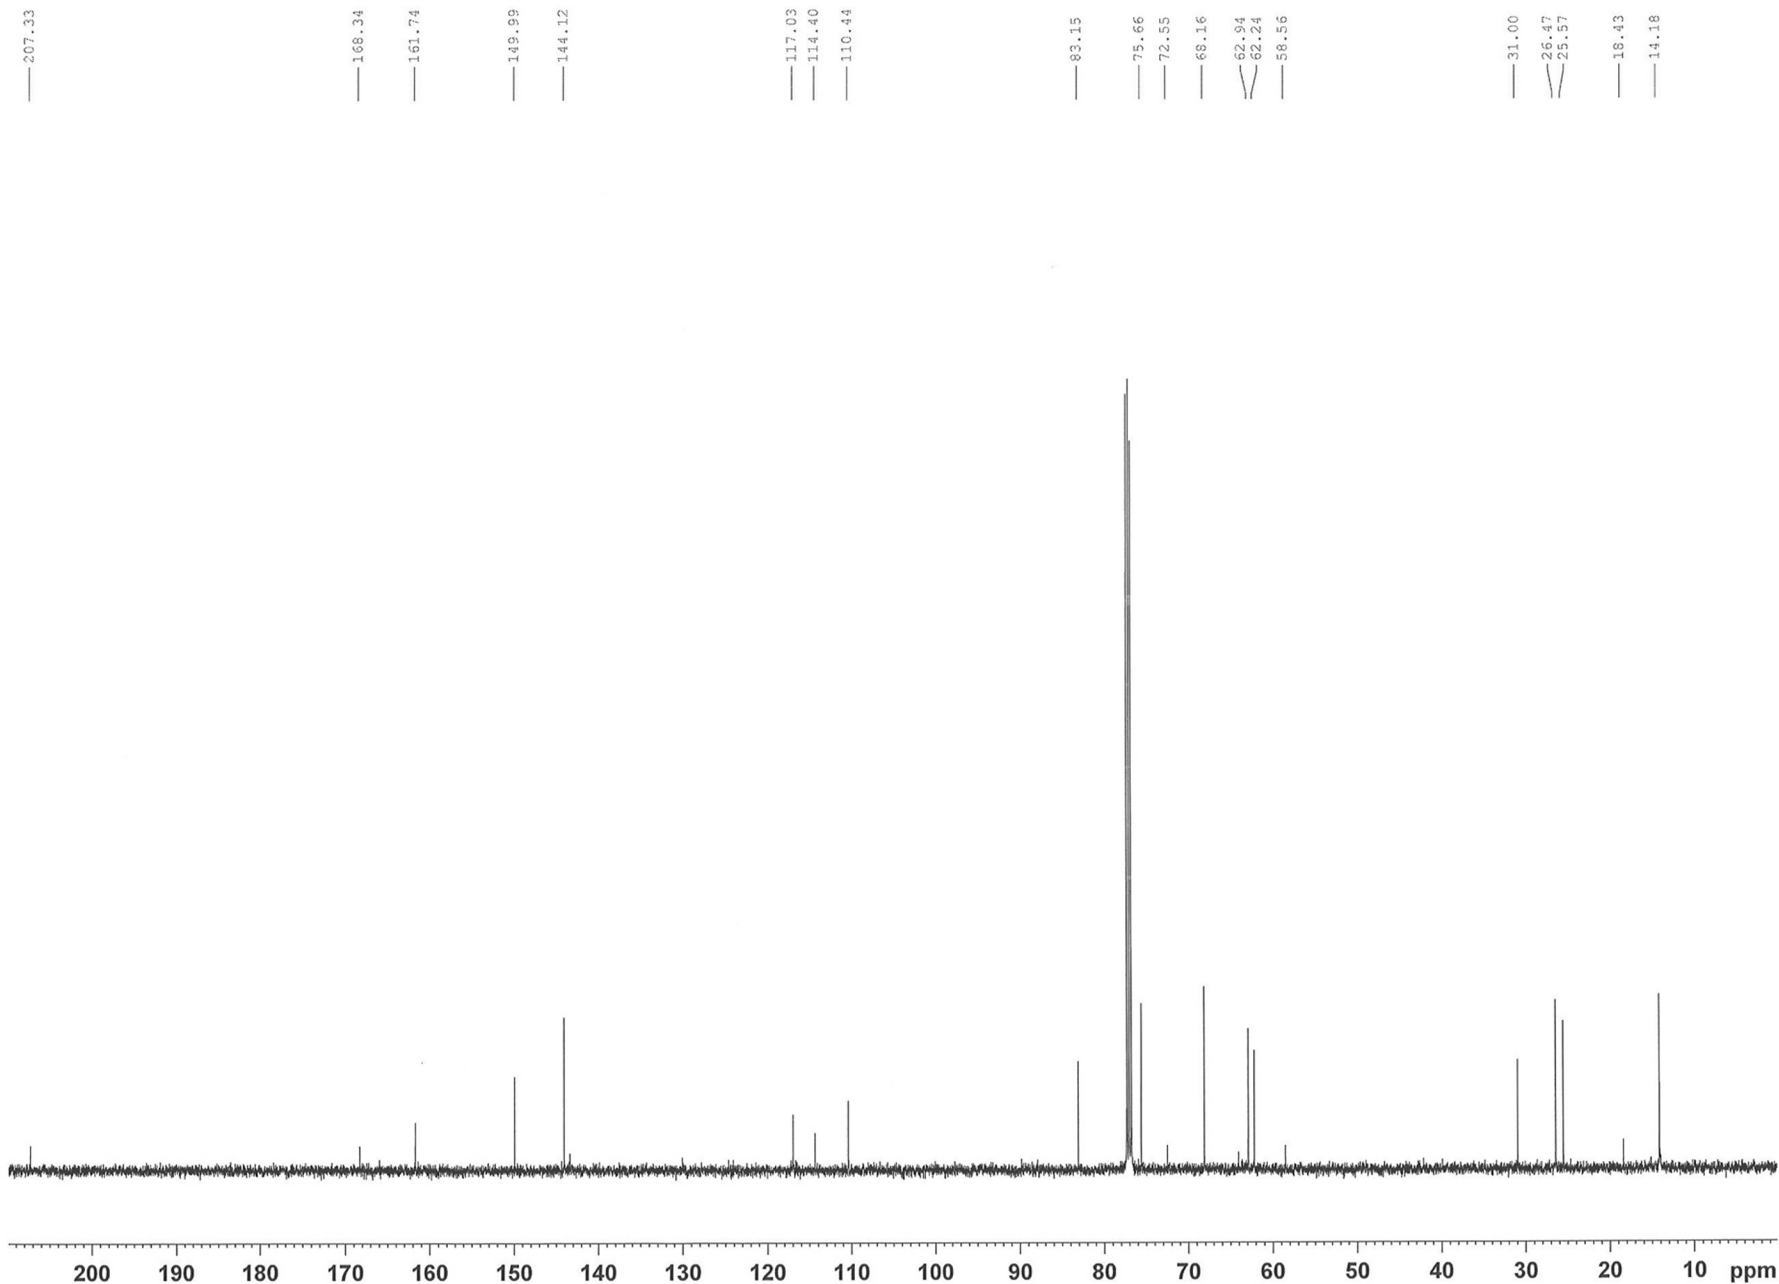

```

NAME      Jun05-2008
EXPNO      10
PROCNO      1
Date_      20080605
Time       20.07
INSTRUM     drx500
PROBHD      5 mm Multinu
PULPROG     zgpg30
TD          65536
SOLVENT     CDC13
NS          256
DS          4
SWH         31446.541 Hz
FIDRES      0.479836 Hz
AQ          1.0420883 sec
RG          3649.1
DW          15.900 usec
DE          6.00 usec
TE          300.0 K
D1          2.00000000 sec
d11         0.03000000 sec
d12         0.00002000 sec
    
```

```

===== CHANNEL f1 =====
NUC1        13C
P1          5.50 usec
PL1         0.00 dB
SFO1        125.7715719 MHz
    
```

```

===== CHANNEL f2 =====
CPDPRG2     waltz16
NUC2        1H
PCPD2       95.00 usec
PL2         0.00 dB
PL12        19.00 dB
PL13        19.00 dB
SFO2        500.1320005 MHz
SI          32768
SF          125.7577814 MHz
WDW         EM
SSB         0
LB          1.00 Hz
GB          0
PC          1.40
    
```

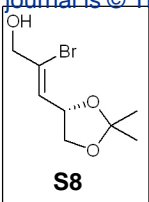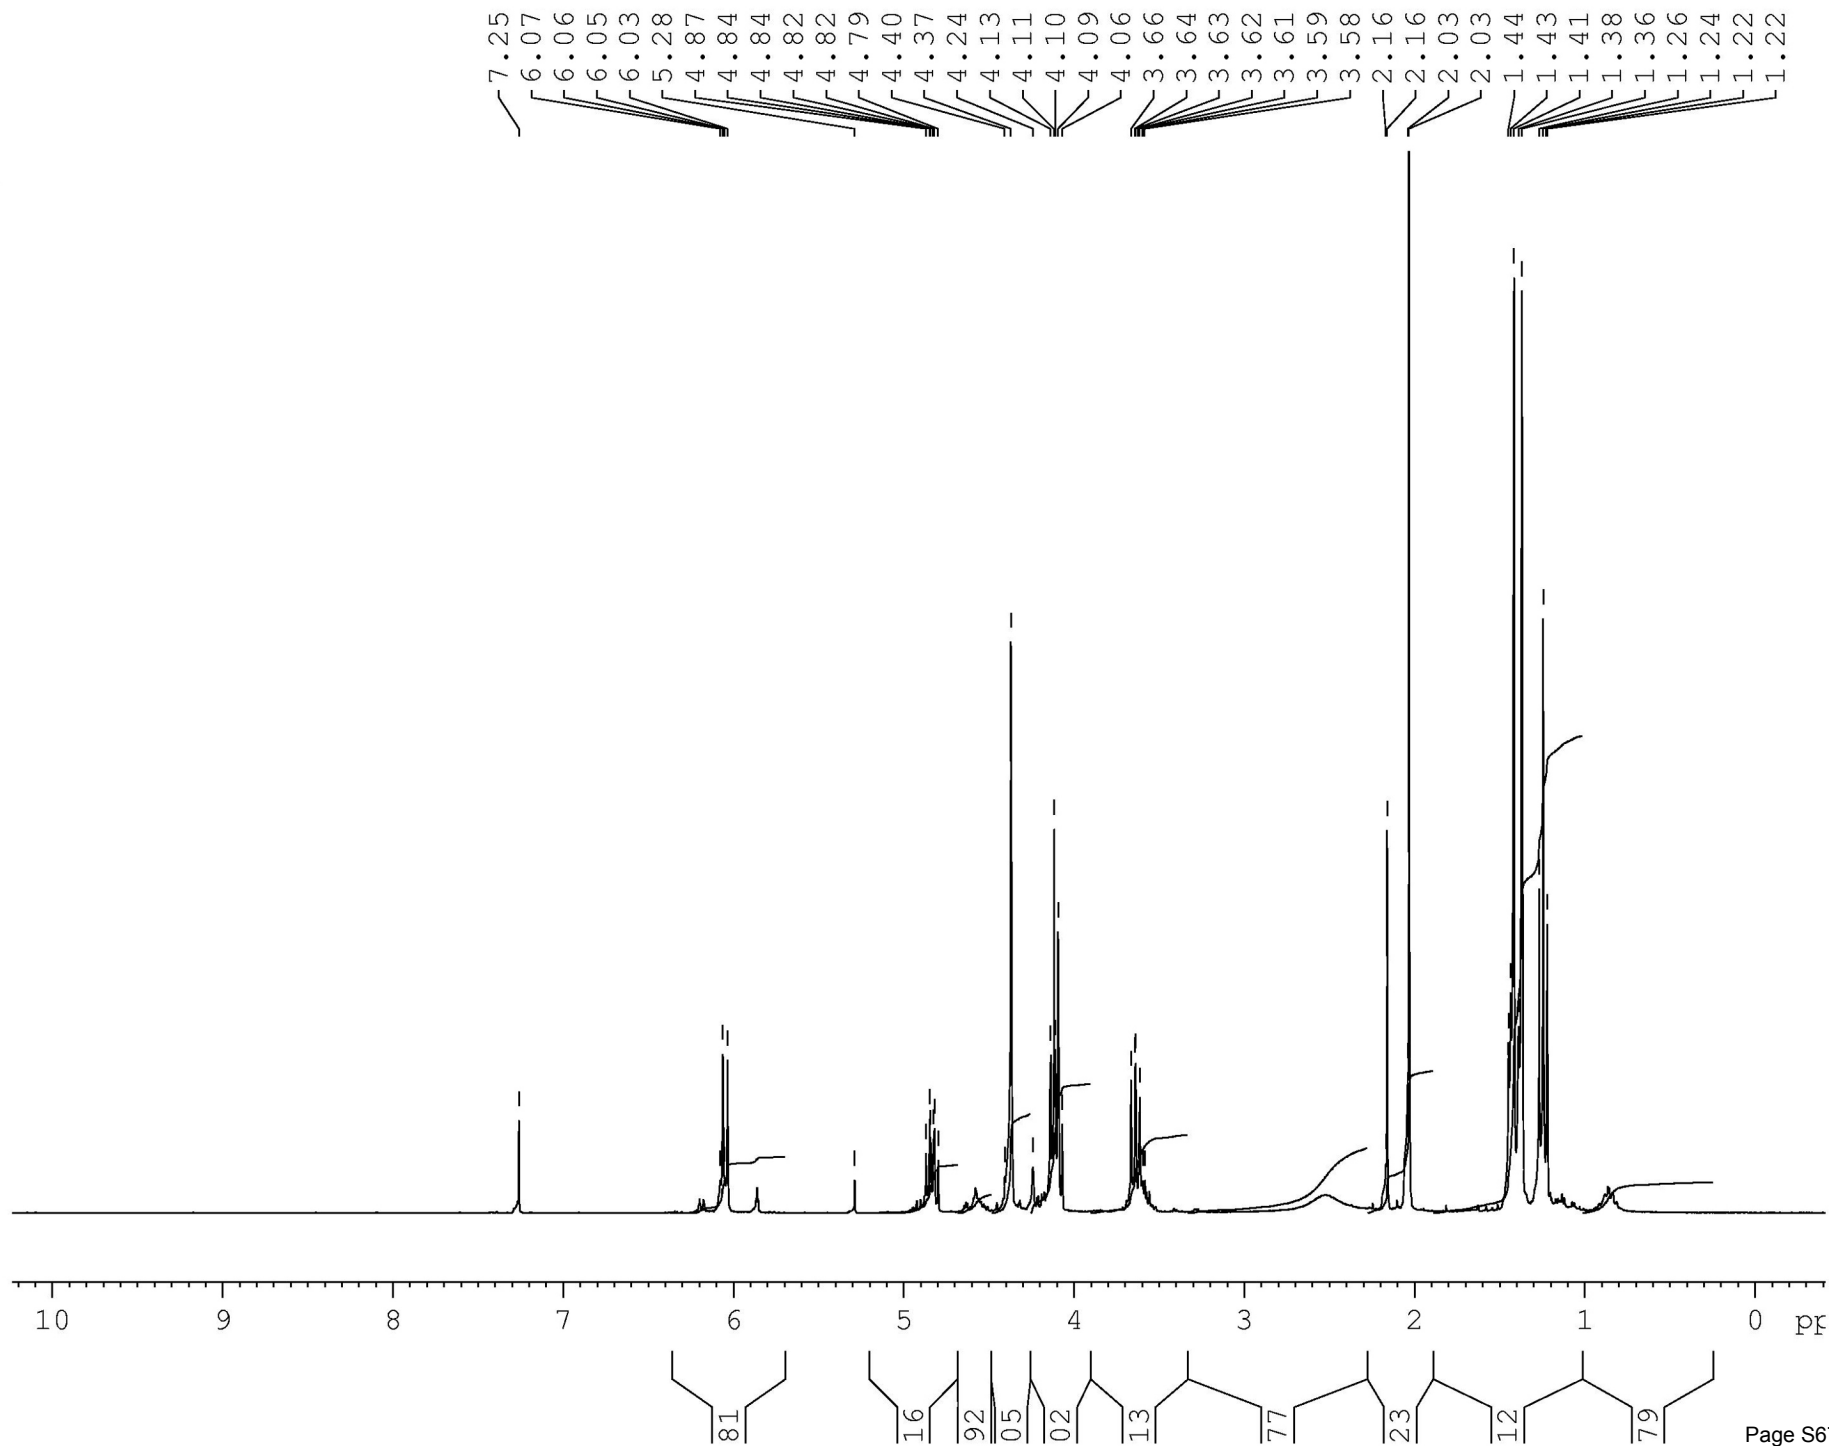

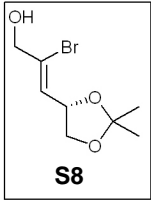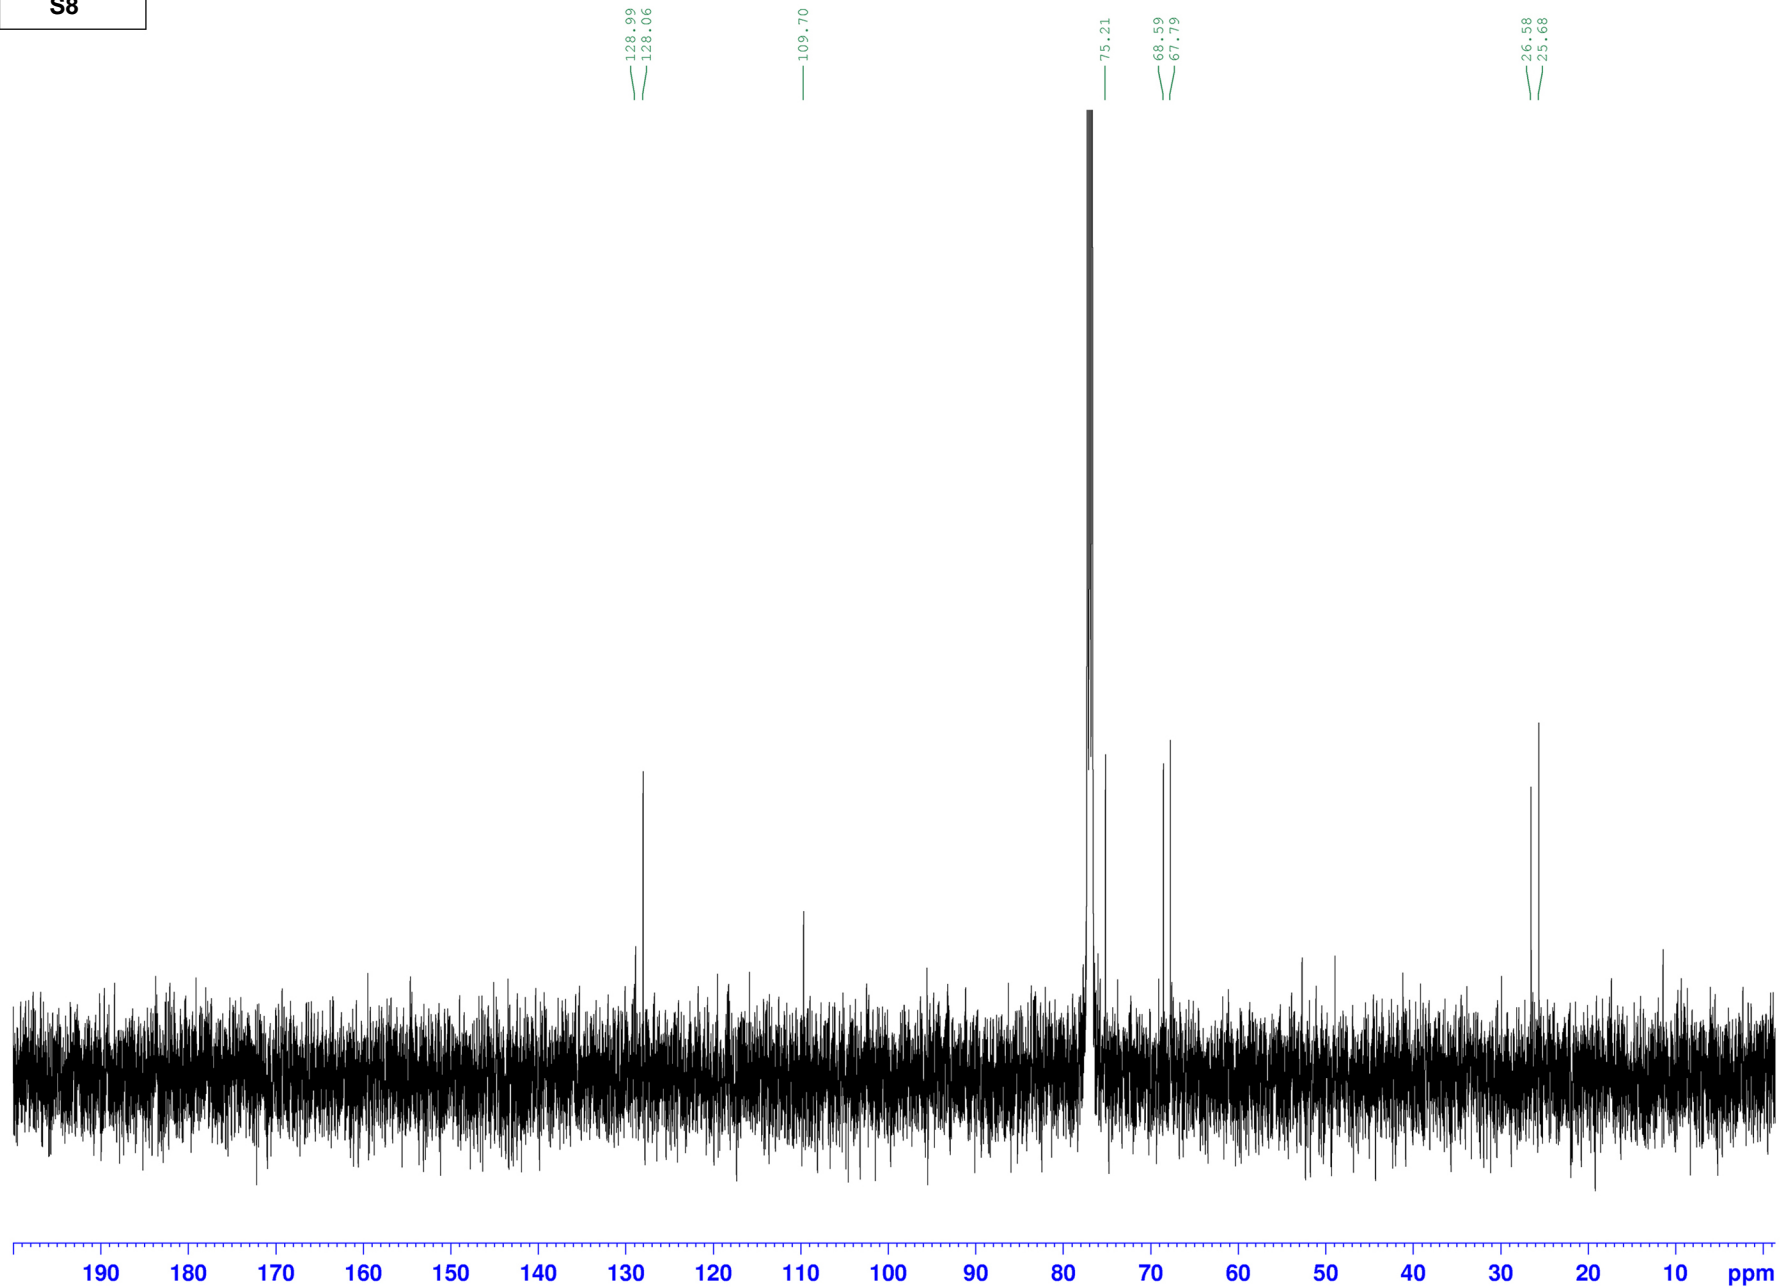

NAME Apr25-2009  
EXPNO 10  
PROCNO 1  
Date\_ 20090425  
Time 19.22  
INSTRUM drx500  
PROBHD 5 mm Multinu  
PULPROG zgpg30  
TD 65536  
SOLVENT CDC13  
NS 2056  
DS 4  
SWH 31446.541 Hz  
FIDRES 0.479836 Hz  
AQ 1.0420883 sec  
RG 4096  
DW 15.900 use  
DE 6.00 use  
TE 300.0 K  
D1 2.00000000 sec  
d11 0.03000000 sec  
d12 0.00002000 sec

===== CHANNEL f1 ===  
NUC1 13C  
P1 5.50 use  
PL1 0.00 dB  
SF01 125.7715719 MHz

===== CHANNEL f2 ===  
CPDPRG2 waltz16  
NUC2 1H  
PCPD2 95.00 use  
PL2 0.00 dB  
PL12 19.00 dB  
PL13 19.00 dB  
SF02 500.1320005 MHz  
SI 32768  
SF 125.7577911 MHz  
WDW EM  
SSB 0  
LB 1.00 Hz  
GB 0  
PC 1.40

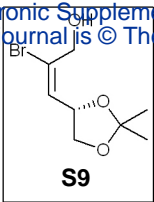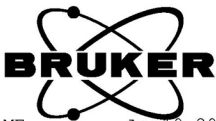

NAME Apr10-2008  
EXPNO 50  
PROCNO 1  
Date\_ 20080410  
Time 13.56  
INSTRUM drx500  
PROBHD 5 mm Multinu  
PULPROG zg30  
TD 82642  
SOLVENT CDCl3  
NS 16  
DS 2  
SWH 10330.578 Hz  
FIDRES 0.125004 Hz  
AQ 3.9999712 sec  
RG 181  
DW 48.400 use  
DE 6.00 use  
TE 300.0 K  
D1 1.0000000 sec

===== CHANNEL f1 ===  
NUC1 1H  
P1 15.50 use  
PL1 0.00 dB  
SF01 500.1330885 MHz  
SI 65536  
SF 500.1300000 MHz  
WDW EM  
SSB 0  
LB 0.30 Hz  
GB 0  
PC 1.00

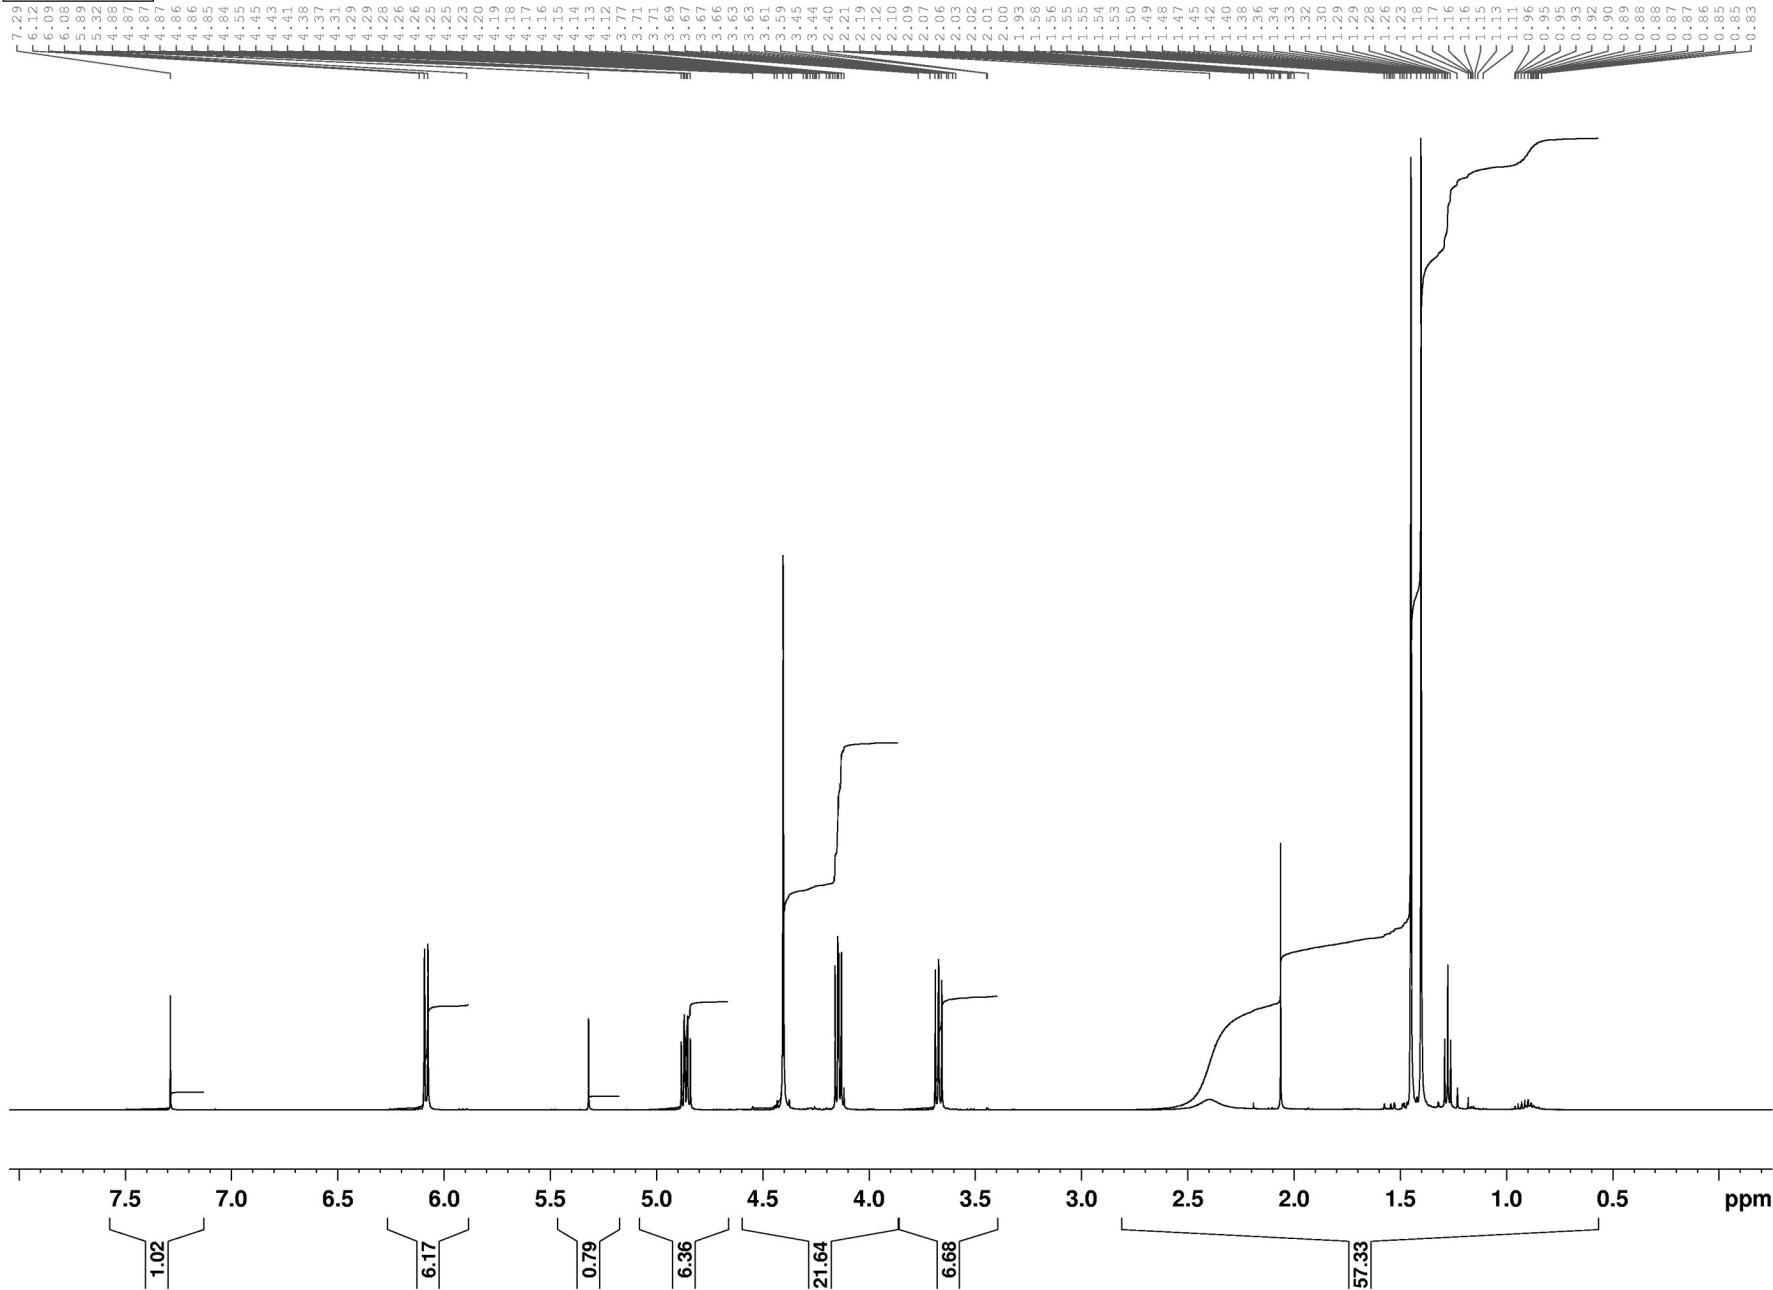

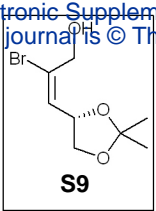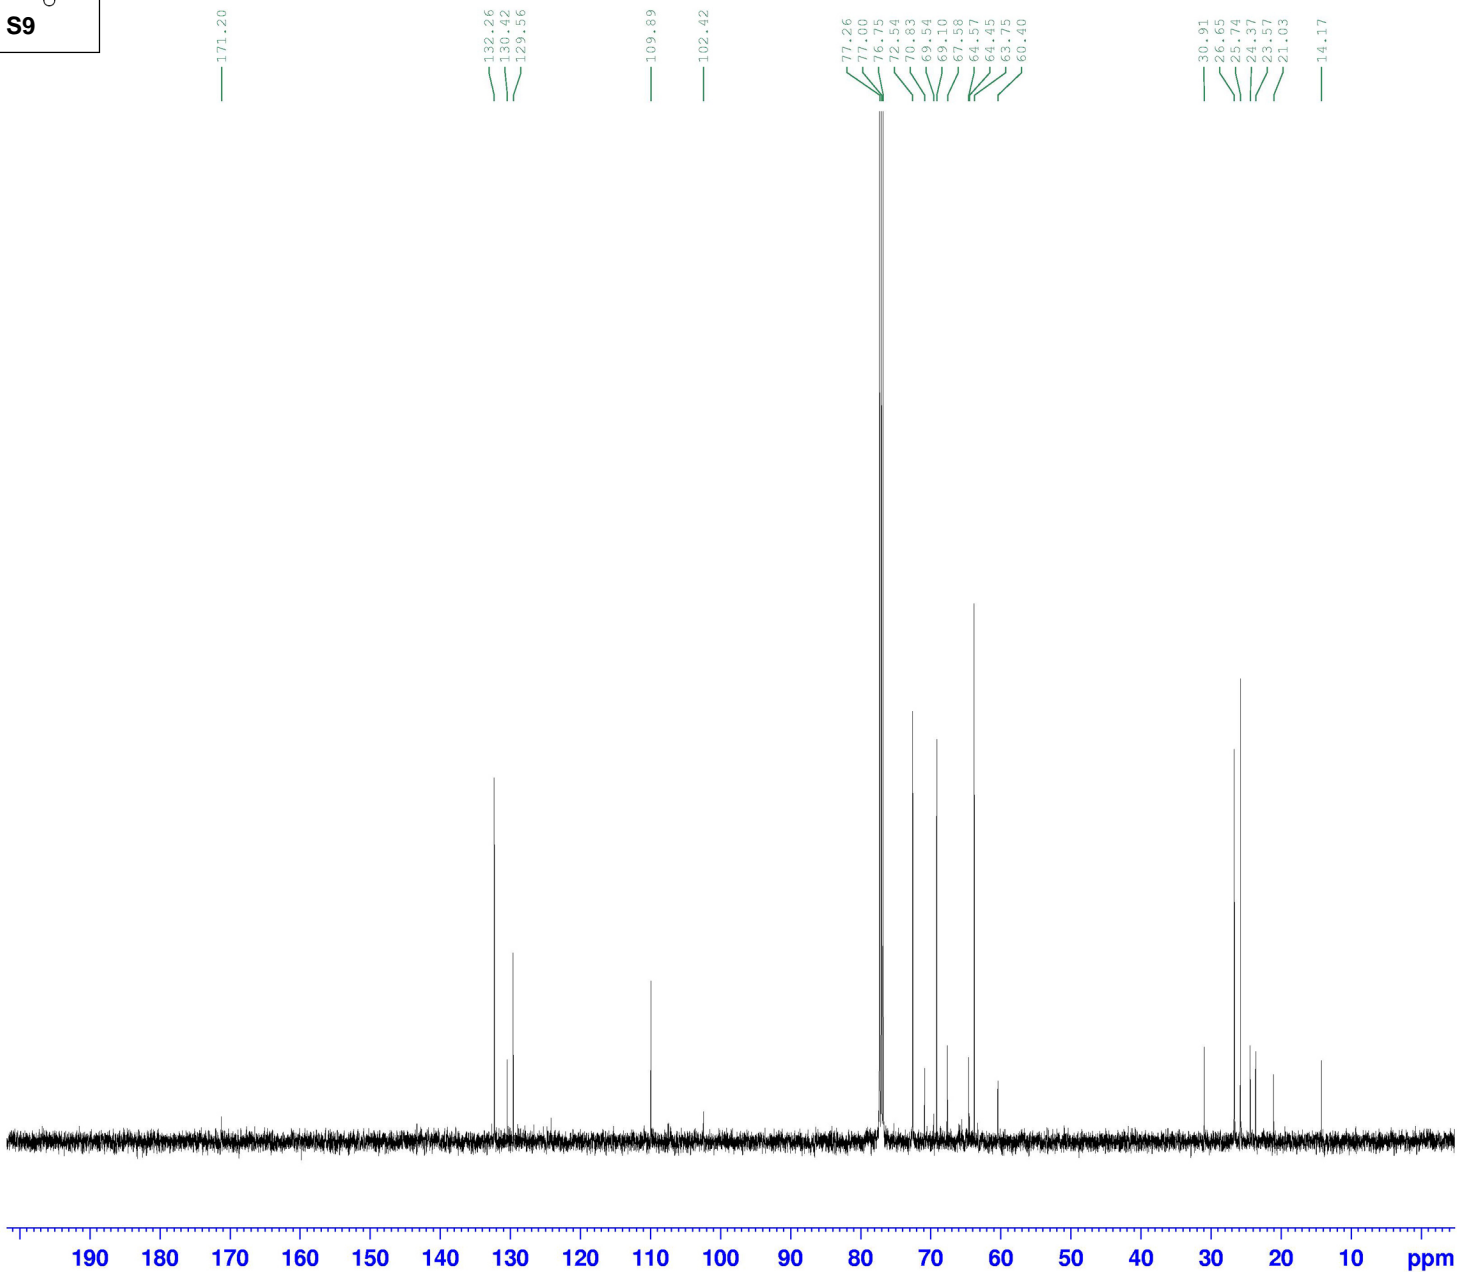

NAME Apr10-2008  
EXPNO 51  
PROCNO 1  
Date\_ 20080411  
Time 1.56  
INSTRUM drx500  
PROBHD 5 mm Multinu  
PULPROG zgpg30  
TD 65536  
SOLVENT CDCl3  
NS 256  
DS 4  
SWH 31446.541 Hz  
FIDRES 0.479836 Hz  
AQ 1.0420883 sec  
RG 3649.1  
DW 15.900 usec  
DE 6.00 usec  
TE 300.0 K  
D1 2.00000000 sec  
d11 0.03000000 sec  
d12 0.00002000 sec

===== CHANNEL f1 =====  
NUC1 13C  
P1 5.50 usec  
PL1 0.00 dB  
SFO1 125.7715719 MHz

===== CHANNEL f2 =====  
CPDPRG2 waltz16  
NUC2 1H  
PCPD2 95.00 usec  
PL2 0.00 dB  
PL12 19.00 dB  
PL13 19.00 dB  
SFO2 500.1320005 MHz  
SI 32768  
SF 125.7577922 MHz  
WDW EM  
SSB 0  
LB 1.00 Hz  
GB 0  
PC 1.40

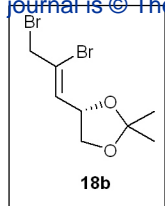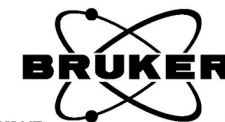

NAME ae065  
EXPNO 1  
PROCNO 1  
Date\_ 20080215  
Time 13.35  
INSTRUM drx500  
PROBHD 5 mm Multinu  
PULPROG zg30  
TD 82642  
SOLVENT CDCl3  
NS 16  
DS 2  
SWH 10330.578 Hz  
FIDRES 0.125004 Hz  
AQ 3.9999712 sec  
RG 574.7  
DW 48.400 use  
DE 6.00 use  
TE 300.0 K  
D1 1.00000000 sec

===== CHANNEL f1 ===  
NUC1 1H  
P1 15.50 use  
PL1 0.00 dB  
SF01 500.1330885 MHz  
SI 131072  
SF 500.1300000 MHz  
WDW EM  
SSB 0  
LB 0.30 Hz  
GB 0  
PC 1.00

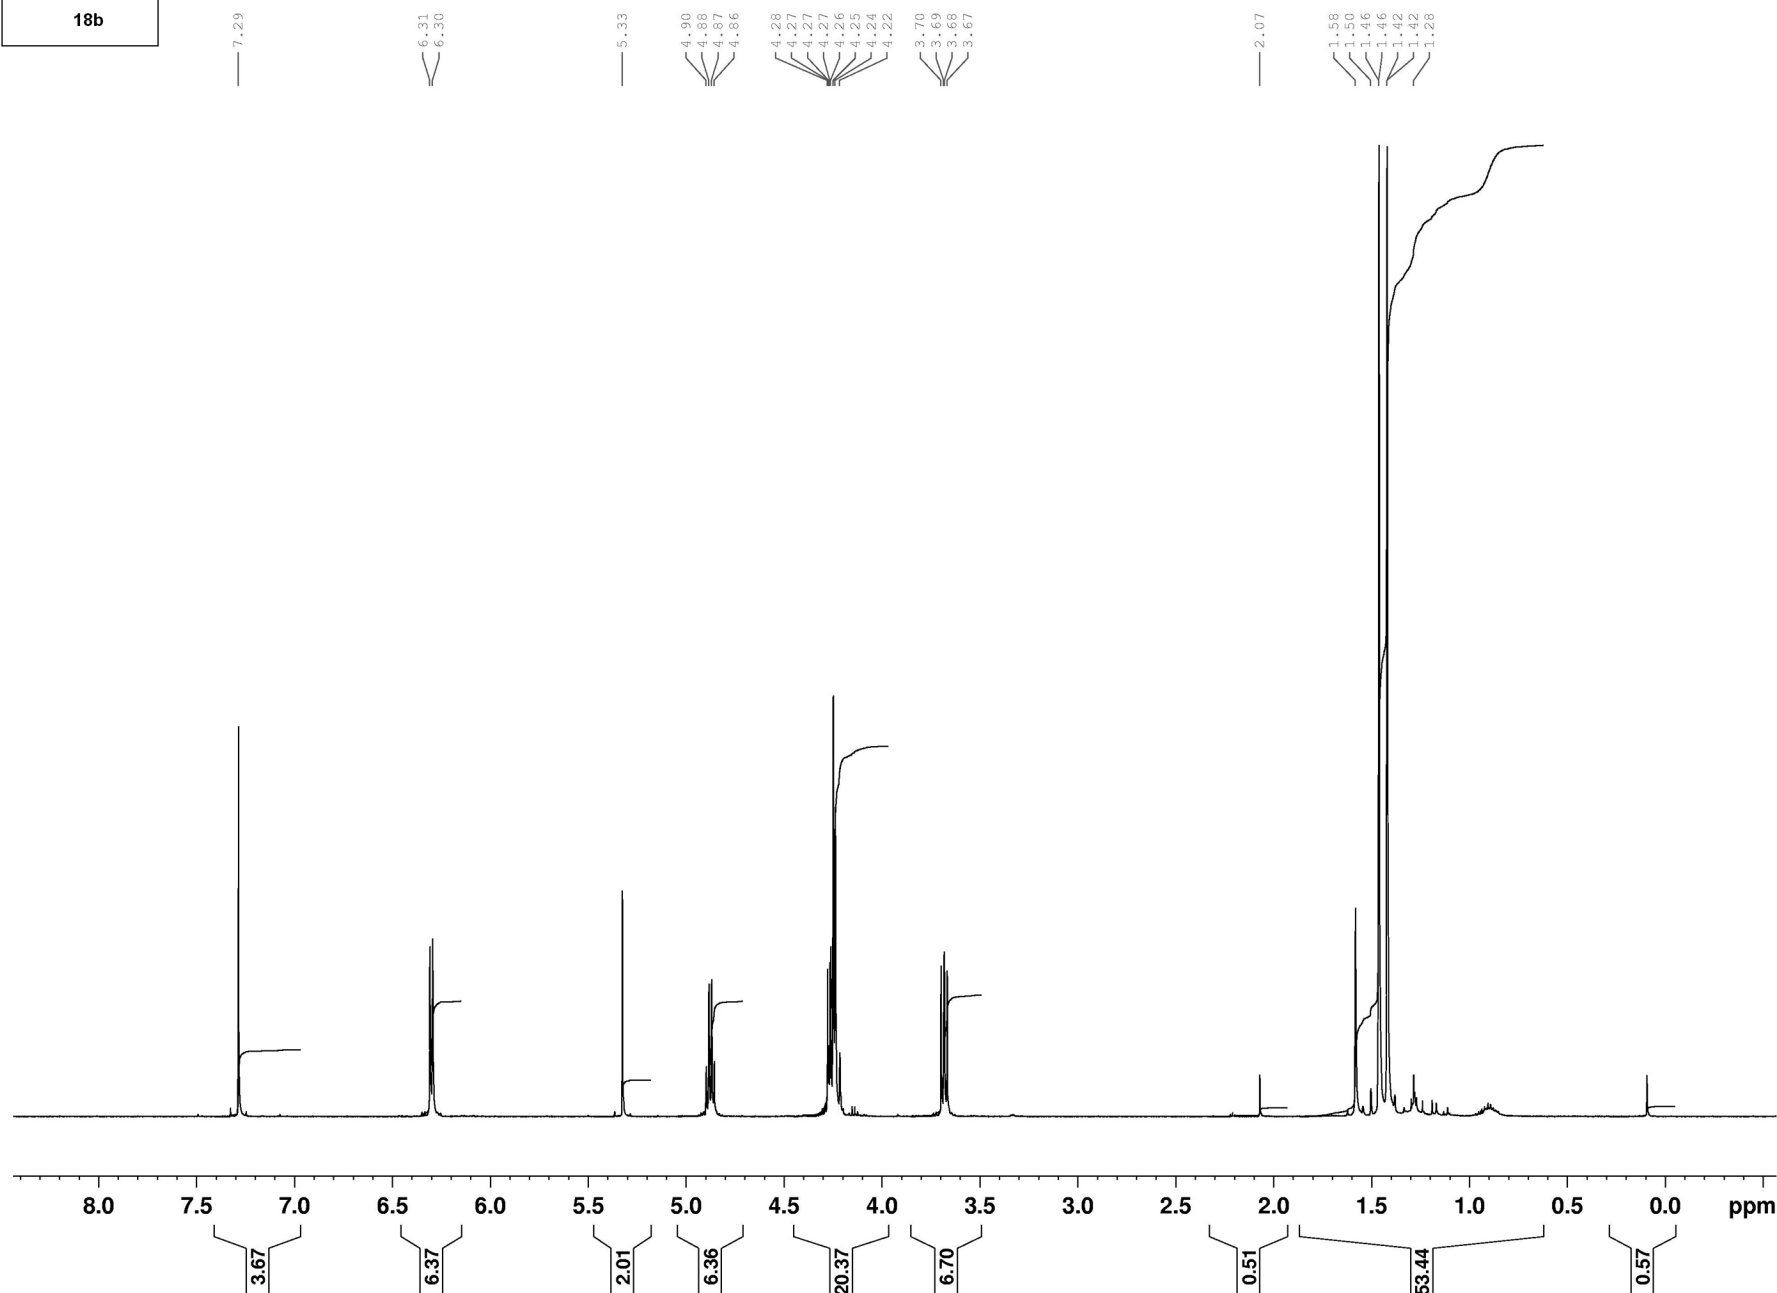

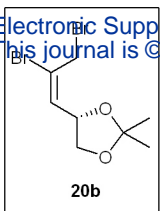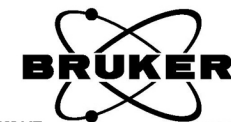

```

NAME          aeo40
EXPNO         1
PROCNO        1
Date_         20071207
Time          17.00
INSTRUM       drx500
PROBHD        5 mm Multinu
PULPROG       zg30
TD            82642
SOLVENT       CDCl3
NS            16
DS            2
SWH           10330.578 Hz
FIDRES        0.125004 Hz
AQ            3.9999712 sec
RG            645.1
DW            48.400 use
DE            6.00 use
TE            300.0 K
D1            1.00000000 sec
  
```

```

===== CHANNEL f1 =====
NUC1          1H
P1            14.80 use
PL1           0.00 dB
SF01          500.1330885 MHz
SI            131072
SF            500.1300000 MHz
WDW           EM
SSB           0
LB            0.30 Hz
GB            0
PC            1.00
  
```

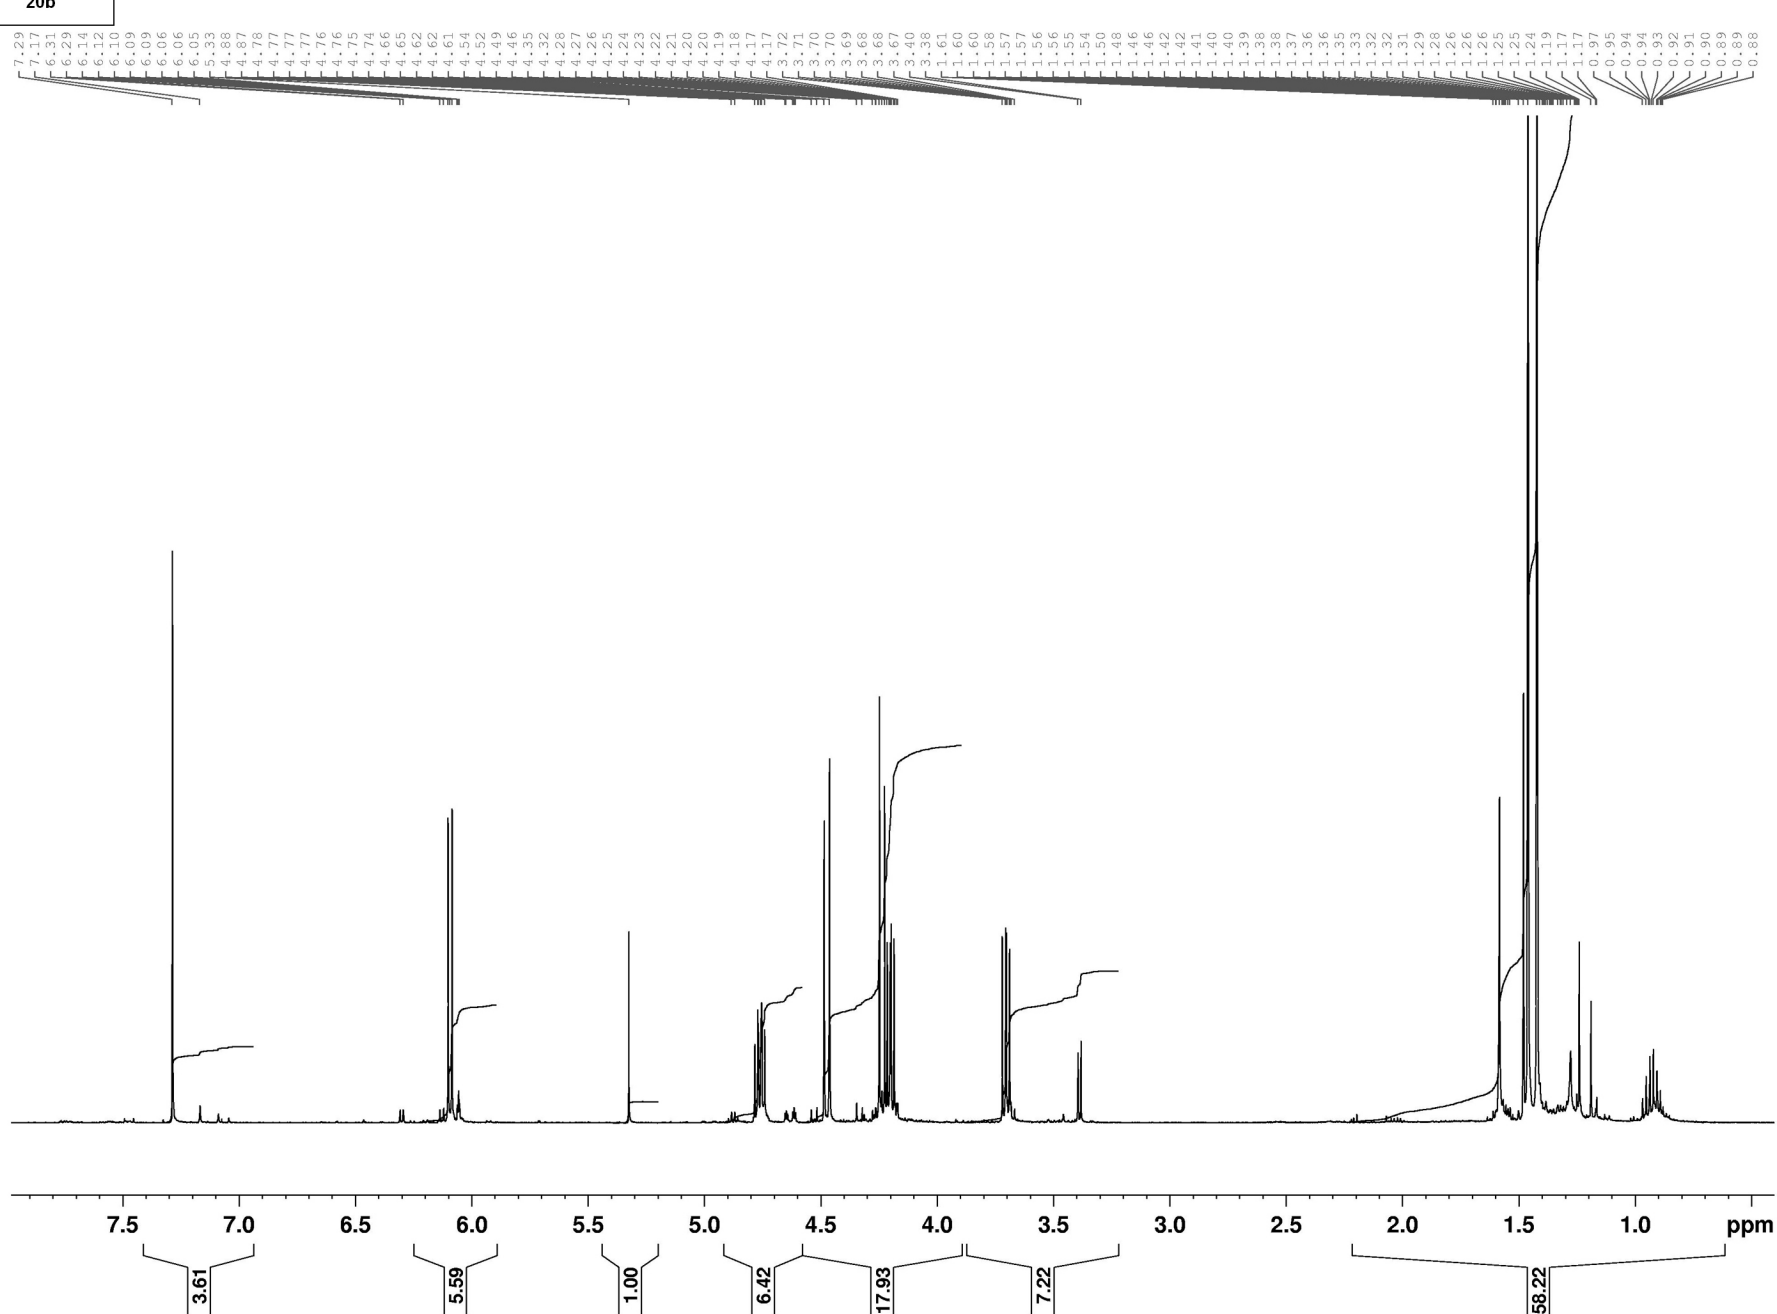

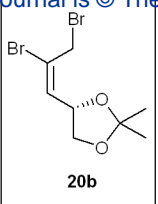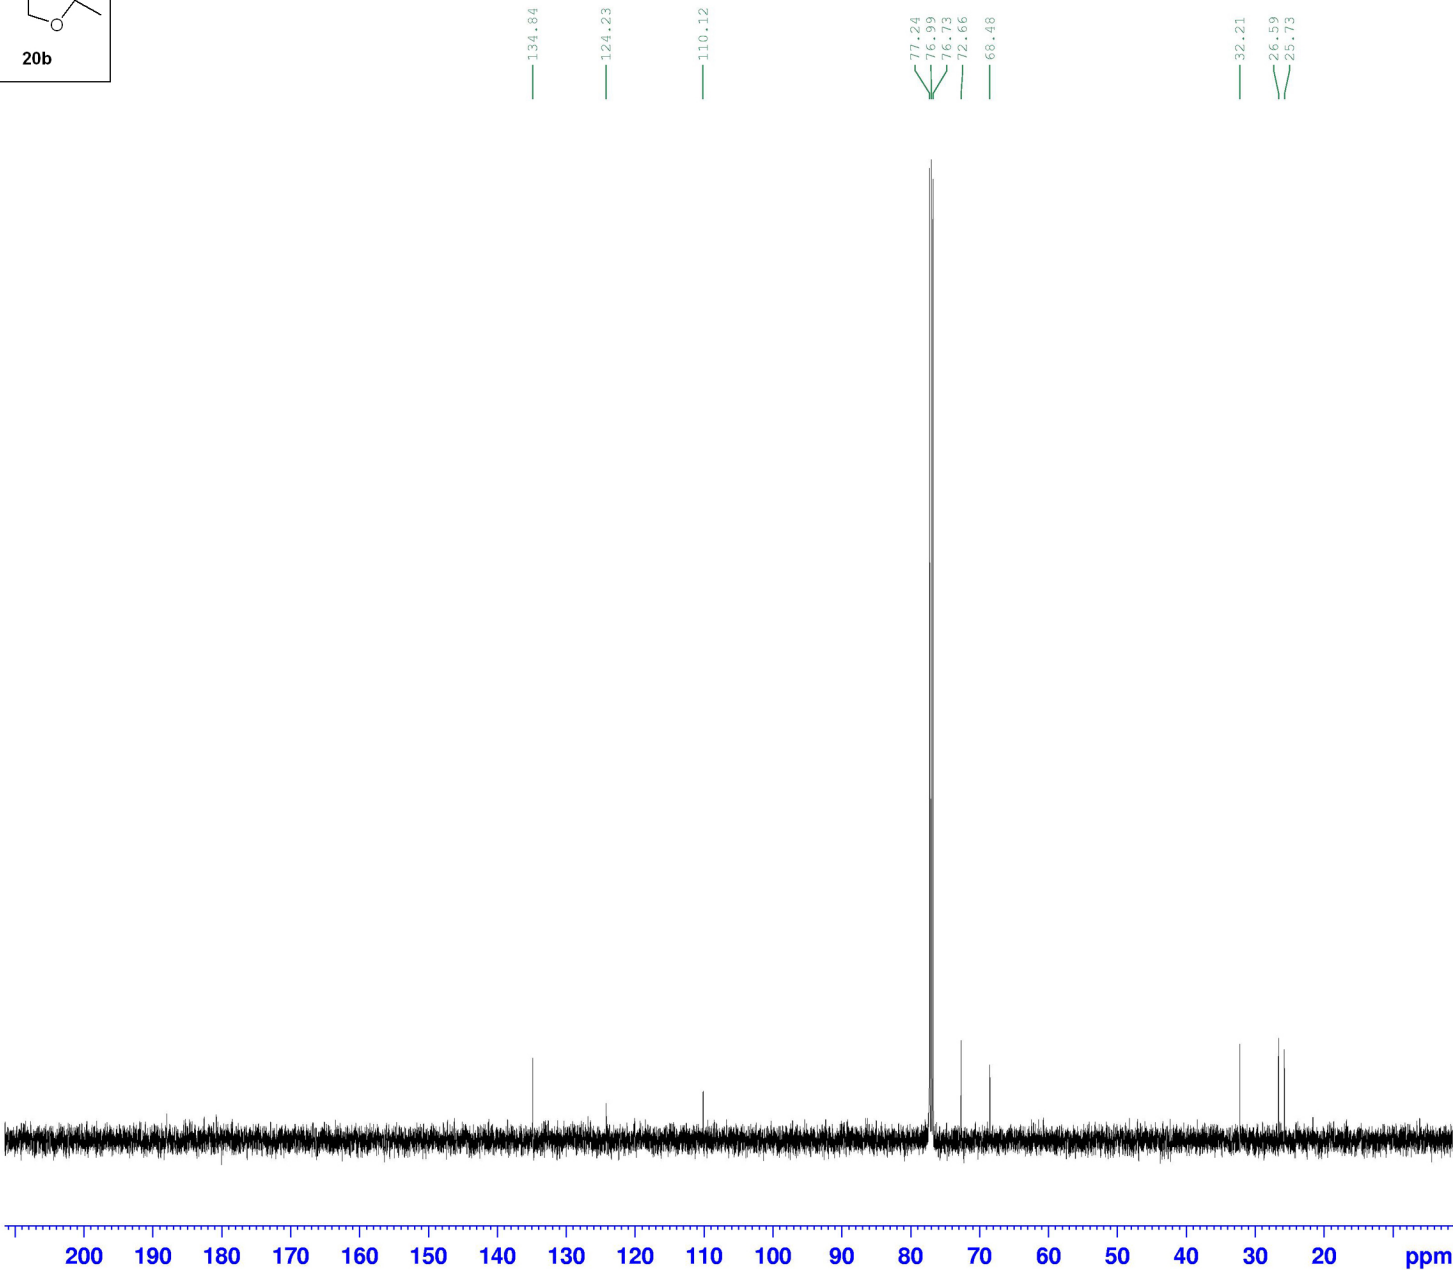

NAME aeo40  
EXPNO 2  
PROCNO 1  
Date\_ 20071207  
Time 17.03  
INSTRUM drx500  
PROBHD 5 mm Multinu  
PULPROG zgpg30  
TD 65536  
SOLVENT CDCl3  
NS 75  
DS 4  
SWH 31446.541 Hz  
FIDRES 0.479836 Hz  
AQ 1.0420883 sec  
RG 3251  
DW 15.900 usec  
DE 6.00 usec  
TE 300.0 K  
D1 2.00000000 sec  
d11 0.03000000 sec  
d12 0.00002000 sec

===== CHANNEL f1 =====  
NUC1 13C  
P1 5.10 usec  
PL1 0.00 dB  
SFO1 125.7715719 MHz

===== CHANNEL f2 =====  
CPDPRG2 waltz16  
NUC2 1H  
PCPD2 95.00 usec  
PL2 0.00 dB  
PL12 19.00 dB  
PL13 19.00 dB  
SFO2 500.1320005 MHz  
SI 131072  
SF 125.7577939 MHz  
WDW EM  
SSB 0  
LB 1.00 Hz  
GB 0  
PC 1.40

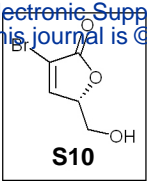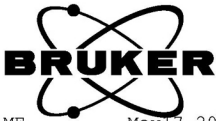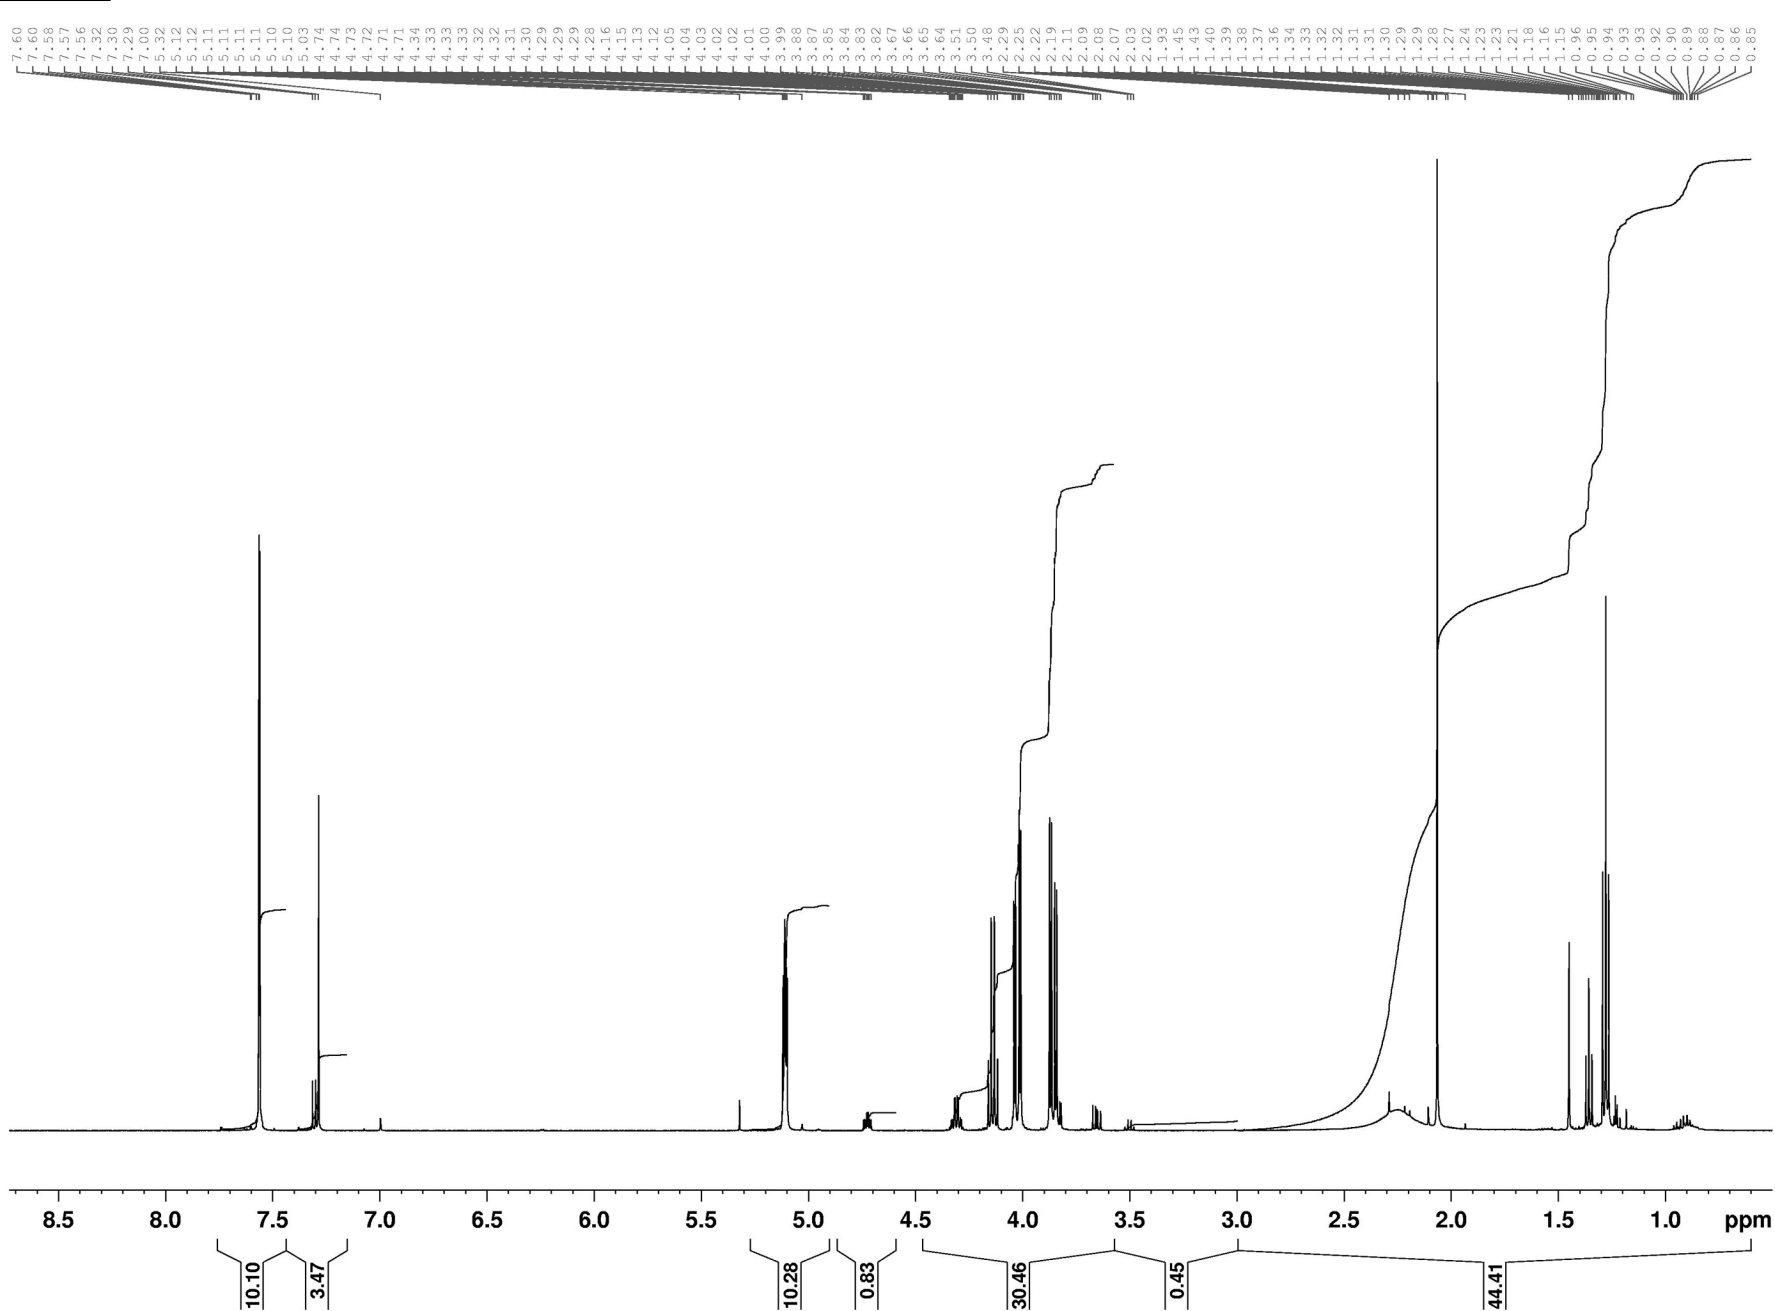

NAME May17-2008  
EXPNO 10  
PROCNO 1  
Date\_ 20080517  
Time 19.04  
INSTRUM drx500  
PROBHD 5 mm Multinu  
PULPROG zg30  
TD 82642  
SOLVENT CDCl3  
NS 16  
DS 2  
SWH 10330.578 Hz  
FIDRES 0.125004 Hz  
AQ 3.9999712 sec  
RG 362  
DW 48.400 use  
DE 6.00 use  
TE 300.0 K  
D1 1.00000000 sec

===== CHANNEL f1 =====  
NUC1 1H  
P1 15.50 use  
PL1 0.00 dB  
SF01 500.1330885 MHz  
SI 65536  
SF 500.1300000 MHz  
WDW EM  
SSB 0  
LB 0.30 Hz  
GB 0  
PC 1.00

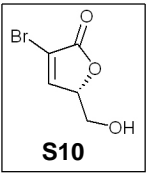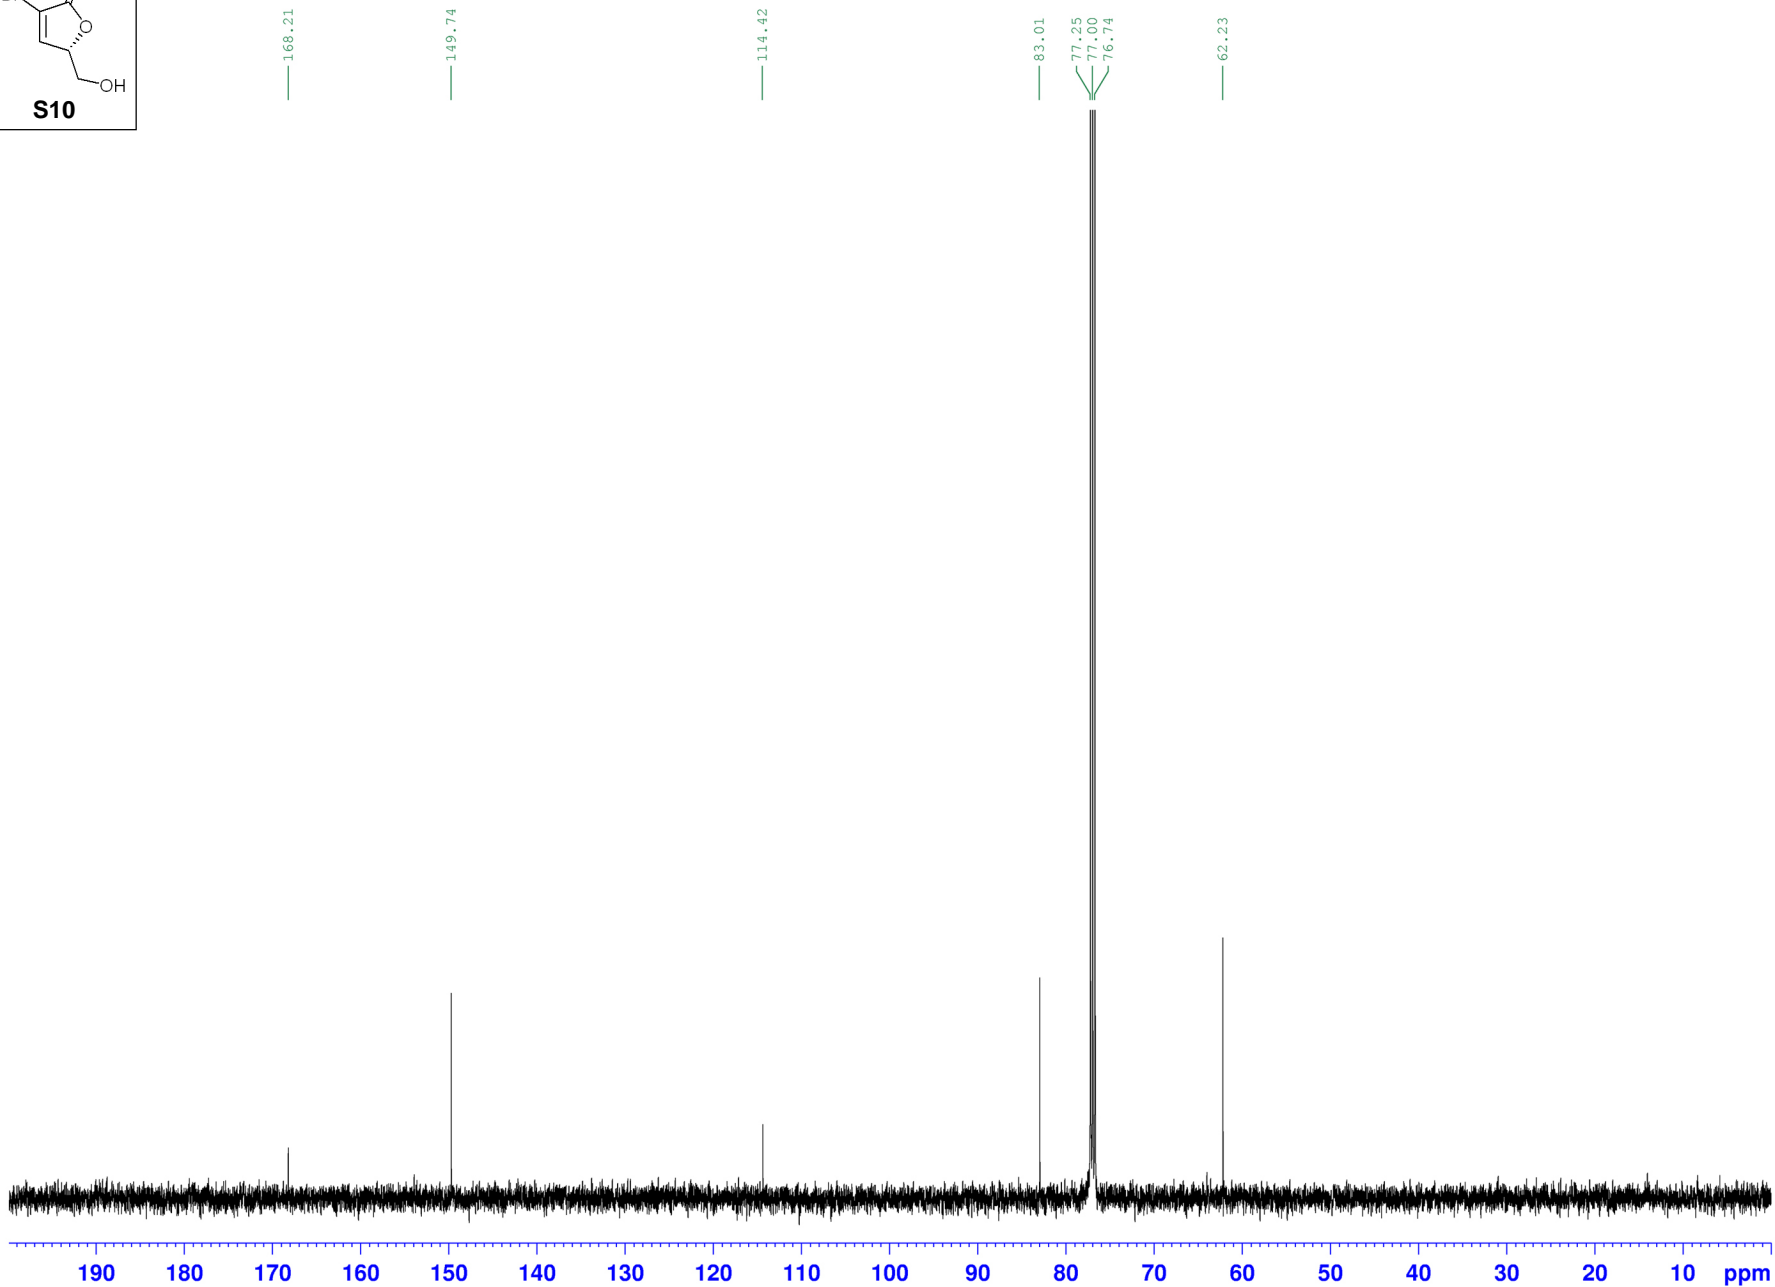

NAME May23-2008  
EXPNO 21  
PROCNO 1  
Date\_ 20080523  
Time 15.35  
INSTRUM drx500  
PROBHD 5 mm Multinu  
PULPROG zgpg30  
TD 65536  
SOLVENT CDCl3  
NS 256  
DS 4  
SWH 31446.541 Hz  
FIDRES 0.479836 Hz  
AQ 1.0420883 sec  
RG 5160.6  
DW 15.900 use  
DE 6.00 use  
TE 300.0 K  
D1 2.00000000 sec  
d11 0.03000000 sec  
d12 0.00002000 sec

===== CHANNEL f1 ===  
NUC1 13C  
P1 5.50 use  
PL1 0.00 dB  
SF01 125.7715719 MHz

===== CHANNEL f2 ===  
CPDPRG2 waltz16  
NUC2 1H  
PCPD2 95.00 use  
PL2 0.00 dB  
PL12 19.00 dB  
PL13 19.00 dB  
SF02 500.1320005 MHz  
SI 32768  
SF 125.7577922 MHz  
WDW EM  
SSB 0  
LB 1.00 Hz  
GB 0  
PC 1.40

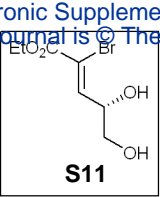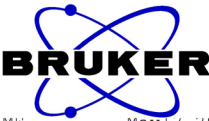

NAME May17-2008  
EXPNO 20  
PROCNO 1  
Date\_ 20080517  
Time 20.08  
INSTRUM drx500  
PROBHD 5 mm Multinu  
PULPROG zg30  
TD 82642  
SOLVENT CDC13  
NS 16  
DS 2  
SWH 10330.578 Hz  
FIDRES 0.125004 Hz  
AQ 3.9999712 sec  
RG 512  
DW 48.400 use  
DE 6.00 use  
TE 300.0 K  
D1 1.00000000 sec

===== CHANNEL f1 ===  
NUC1 1H  
P1 15.50 use  
PL1 0.00 dB  
SFO1 500.1330885 MHz  
SI 65536  
SF 500.1300088 MHz  
WDW EM  
SSB 0  
LB 0.30 Hz  
GB 0  
PC 1.00

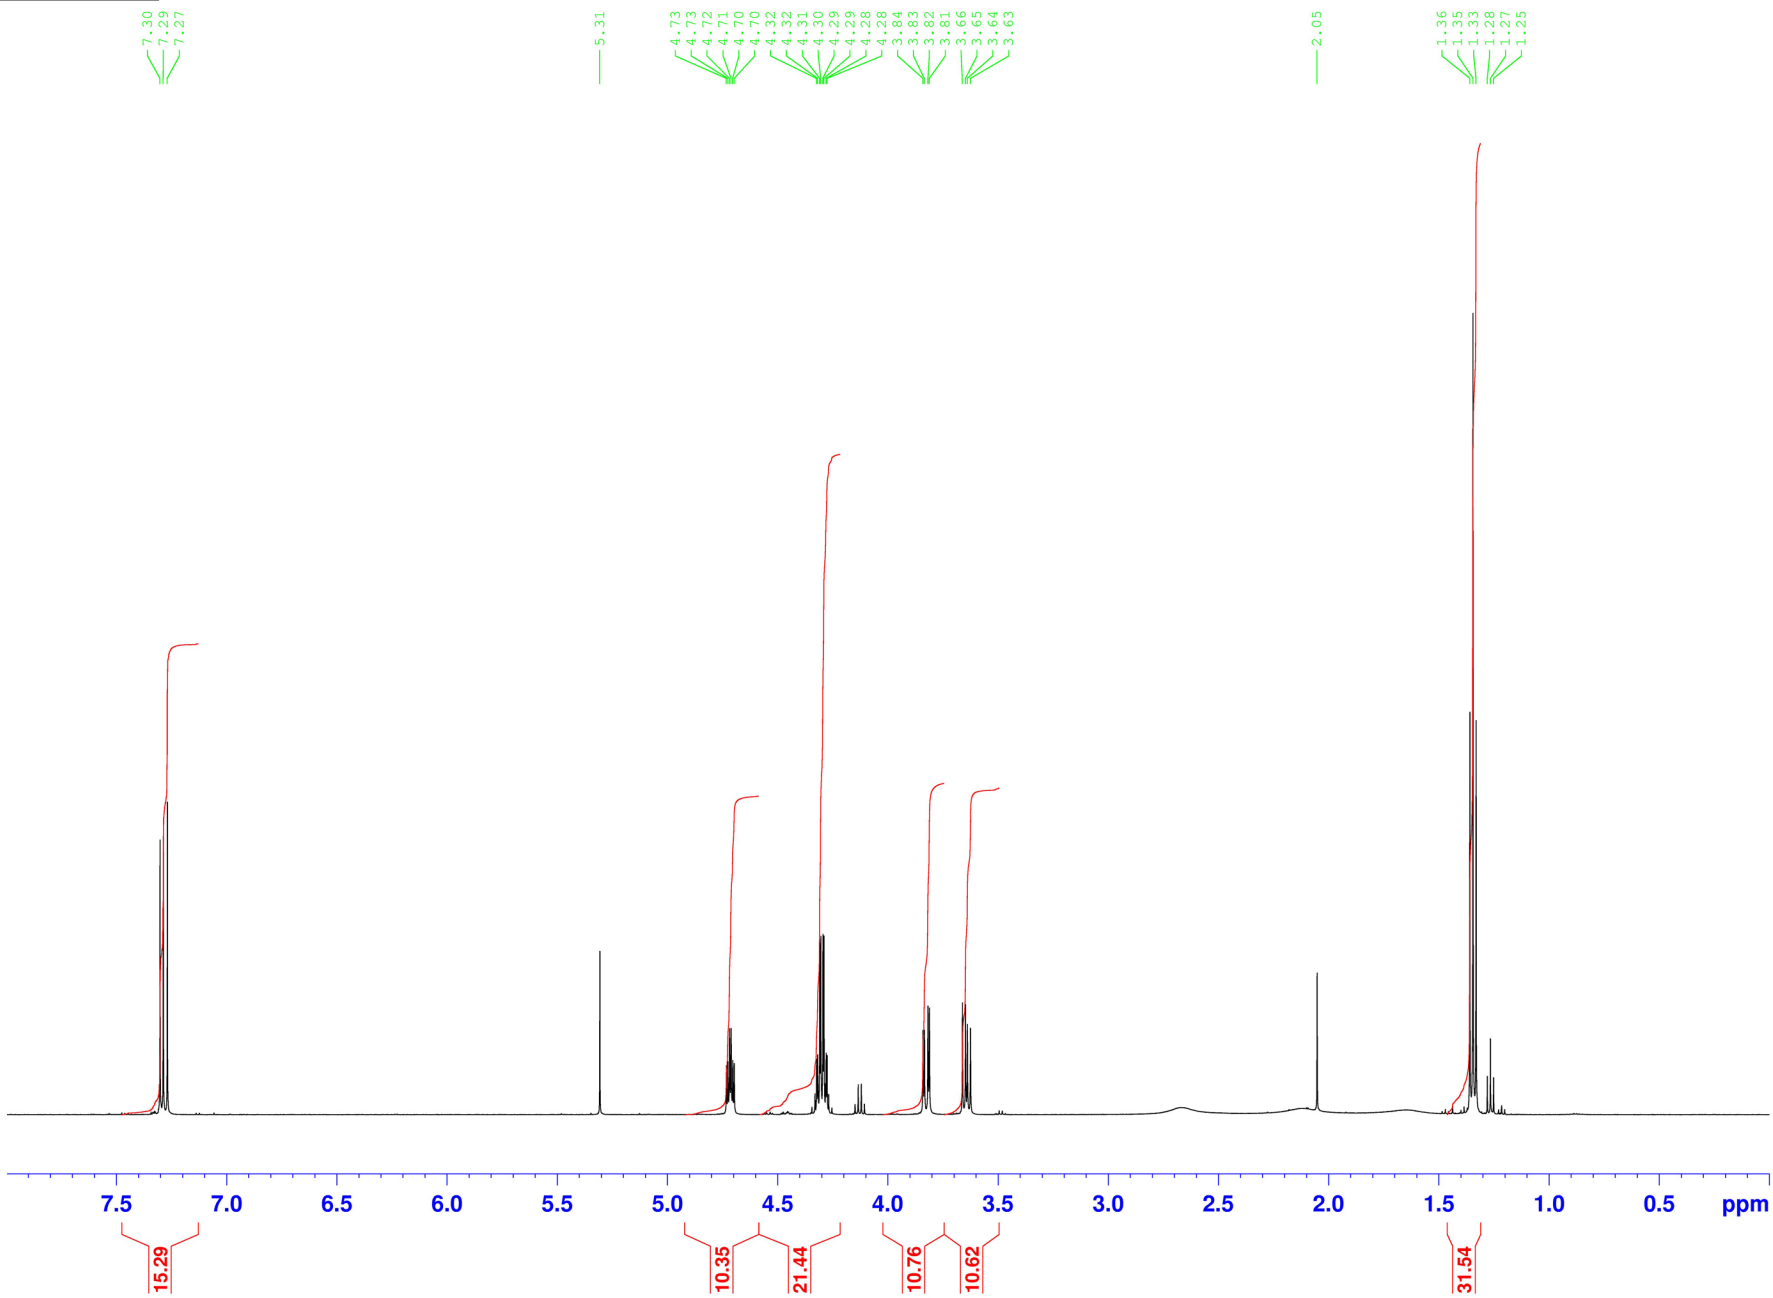

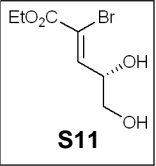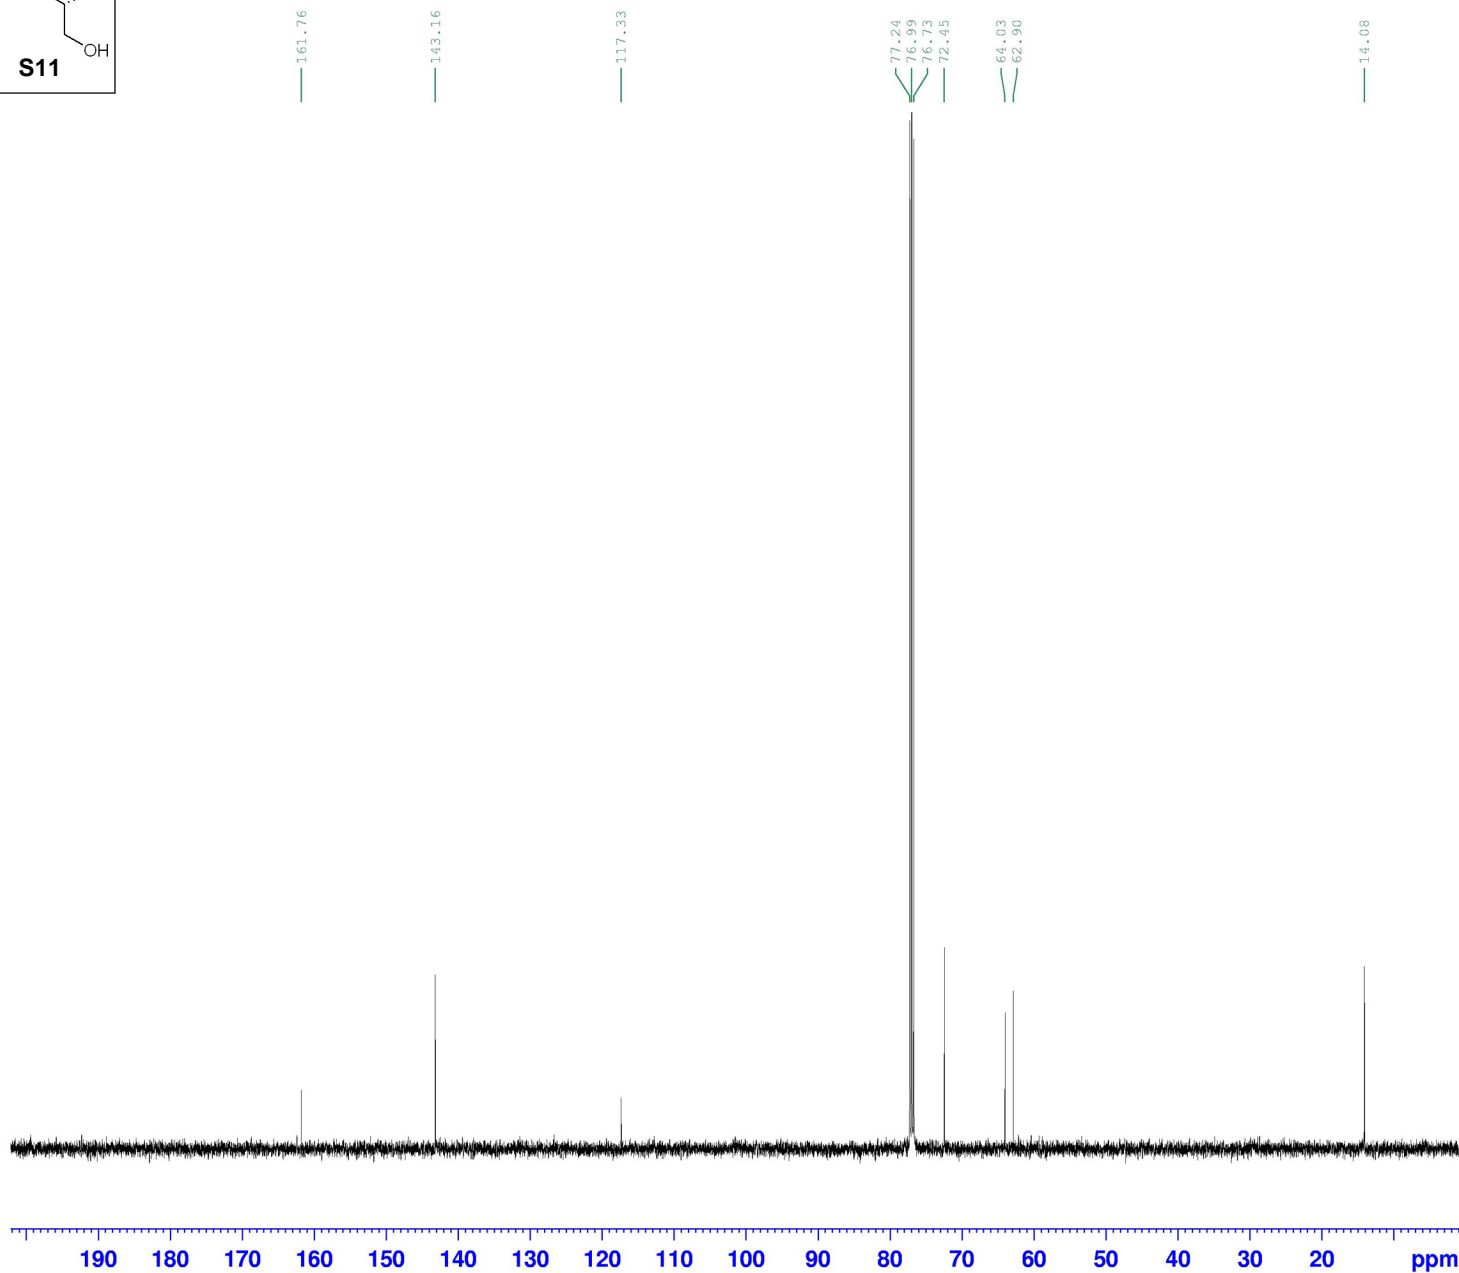

NAME May20-2008  
EXPNO 82  
PROCNO 1  
Date\_ 20080520  
Time 18.59  
INSTRUM drx500  
PROBHD 5 mm Multinu  
PULPROG zgpg30  
TD 65536  
SOLVENT CDCl3  
NS 256  
DS 4  
SWH 31446.541 Hz  
FIDRES 0.479836 Hz  
AQ 1.0420883 sec  
RG 3649.1  
DW 15.900 usec  
DE 6.00 usec  
TE 300.0 K  
D1 2.00000000 sec  
d11 0.03000000 sec  
d12 0.00002000 sec

===== CHANNEL f1 =====  
NUC1 13C  
P1 5.50 usec  
PL1 0.00 dB  
SFO1 125.7715719 MHz

===== CHANNEL f2 =====  
CPDPRG2 waltz16  
NUC2 1H  
PCPD2 95.00 usec  
PL2 0.00 dB  
PL12 19.00 dB  
PL13 19.00 dB  
SFO2 500.1320005 MHz  
SI 32768  
SF 125.7577938 MHz  
WDW EM  
SSB 0  
LB 1.00 Hz  
GB 0  
PC 1.40

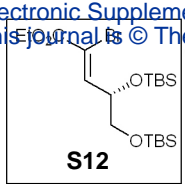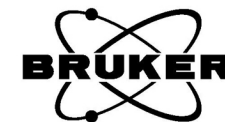

NAME ae113  
EXPNO 1  
PROCNO 1  
Date\_ 20090416  
Time 17.33  
INSTRUM av400  
PROBHD 5 mm QNP 1H/15  
PULPROG zg30  
TD 65536  
SOLVENT CDC13  
NS 7  
DS 0  
SWH 8223.685 Hz  
FIDRES 0.125483 Hz  
AQ 3.9846387 sec  
RG 406  
DW 60.800 use  
DE 16.52 use  
TE 294.0 K  
D1 1.00000000 sec  
TD0 1

===== CHANNEL f1 =====  
NUC1 1H  
P1 11.70 use  
PL1 0.00 dB  
PL1W 13.81537533 W  
SFO1 400.1324710 MHz  
SI 131072  
SF 400.1300000 MHz  
WDW no  
SSB 0  
LB 0.00 Hz  
GB 0  
PC 1.40

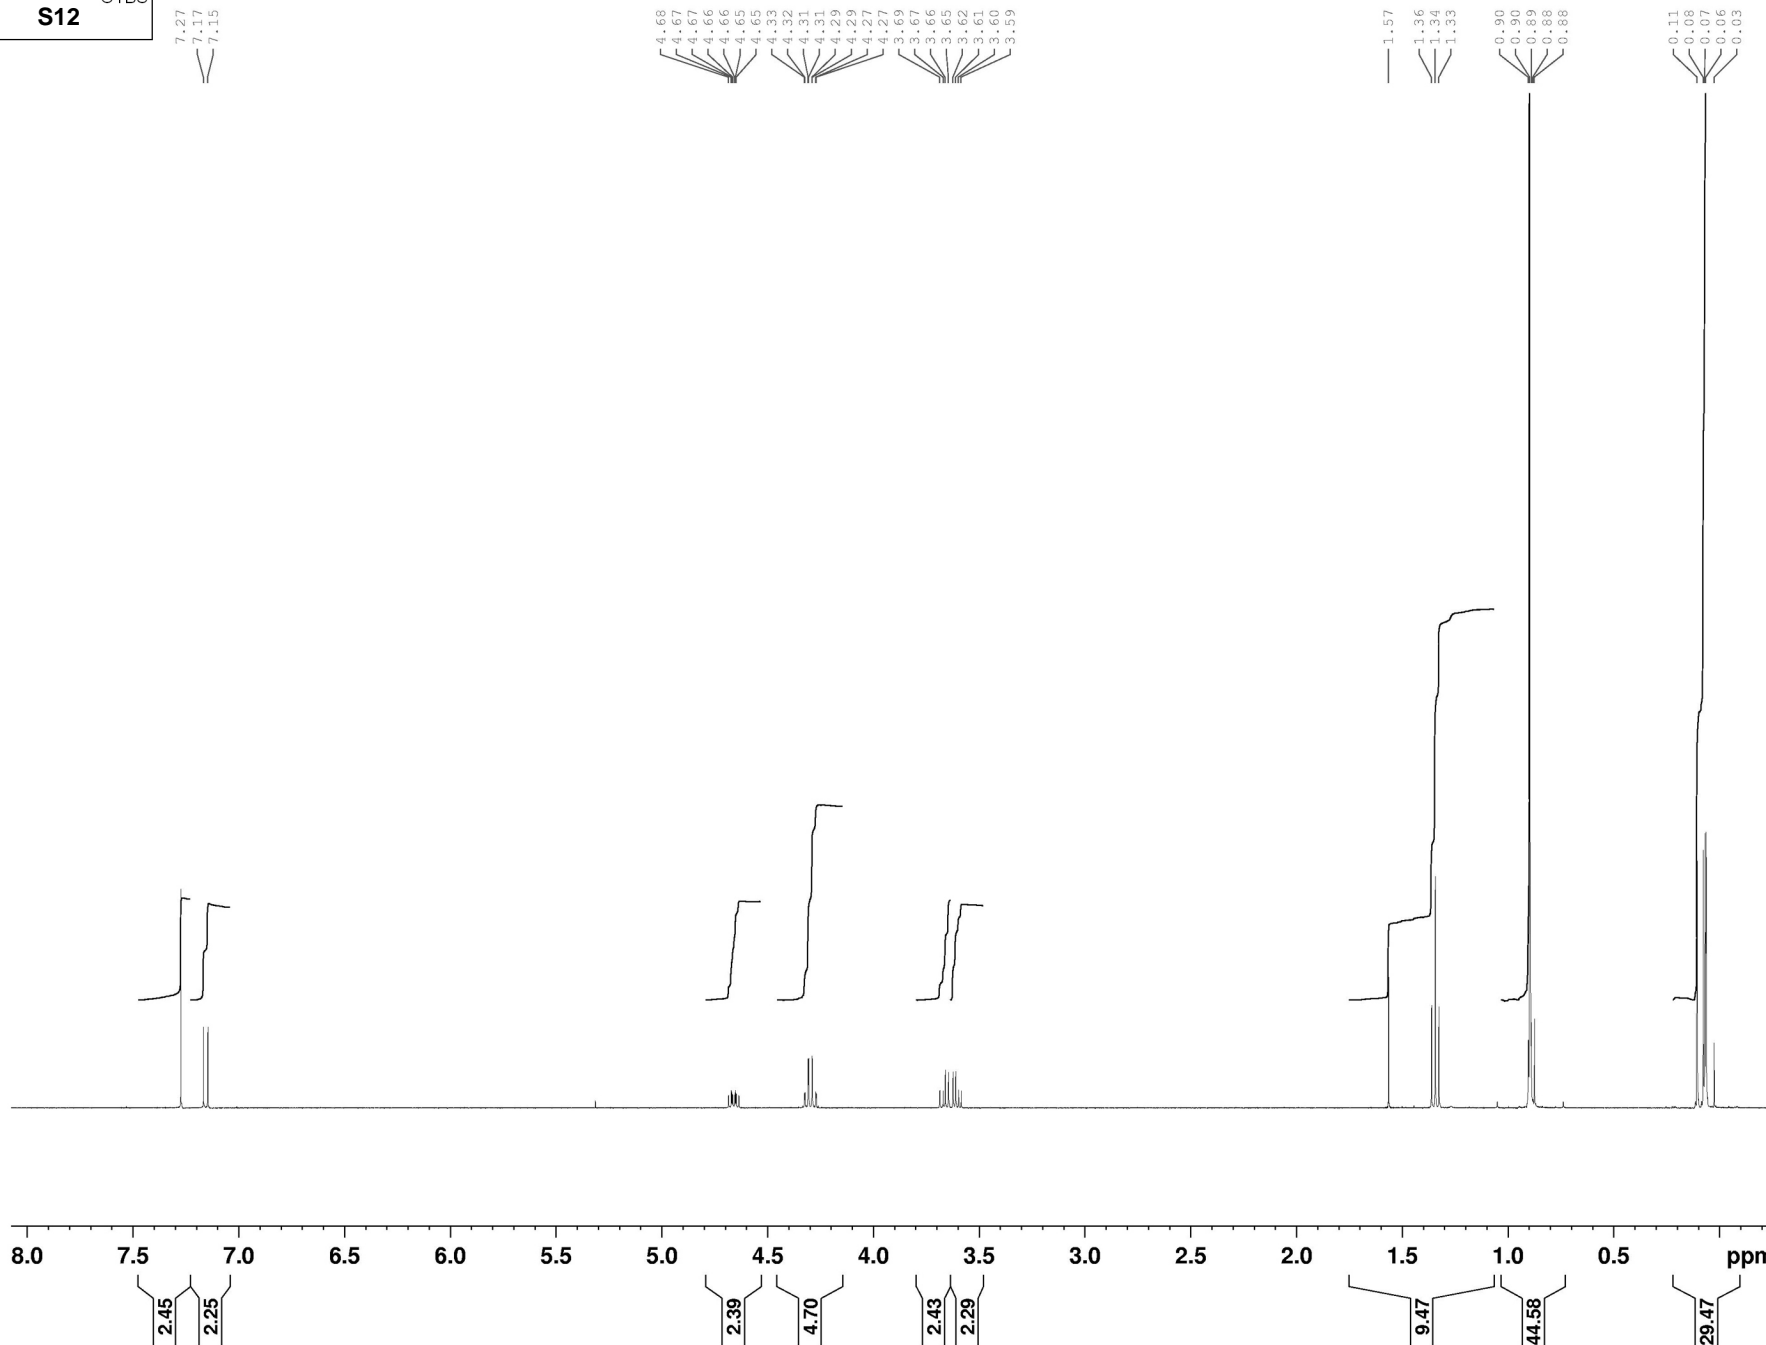

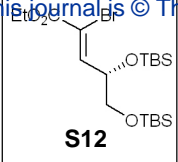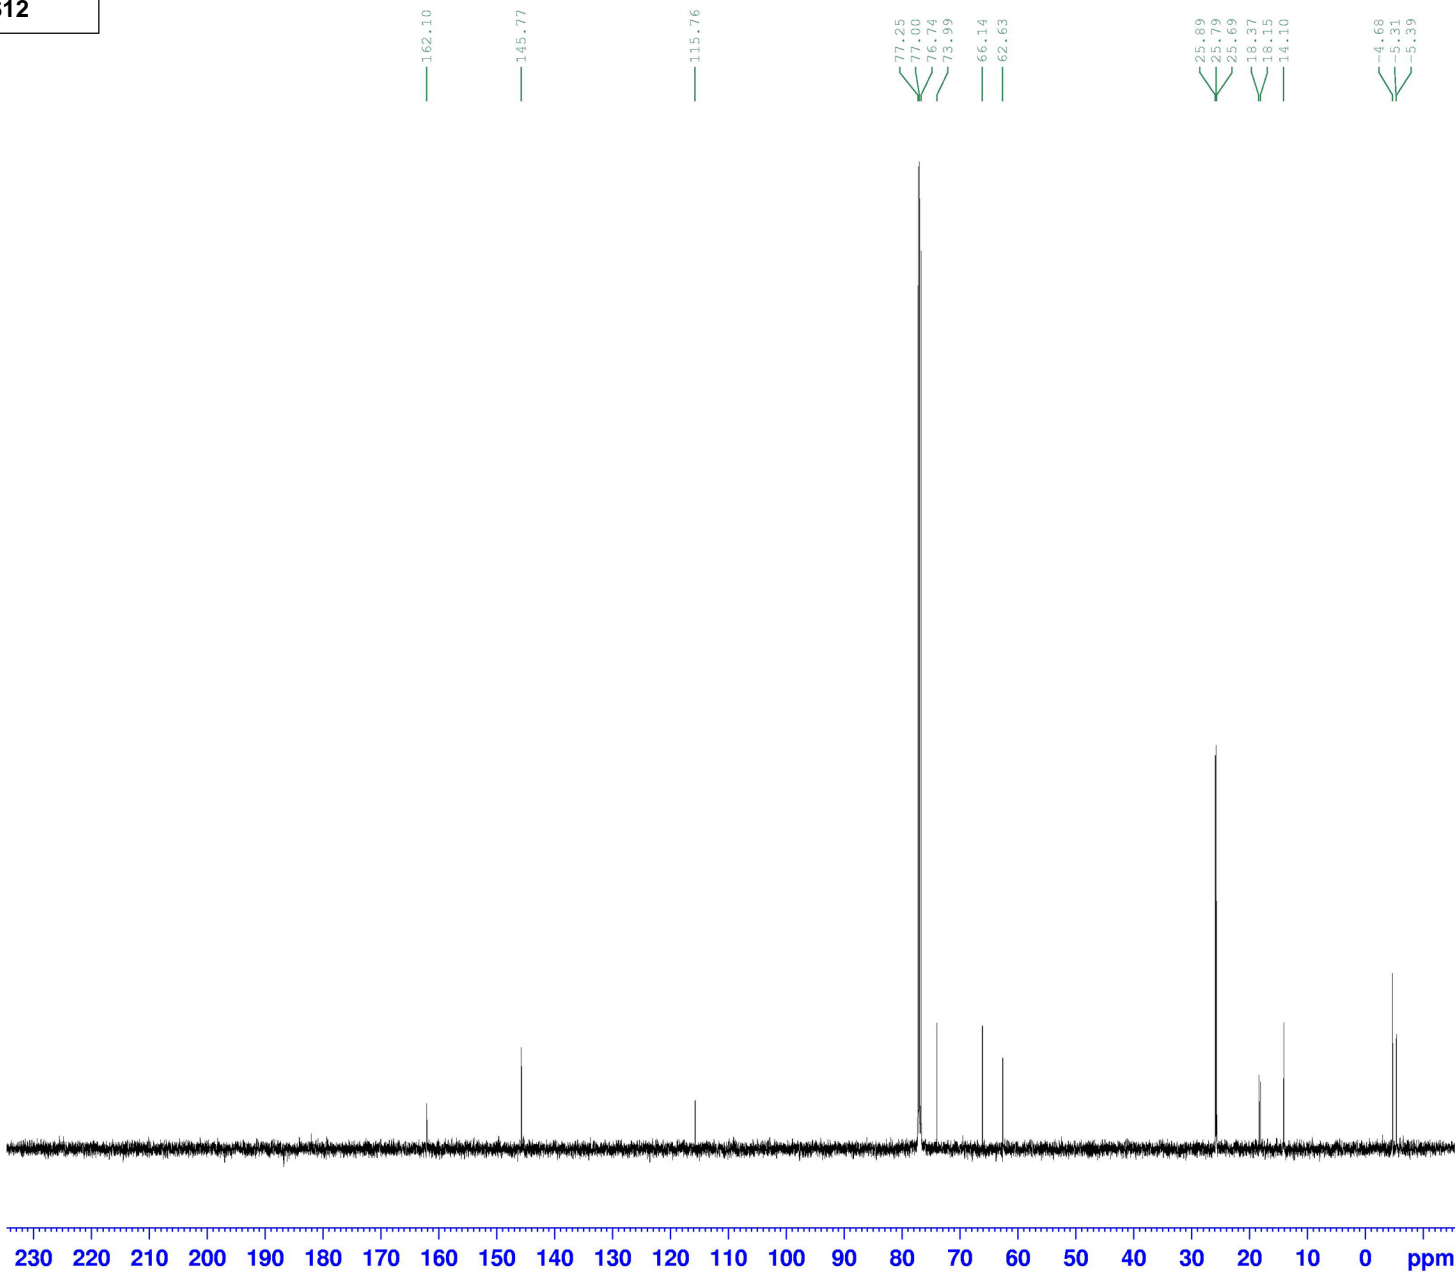

NAME May23-2008  
EXPNO 41  
PROCNO 1  
Date\_ 20080523  
Time 16.28  
INSTRUM drx500  
PROBHD 5 mm Multinu  
PULPROG zgpg30  
TD 65536  
SOLVENT CDC13  
NS 256  
DS 4  
SWH 31446.541 Hz  
FIDRES 0.479836 Hz  
AQ 1.0420883 sec  
RG 5792.6  
DW 15.900 usec  
DE 6.00 usec  
TE 300.0 K  
D1 2.00000000 sec  
d11 0.03000000 sec  
d12 0.00002000 sec

===== CHANNEL f1 =====  
NUC1 13C  
P1 5.50 usec  
PL1 0.00 dB  
SFO1 125.7715719 MHz

===== CHANNEL f2 =====  
CPDPRG2 waltz16  
NUC2 1H  
PCPD2 95.00 usec  
PL2 0.00 dB  
PL12 19.00 dB  
PL13 19.00 dB  
SFO2 500.1320005 MHz  
SI 32768  
SF 125.7577912 MHz  
WDW EM  
SSB 0  
LB 1.00 Hz  
GB 0  
PC 1.40

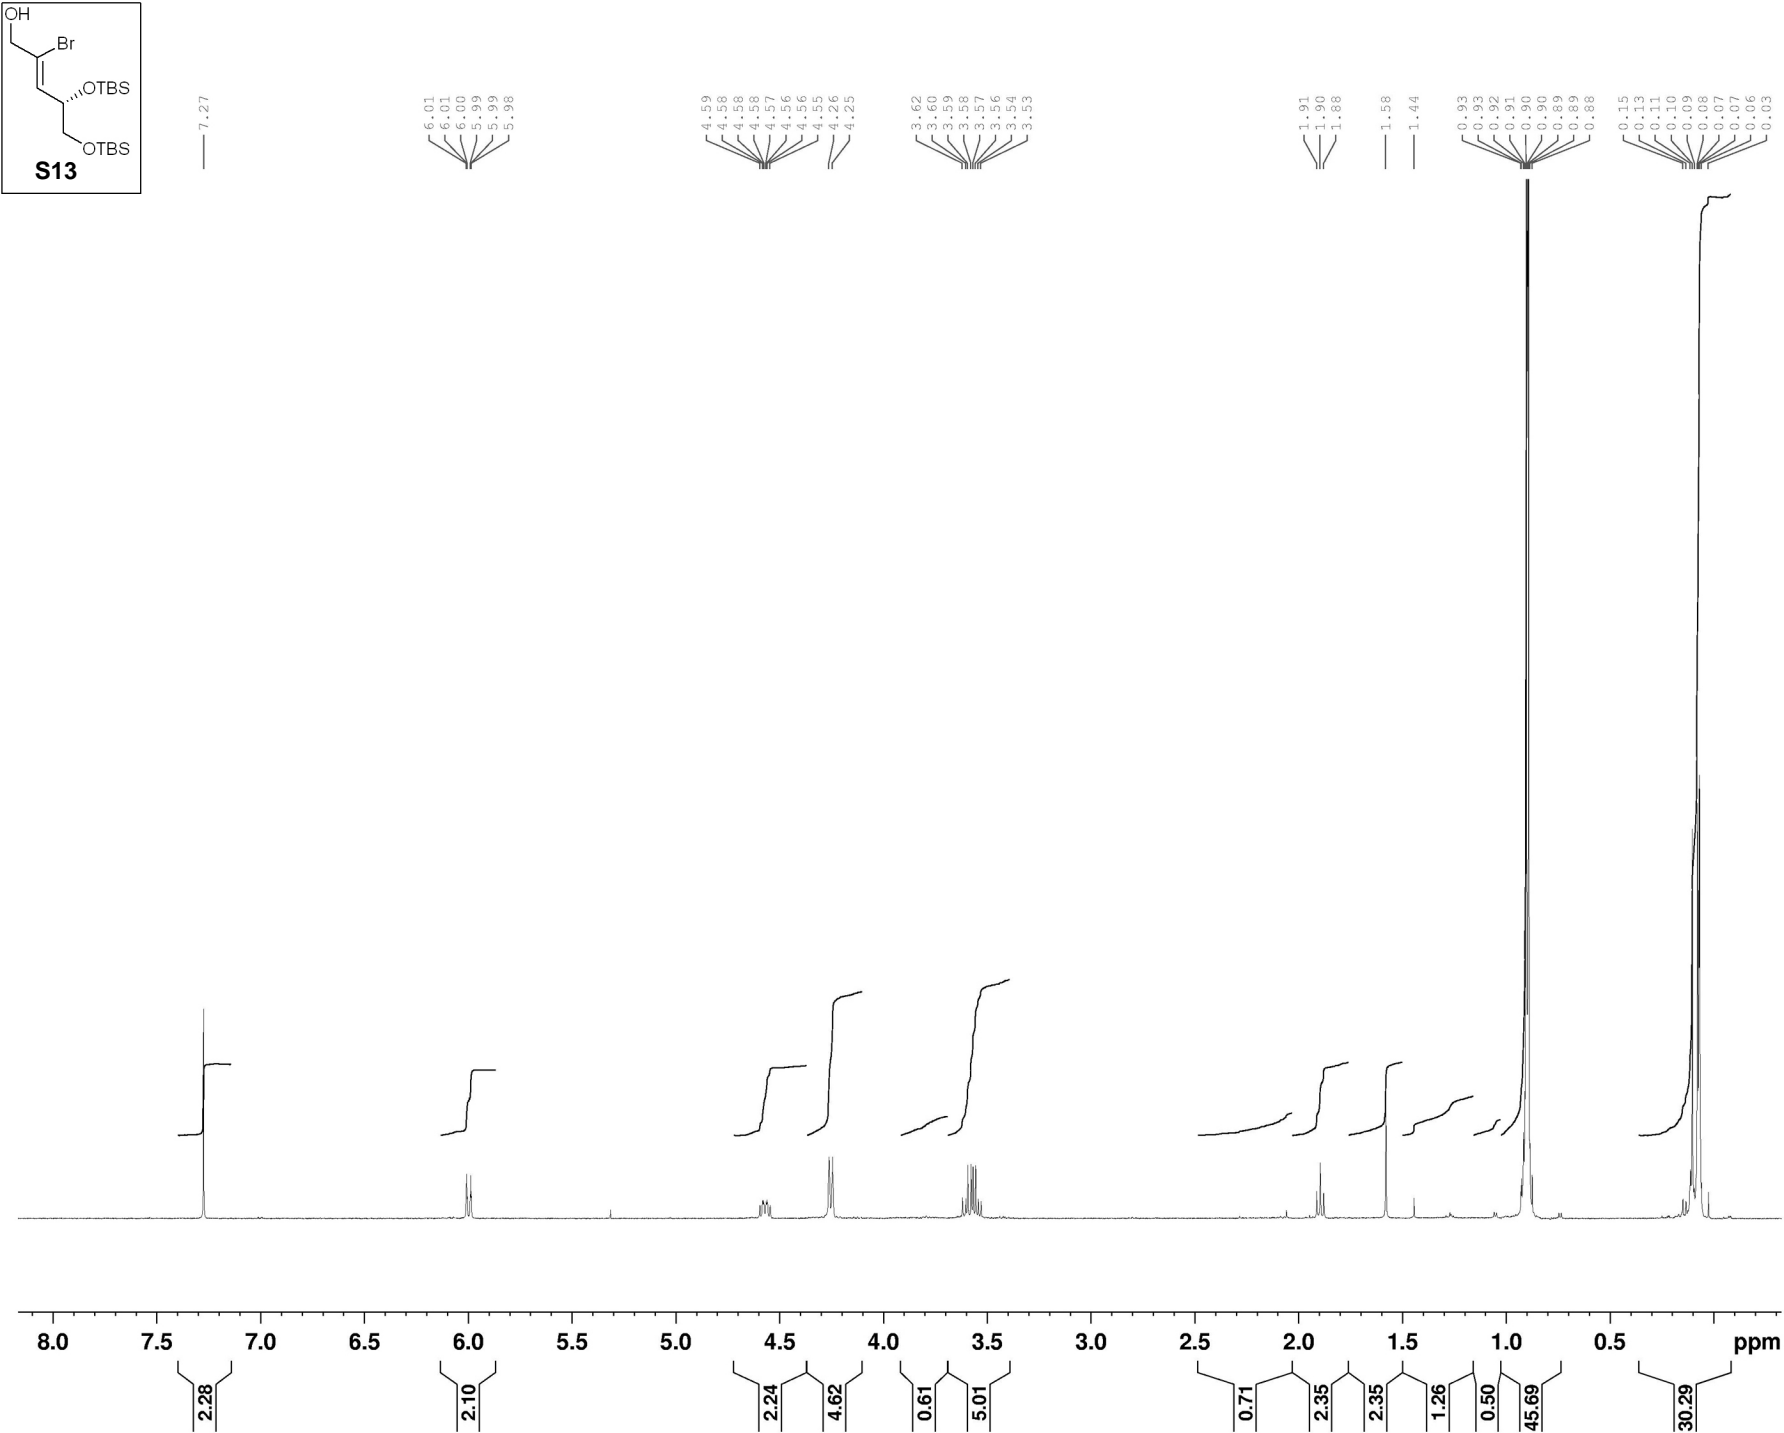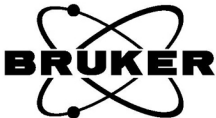

NAME ae115  
EXPNO 1  
PROCNO 1  
Date\_ 20090416  
Time 17.29  
INSTRUM av400  
PROBHD 5 mm QNP 1H/15  
PULPROG zg30  
TD 65536  
SOLVENT CDC13  
NS 15  
DS 0  
SWH 8223.685 Hz  
FIDRES 0.125483 Hz  
AQ 3.9846387 sec  
RG 456  
DW 60.800 use  
DE 16.52 use  
TE 294.0 K  
D1 1.00000000 sec  
TD0 1

===== CHANNEL f1 =====  
NUC1 1H  
P1 11.70 use  
PL1 0.00 dB  
PL1W 13.81537533 W  
SFO1 400.1324710 MHz  
SI 32768  
SF 400.1300000 MHz  
WDW EM  
SSB 0  
LB 0.30 Hz  
GB 0  
PC 1.40

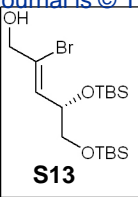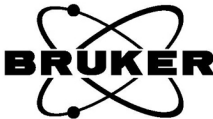

NAME ae114  
EXPNO 1  
PROCNO 1  
Date\_ 20080530  
Time 17.23  
INSTRUM av400  
PROBHD 5 mm QNP 1H/15  
PULPROG zgpg30  
TD 65536  
SOLVENT CDCl3  
NS 161  
DS 0  
SWH 24038.461 Hz  
FIDRES 0.366798 Hz  
AQ 1.3631988 sec  
RG 2050  
DW 20.800 use  
DE 9.78 use  
TE 293.2 K  
D1 2.00000000 sec  
D11 0.03000000 sec  
TD0 1

===== CHANNEL f1 =====  
NUC1 13C  
P1 9.00 use  
PL1 -2.00 dB  
PL1W 65.28957367 W  
SFO1 100.6228298 MHz

===== CHANNEL f2 =====  
CPDPRG2 waltz16  
NUC2 1H  
PCPD2 90.00 use  
PL2 0.00 dB  
PL12 17.72 dB  
PL13 18.00 dB  
PL2W 13.81537533 W  
PL12W 0.23354080 W  
PL13W 0.21895894 W  
SFO2 400.1316005 MHz  
SI 32768  
SF 100.6127708 MHz  
WDW EM  
SSB 0  
LB 1.00 Hz  
GB 0  
PC 1.40

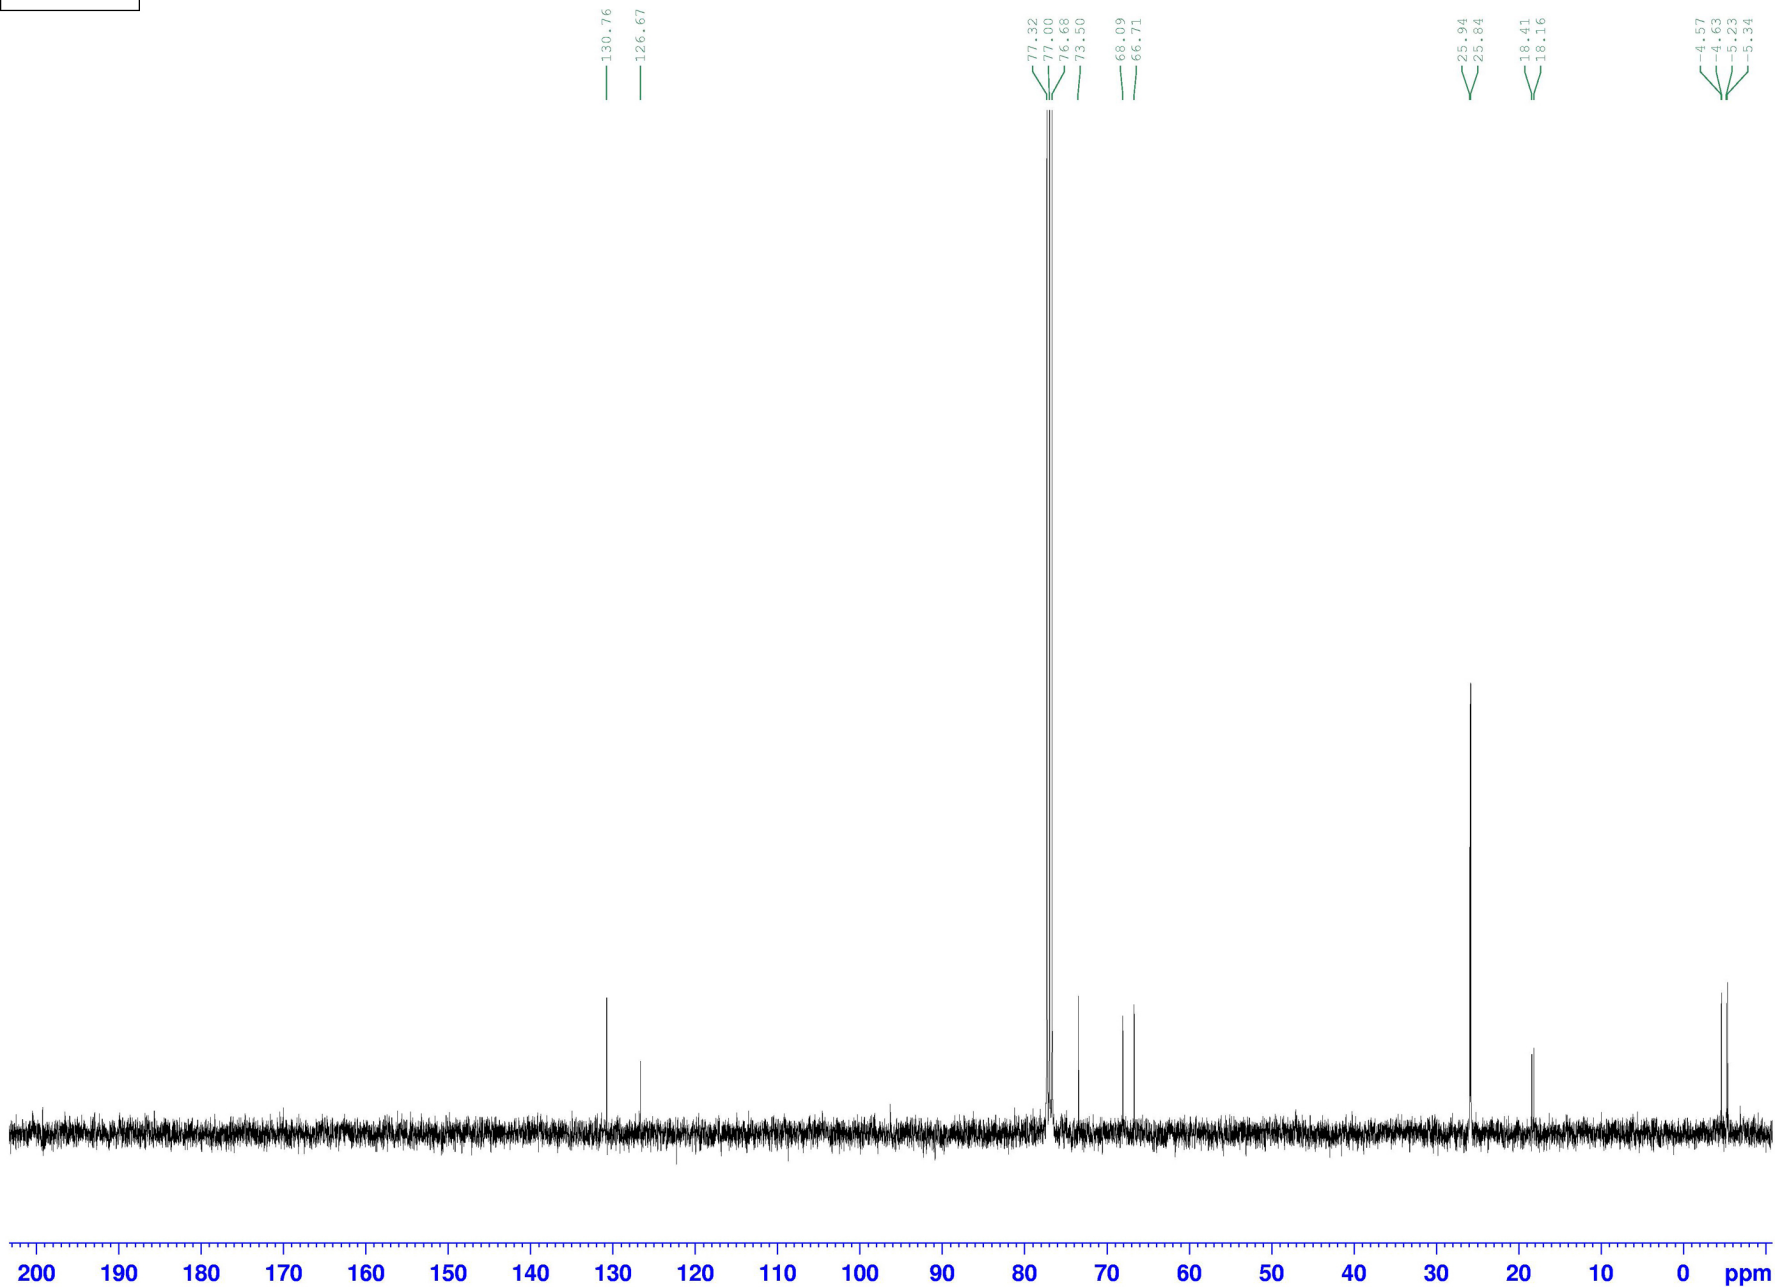

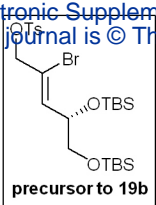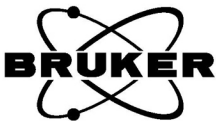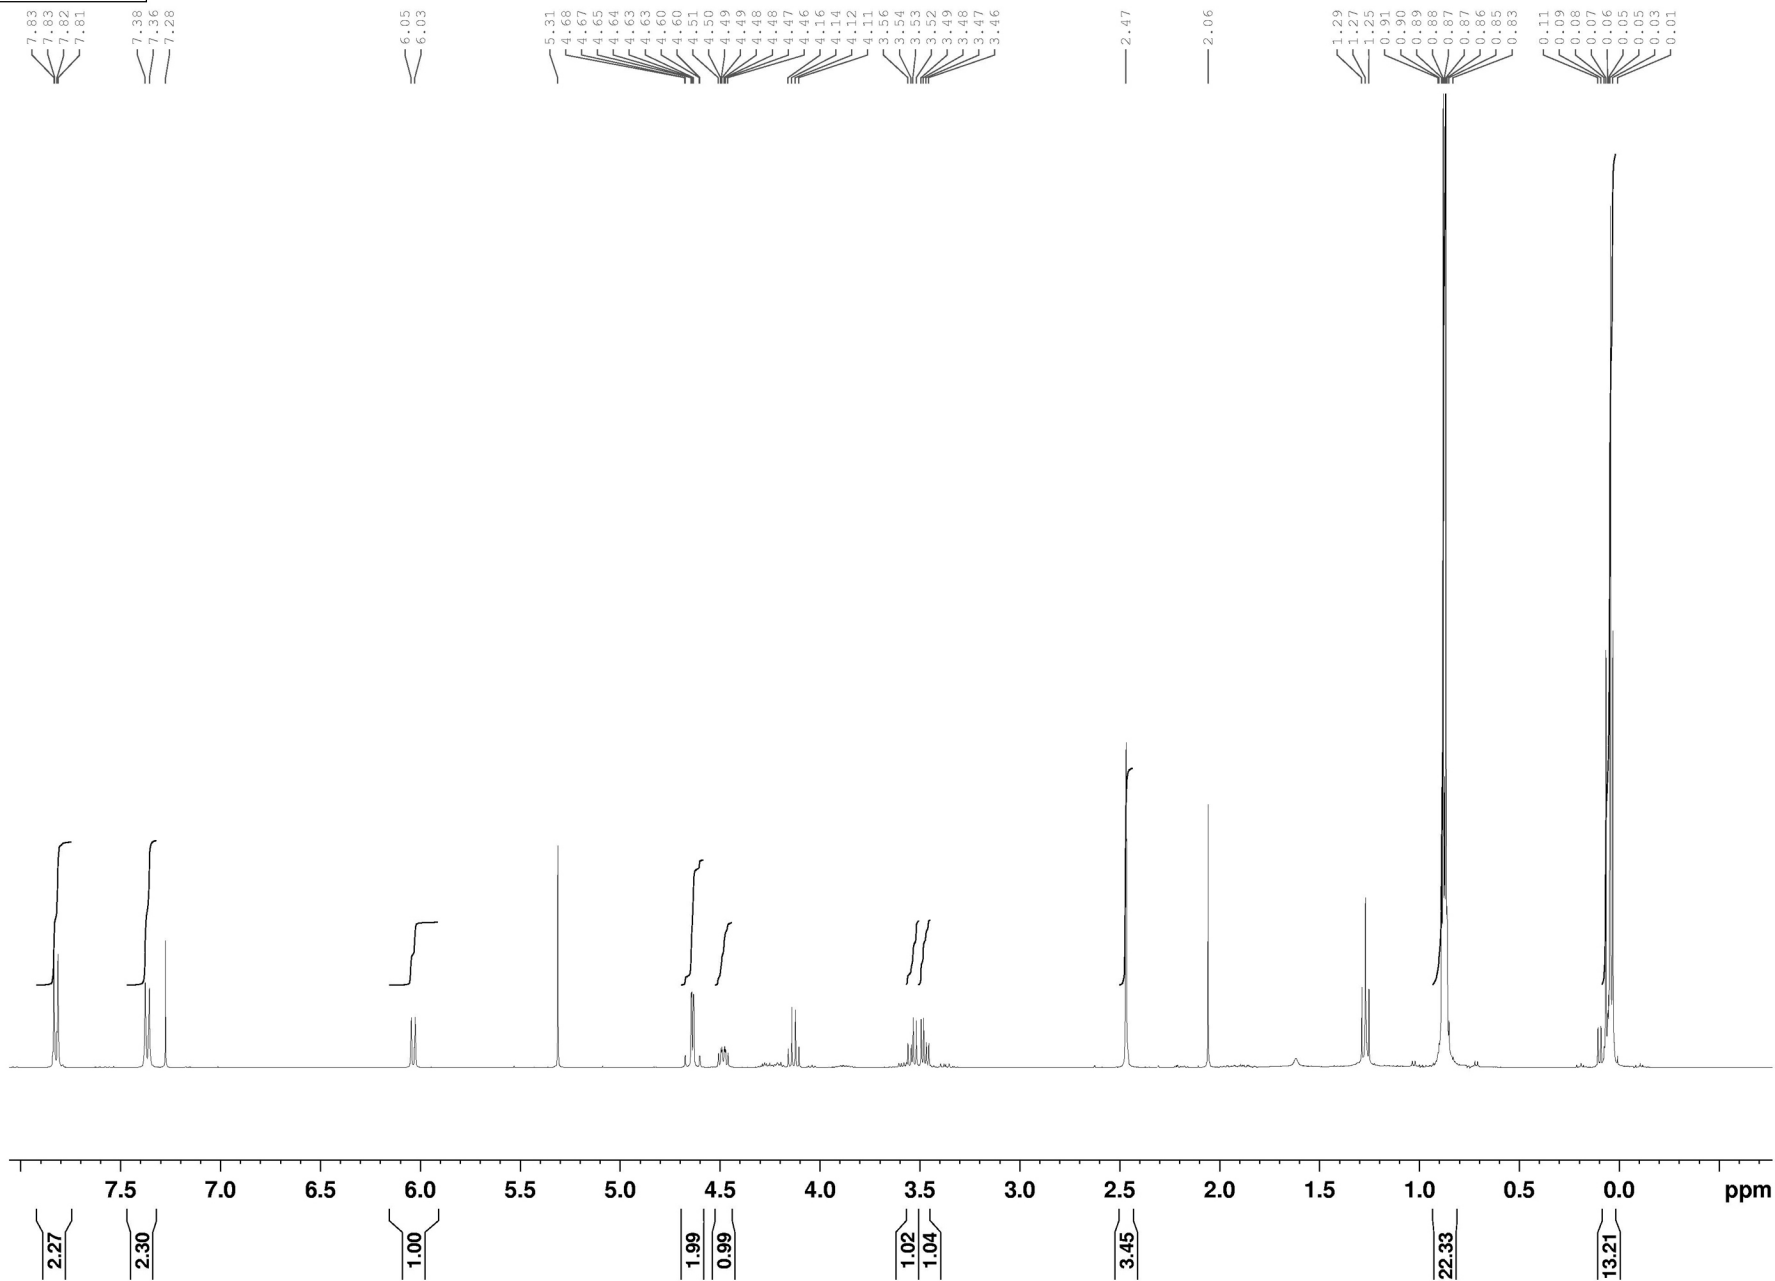

NAME ae120  
EXPNO 2  
PROCNO 1  
Date\_ 20080528  
Time 15.44  
INSTRUM av400  
PROBHD 5 mm QNP 1H/15  
PULPROG zg30  
TD 65536  
SOLVENT CDCl3  
NS 16  
DS 0  
SWH 8223.685 Hz  
FIDRES 0.125483 Hz  
AQ 3.9846387 sec  
RG 128  
DW 60.800 use  
DE 16.52 use  
TE 293.2 K  
D1 1.00000000 sec  
TD0 1

===== CHANNEL f1 =====  
NUC1 1H  
P1 11.70 use  
PL1 0.00 dB  
PL1W 13.81537533 W  
SFO1 400.1324710 MHz  
SI 32768  
SF 400.1300000 MHz  
WDW EM  
SSB 0  
LB 0.30 Hz  
GB 0  
PC 1.40

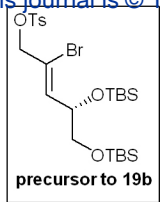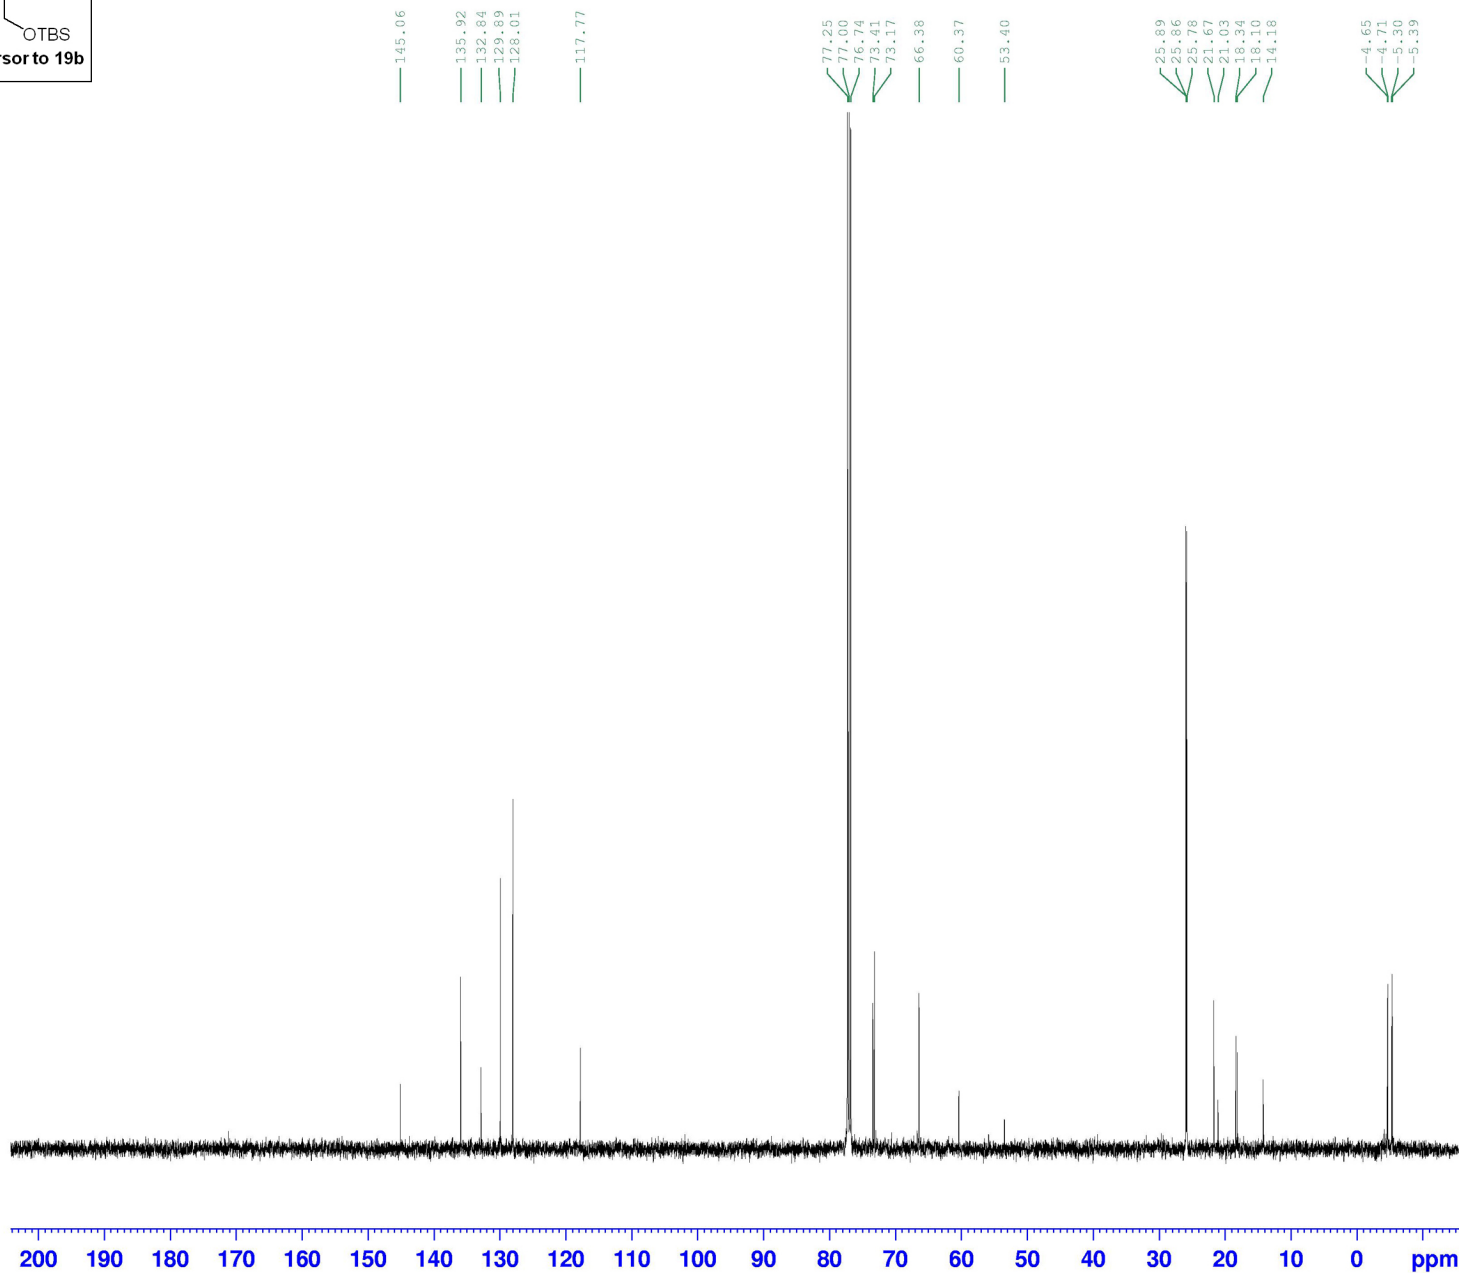

NAME May28-2008  
EXPNO 13  
PROCNO 1  
Date\_ 20080528  
Time 17.42  
INSTRUM drx500  
PROBHD 5 mm Multinu  
PULPROG zgpg30  
TD 65536  
SOLVENT CDC13  
NS 256  
DS 4  
SWH 31446.541 Hz  
FIDRES 0.479836 Hz  
AQ 1.0420883 sec  
RG 8192  
DW 15.900 usec  
DE 6.00 usec  
TE 300.0 K  
D1 2.00000000 sec  
d11 0.03000000 sec  
d12 0.00002000 sec

===== CHANNEL f1 =====  
NUC1 13C  
P1 5.50 usec  
PL1 0.00 dB  
SFO1 125.7715719 MHz

===== CHANNEL f2 =====  
CPDPRG2 waltz16  
NUC2 1H  
PCPD2 95.00 usec  
PL2 0.00 dB  
PL12 19.00 dB  
PL13 19.00 dB  
SFO2 500.1320005 MHz  
SI 32768  
SF 125.7577922 MHz  
WDW EM  
SSB 0  
LB 1.00 Hz  
GB 0  
PC 1.40

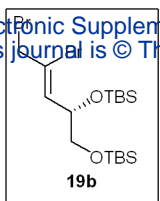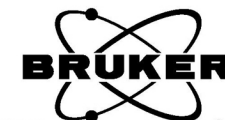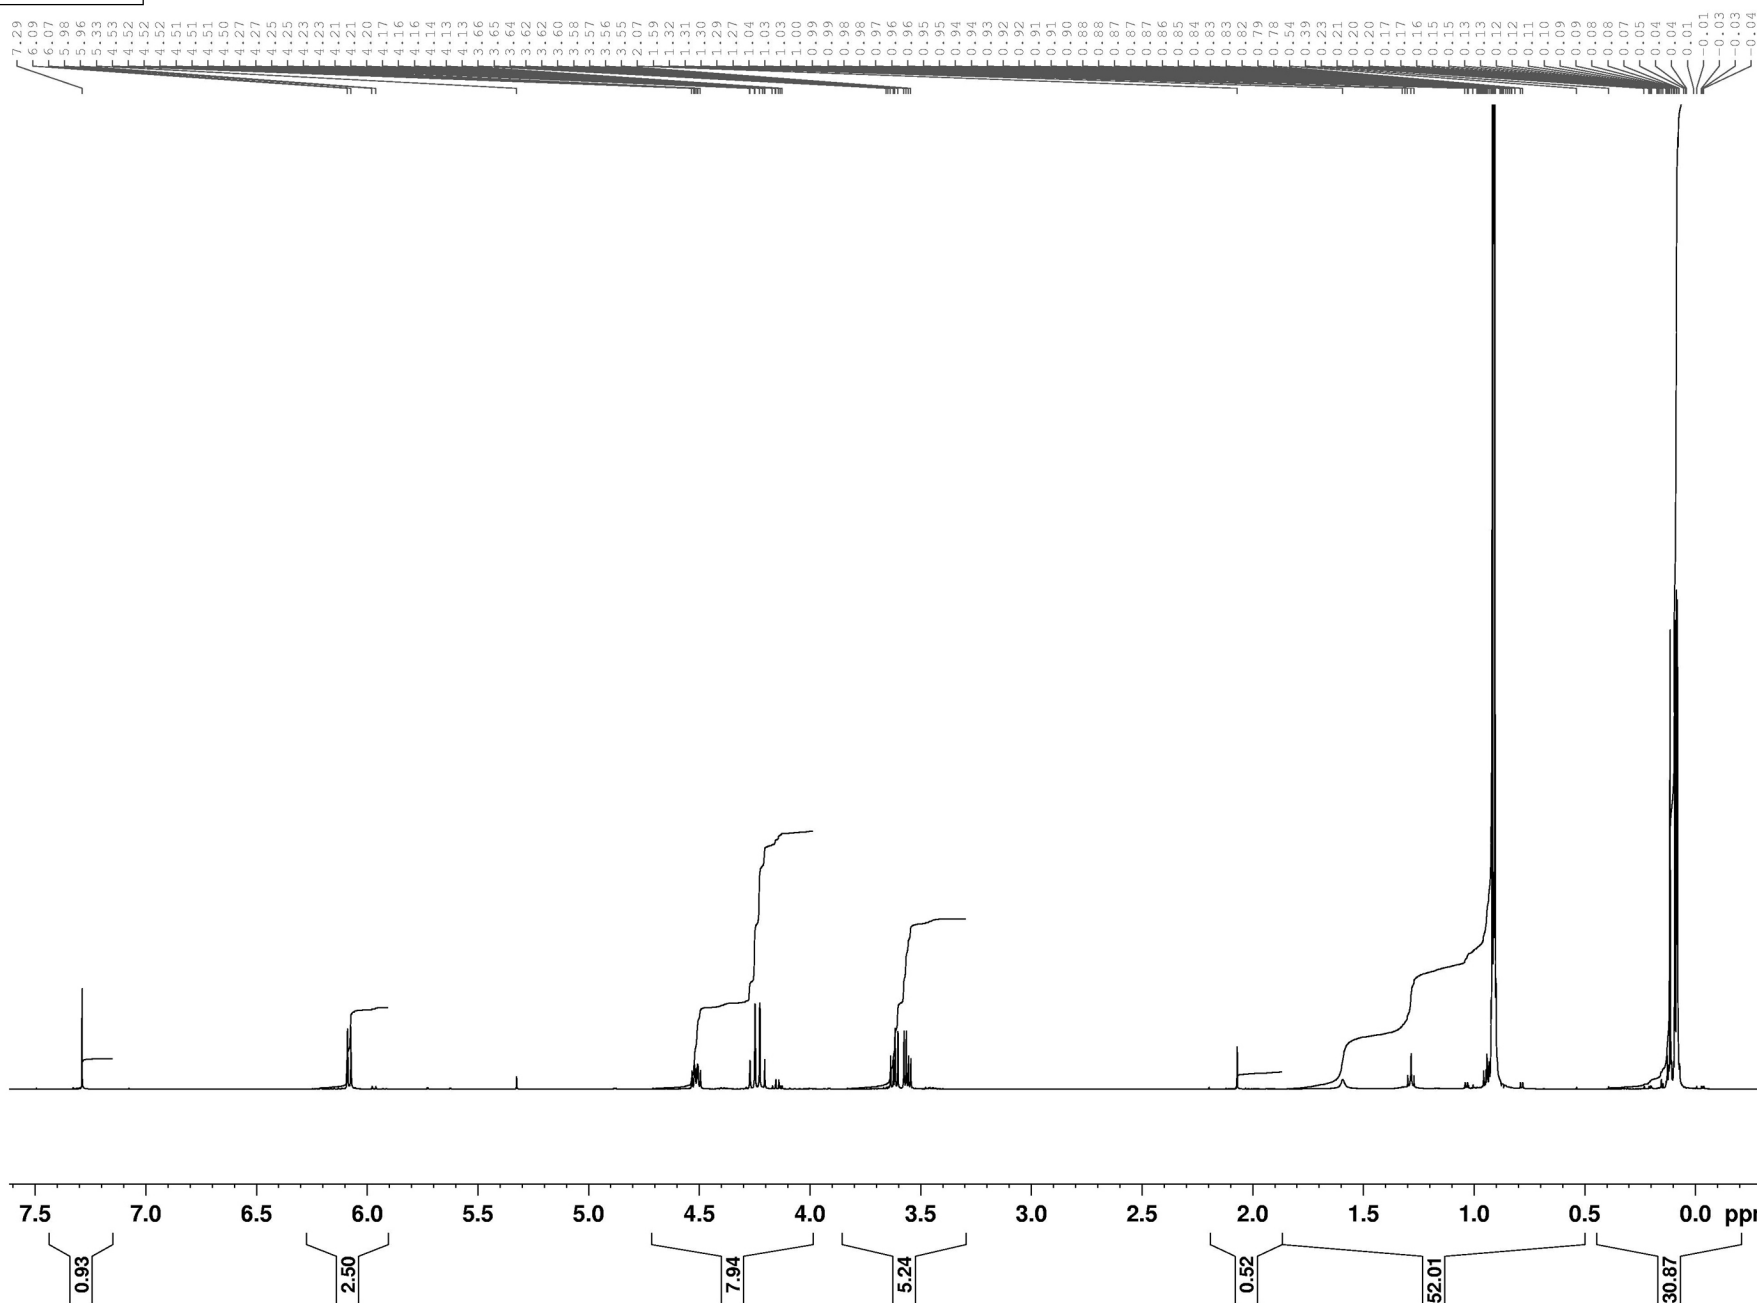

NAME May29-2008  
EXPNO 11  
PROCNO 1  
Date\_ 20080530  
Time 6.53  
INSTRUM drx500  
PROBHD 5 mm Multinu  
PULPROG zg30  
TD 82642  
SOLVENT CDCl3  
NS 16  
DS 2  
SWH 10330.578 Hz  
FIDRES 0.125004 Hz  
AQ 3.9999712 sec  
RG 181  
DW 48.400 use  
DE 6.00 use  
TE 300.0 K  
D1 1.00000000 sec

===== CHANNEL f1 =====  
NUC1 1H  
P1 15.50 use  
PL1 0.00 dB  
SF01 500.1330885 MHz  
SI 65536  
SF 500.1300000 MHz  
WDW EM  
SSB 0  
LB 0.30 Hz  
GB 0  
PC 1.00

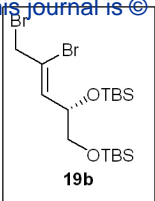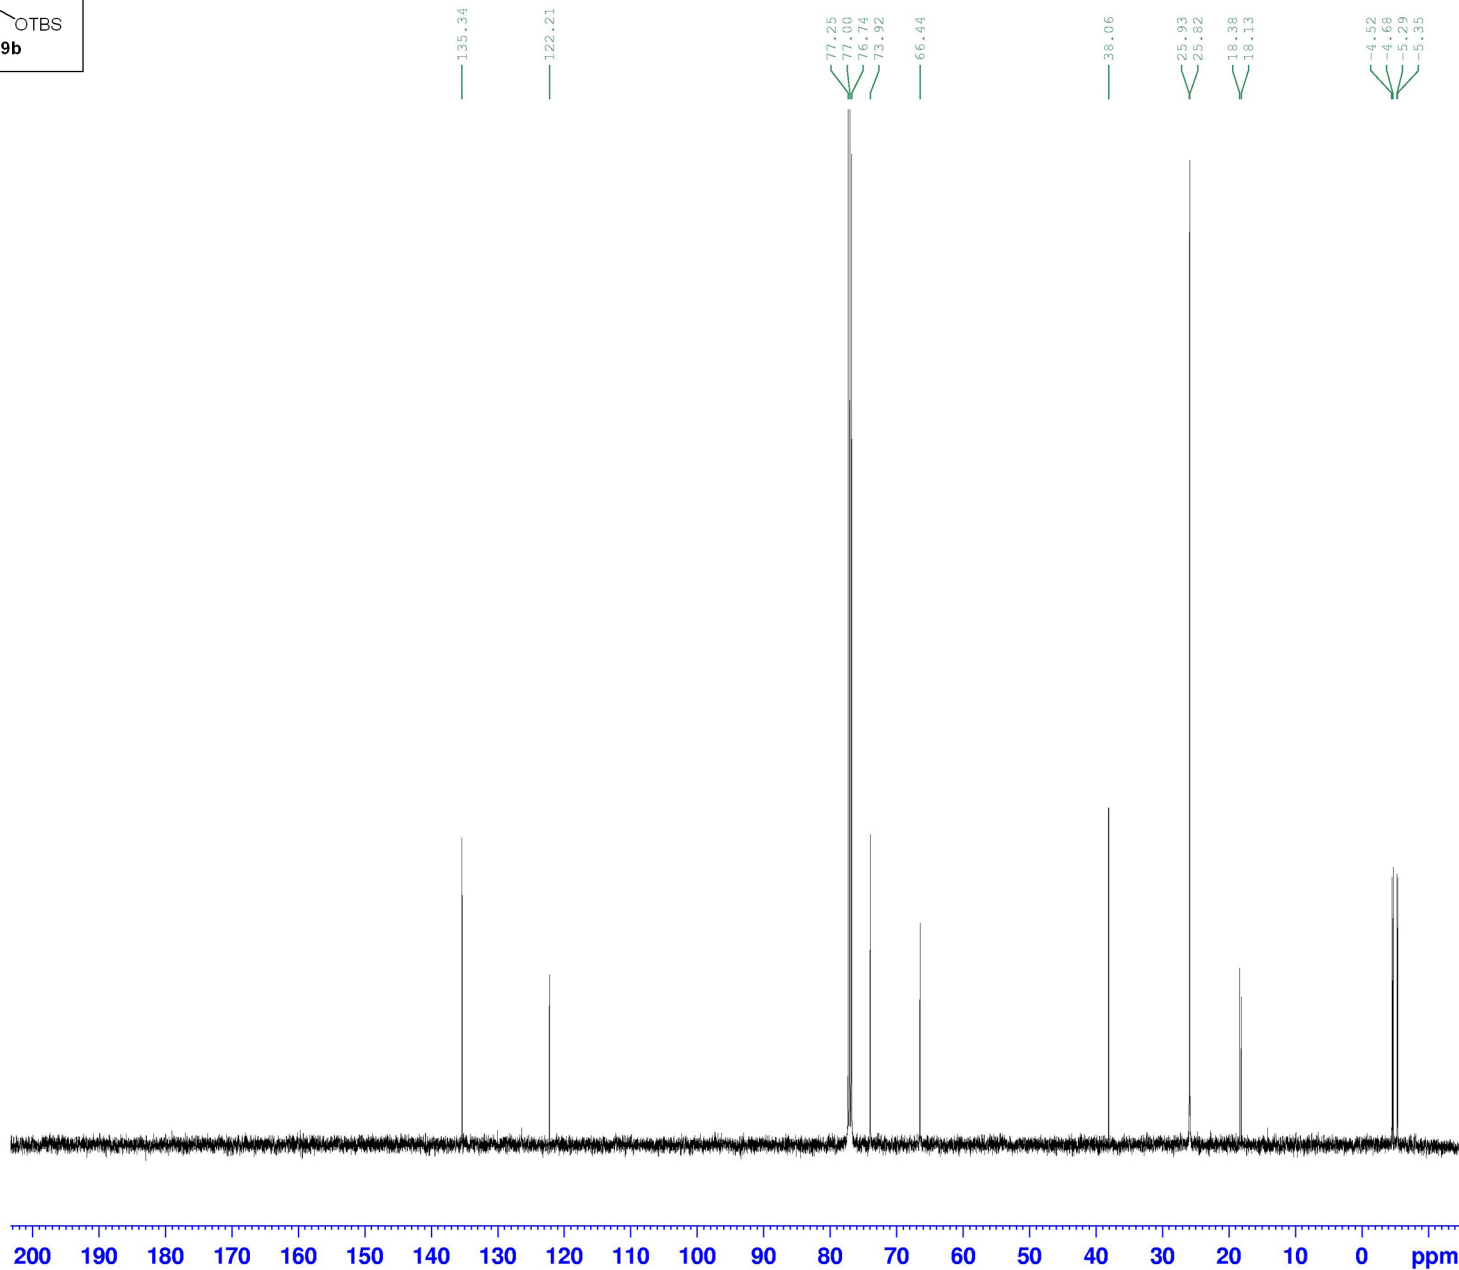

NAME May29-2008  
EXPNO 10  
PROCNO 1  
Date\_ 20080529  
Time 17.21  
INSTRUM drx500  
PROBHD 5 mm Multinu  
PULPROG zgpg30  
TD 65536  
SOLVENT CDCl3  
NS 256  
DS 4  
SWH 31446.541 Hz  
FIDRES 0.479836 Hz  
AQ 1.0420883 sec  
RG 6502  
DW 15.900 usec  
DE 6.00 usec  
TE 300.0 K  
D1 2.00000000 sec  
d11 0.03000000 sec  
d12 0.00002000 sec

===== CHANNEL f1 =====  
NUC1 13C  
P1 5.50 usec  
PL1 0.00 dB  
SFO1 125.7715719 MHz

===== CHANNEL f2 =====  
CPDPRG2 waltz16  
NUC2 1H  
PCPD2 95.00 usec  
PL2 0.00 dB  
PL12 19.00 dB  
PL13 19.00 dB  
SFO2 500.1320005 MHz  
SI 32768  
SF 125.7577914 MHz  
WDW EM  
SSB 0  
LB 1.00 Hz  
GB 0  
PC 1.40

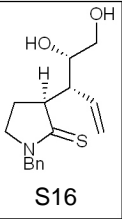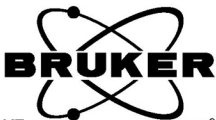

NAME ae074  
EXPNO 1  
PROCNO 1  
Date\_ 20080305  
Time 13.29  
INSTRUM drx500  
PROBHD 5 mm Multinu  
PULPROG zg30  
TD 82642  
SOLVENT CDCl3  
NS 16  
DS 2  
SWH 10330.578 Hz  
FIDRES 0.125004 Hz  
AQ 3.9999712 sec  
RG 574.7  
DW 48.400 use  
DE 6.00 use  
TE 300.0 K  
D1 1.00000000 sec

===== CHANNEL f1 =====  
NUC1 1H  
P1 15.50 use  
PL1 0.00 dB  
SF01 500.1330885 MHz  
SI 131072  
SF 500.1300000 MHz  
WDW EM  
SSB 0  
LB 0.30 Hz  
GB 0  
PC 1.00

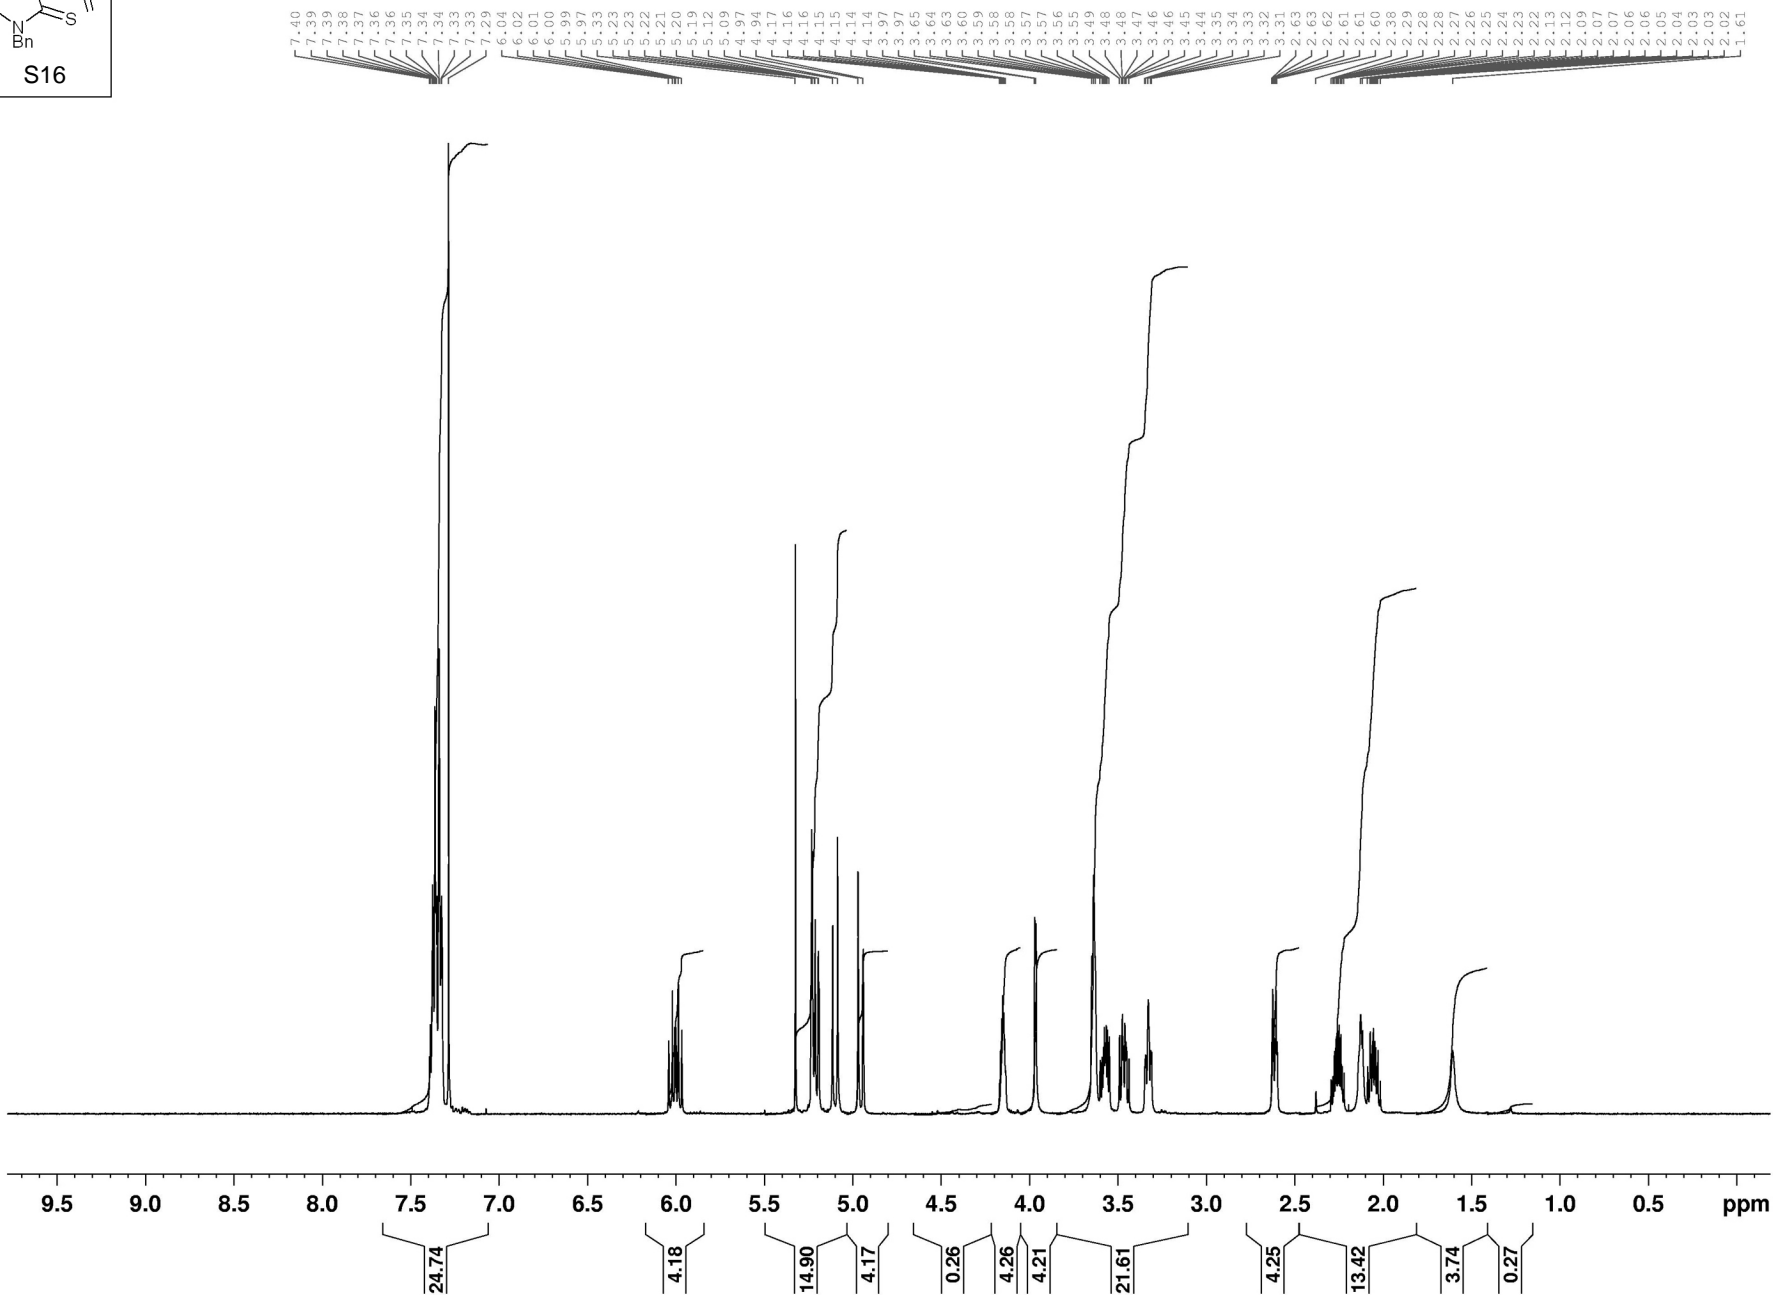

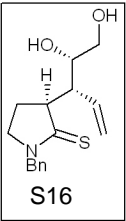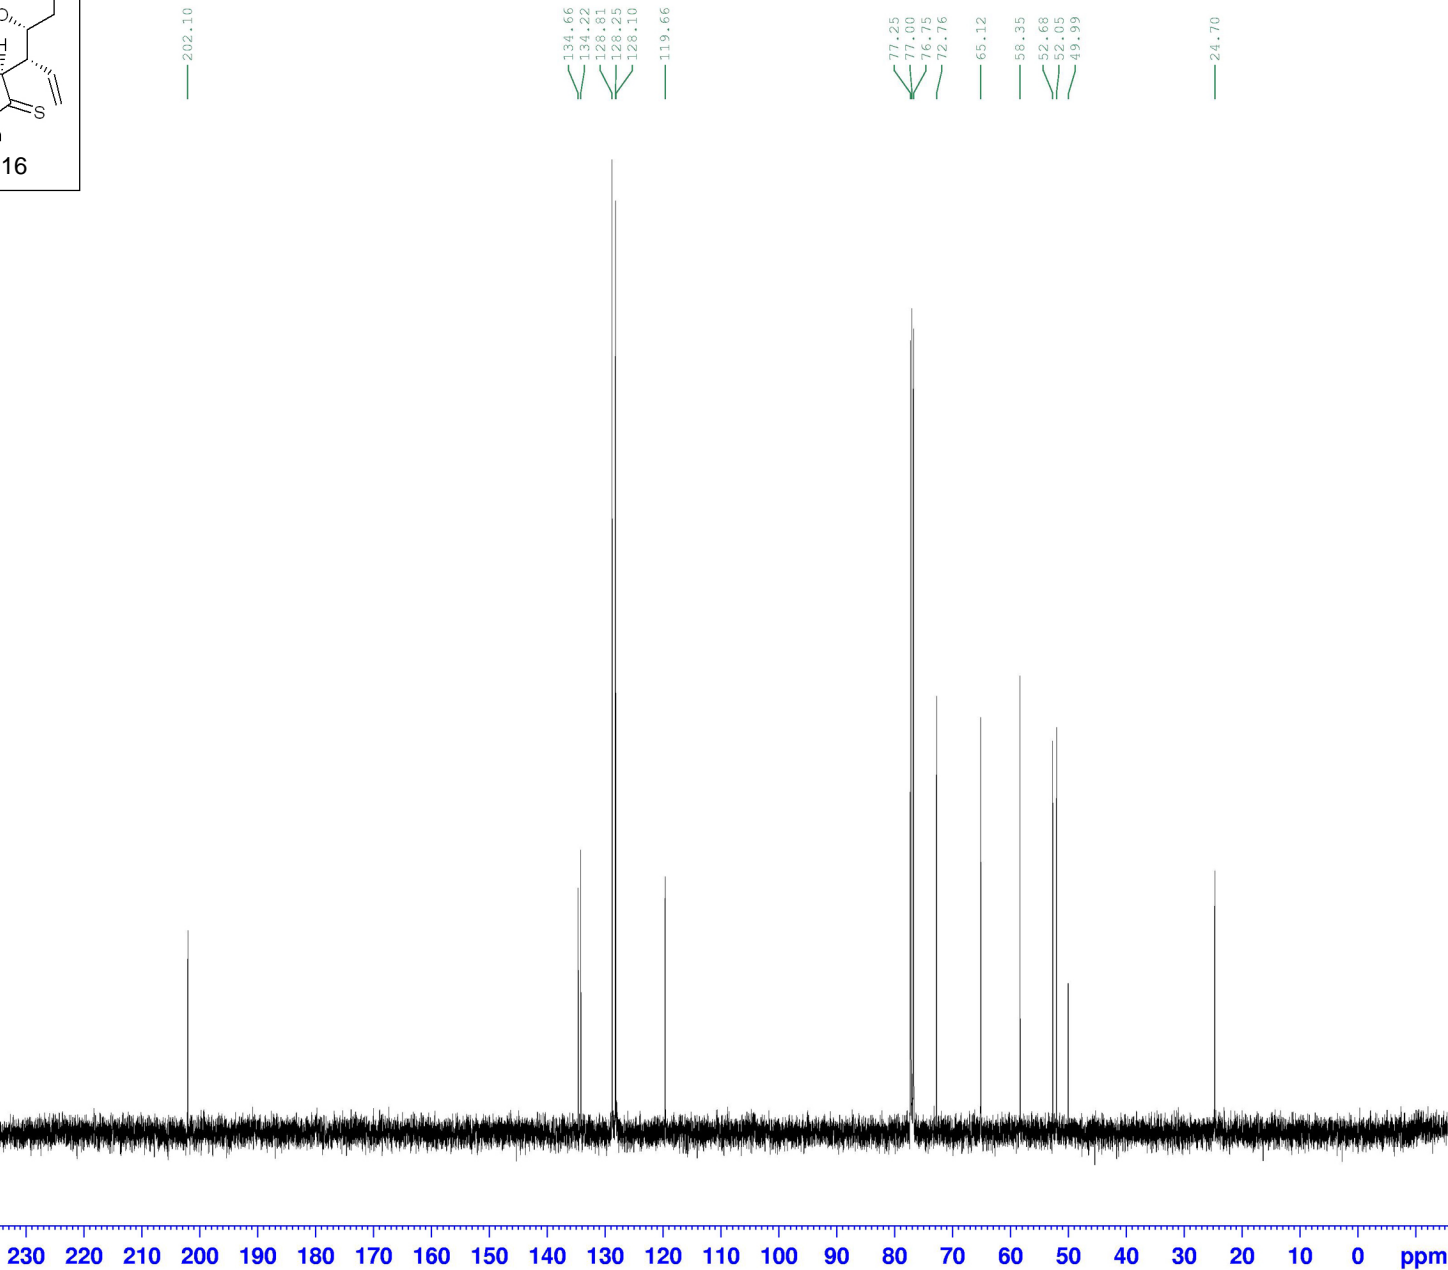

NAME ae014  
EXPNO 2  
PROCNO 1  
Date\_ 20071025  
Time 10.48  
INSTRUM drx500  
PROBHD 5 mm Multinu  
PULPROG zgpg30  
TD 65536  
SOLVENT CDC13  
NS 50  
DS 4  
SWH 31446.541 Hz  
FIDRES 0.479836 Hz  
AQ 1.0420883 sec  
RG 10321.3  
DW 15.900 usec  
DE 6.00 usec  
TE 300.0 K  
D1 2.00000000 sec  
d11 0.03000000 sec  
d12 0.00002000 sec

===== CHANNEL f1 =====  
NUC1 13C  
P1 5.10 usec  
PL1 0.00 dB  
SFO1 125.7715719 MHz

===== CHANNEL f2 =====  
CPDPRG2 waltz16  
NUC2 1H  
PCPD2 95.00 usec  
PL2 0.00 dB  
PL12 19.00 dB  
PL13 19.00 dB  
SFO2 500.1320005 MHz  
SI 131072  
SF 125.7578002 MHz  
WDW EM  
SSB 0  
LB 1.00 Hz  
GB 0  
PC 1.40

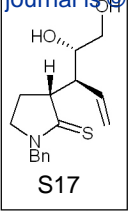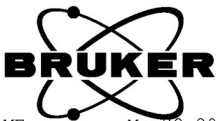

NAME Mar28-2008  
EXPNO 20  
PROCNO 1  
Date\_ 20080328  
Time 22.05  
INSTRUM drx500  
PROBHD 5 mm Multinu  
PULPROG zg30  
TD 82642  
SOLVENT CDCl3  
NS 16  
DS 2  
SWH 10330.578 Hz  
FIDRES 0.125004 Hz  
AQ 3.9999712 sec  
RG 912.3  
DW 48.400 use  
DE 6.00 use  
TE 300.0 K  
D1 1.00000000 sec

===== CHANNEL f1 ===  
NUC1 1H  
P1 15.50 use  
PL1 0.00 dB  
SF01 500.1330885 MHz  
SI 65536  
SF 500.1300000 MHz  
WDW EM  
SSB 0  
LB 0.30 Hz  
GB 0  
PC 1.00

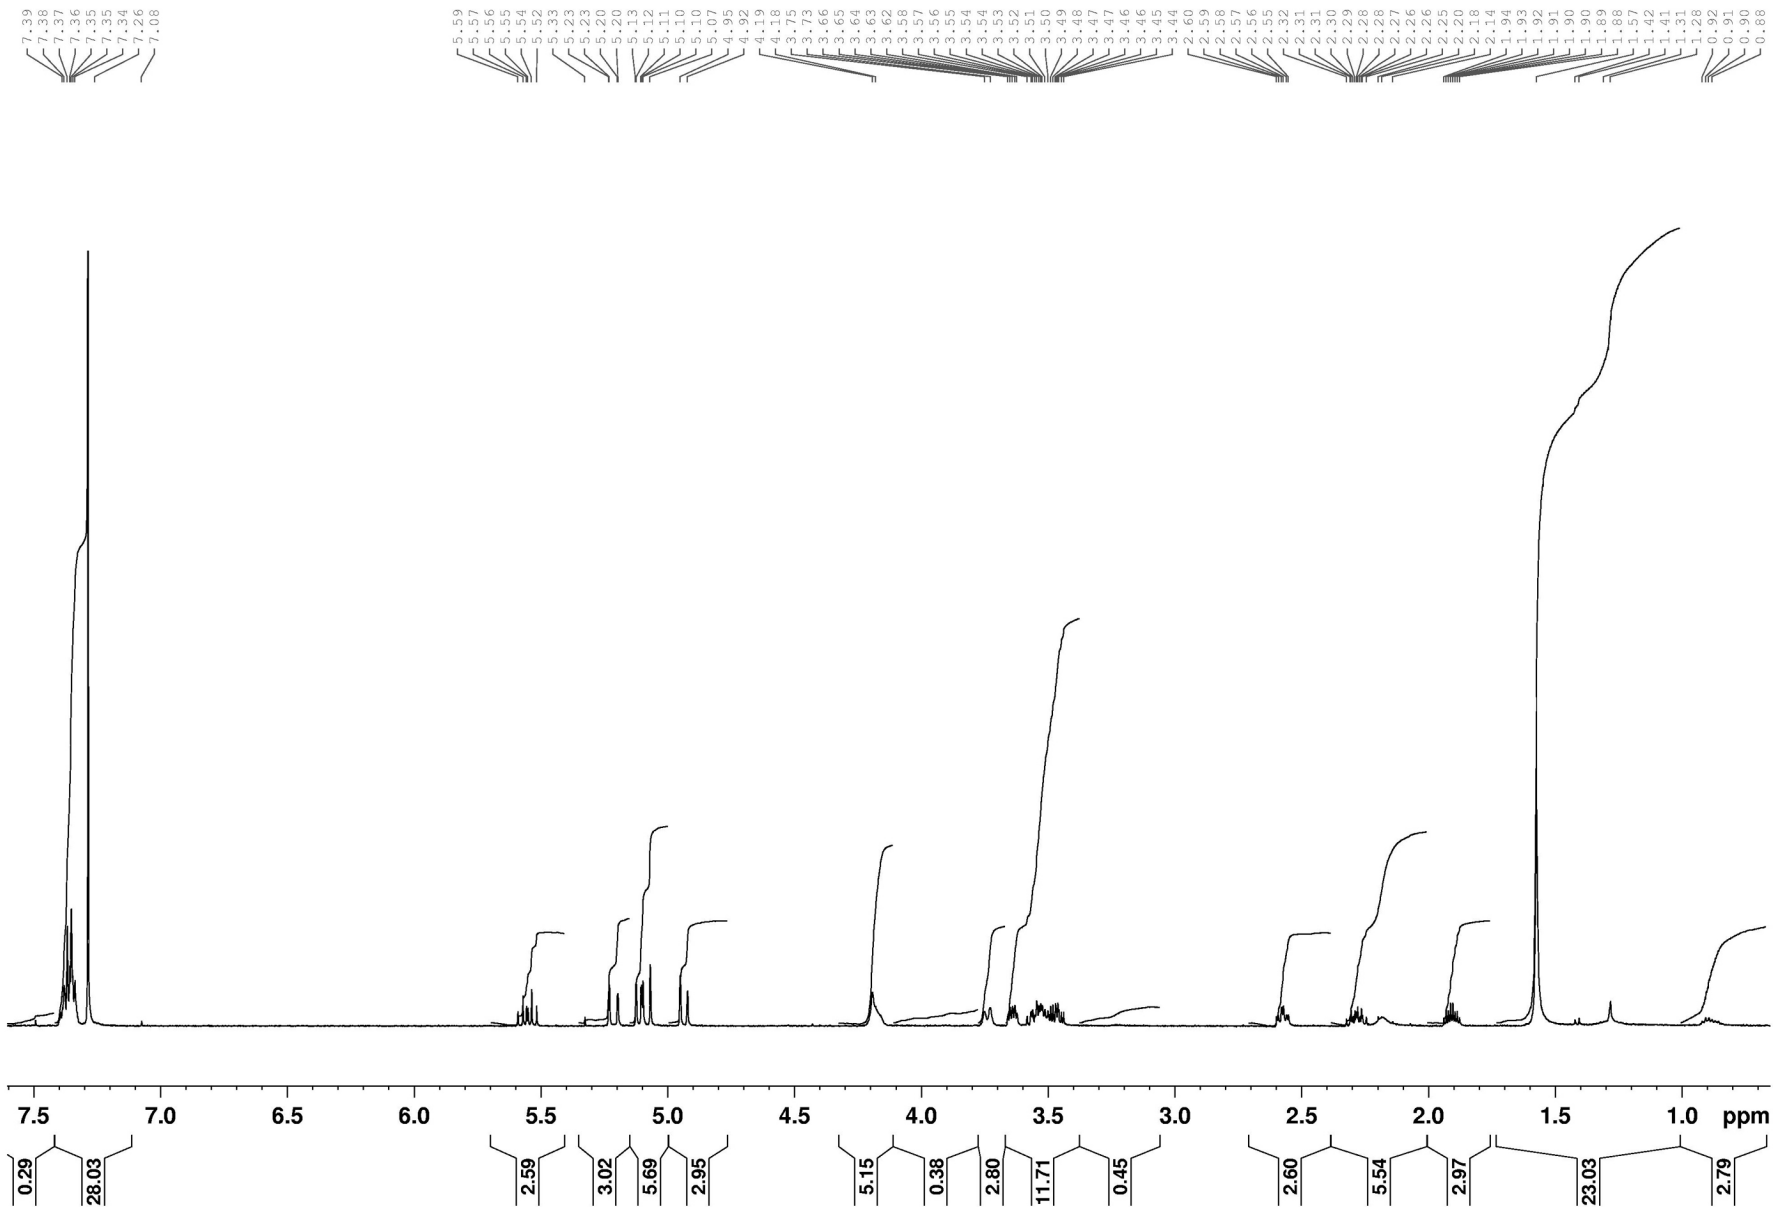

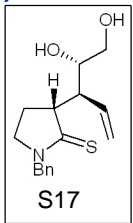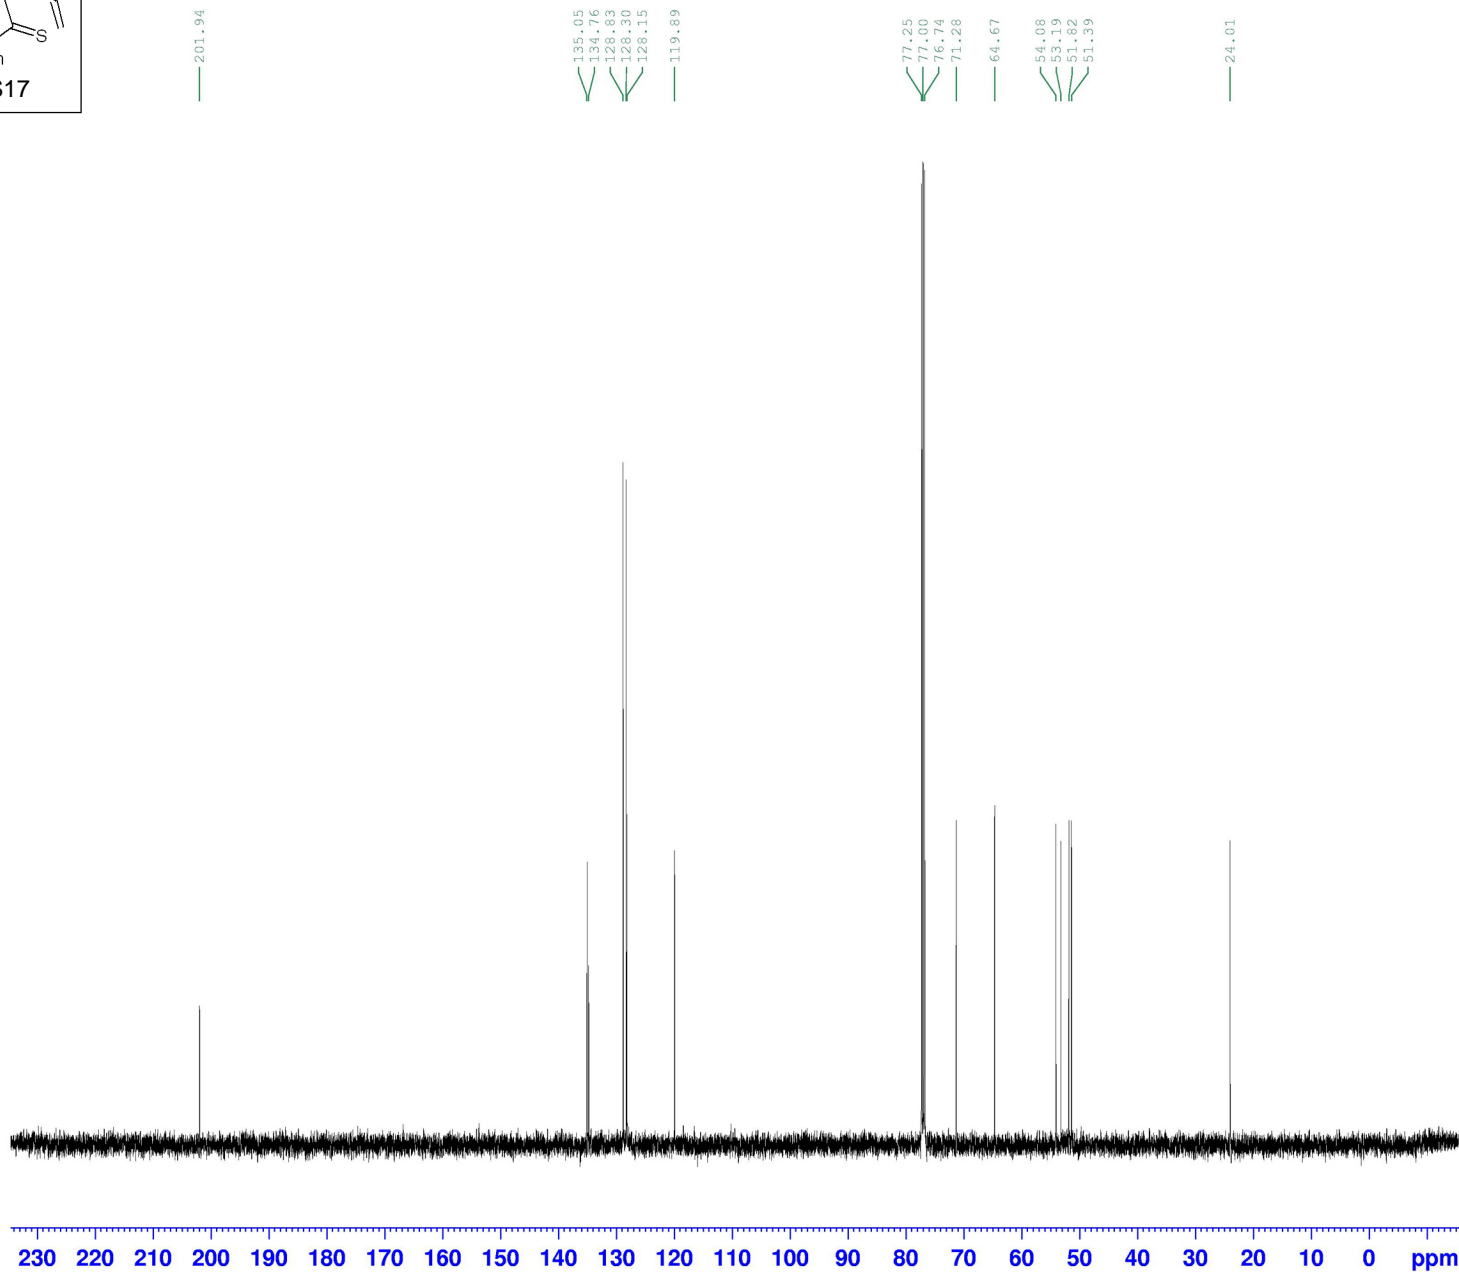

NAME ae012  
EXPNO 2  
PROCNO 1  
Date\_ 20071025  
Time 11.16  
INSTRUM drx500  
PROBHD 5 mm Multinu  
PULPROG zgpg30  
TD 65536  
SOLVENT CDC13  
NS 88  
DS 4  
SWH 31446.541 Hz  
FIDRES 0.479836 Hz  
AQ 1.0420883 sec  
RG 4597.6  
DW 15.900 usec  
DE 6.00 usec  
TE 300.0 K  
D1 2.00000000 sec  
d11 0.03000000 sec  
d12 0.00002000 sec

===== CHANNEL f1 =====  
NUC1 13C  
P1 5.10 usec  
PL1 0.00 dB  
SFO1 125.7715719 MHz

===== CHANNEL f2 =====  
CPDPRG2 waltz16  
NUC2 1H  
PCPD2 95.00 usec  
PL2 0.00 dB  
PL12 19.00 dB  
PL13 19.00 dB  
SFO2 500.1320005 MHz  
SI 131072  
SF 125.7577968 MHz  
WDW EM  
SSB 0  
LB 1.00 Hz  
GB 0  
PC 1.40

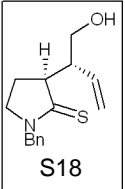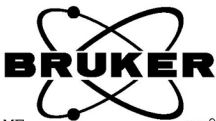

NAME ae076  
EXPNO 2  
PROCNO 1  
Date\_ 20080310  
Time 14.45  
INSTRUM drx500  
PROBHD 5 mm Multinu  
PULPROG zg30  
TD 82642  
SOLVENT CDCl3  
NS 16  
DS 2  
SWH 10330.578 Hz  
FIDRES 0.125004 Hz  
AQ 3.9999712 sec  
RG 512  
DW 48.400 use  
DE 6.00 use  
TE 300.0 K  
D1 1.00000000 sec

===== CHANNEL f1 =====  
NUC1 1H  
P1 15.50 use  
PL1 0.00 dB  
SF01 500.1330885 MHz  
SI 131072  
SF 500.1300000 MHz  
WDW EM  
SSB 0  
LB 0.30 Hz  
GB 0  
PC 1.00

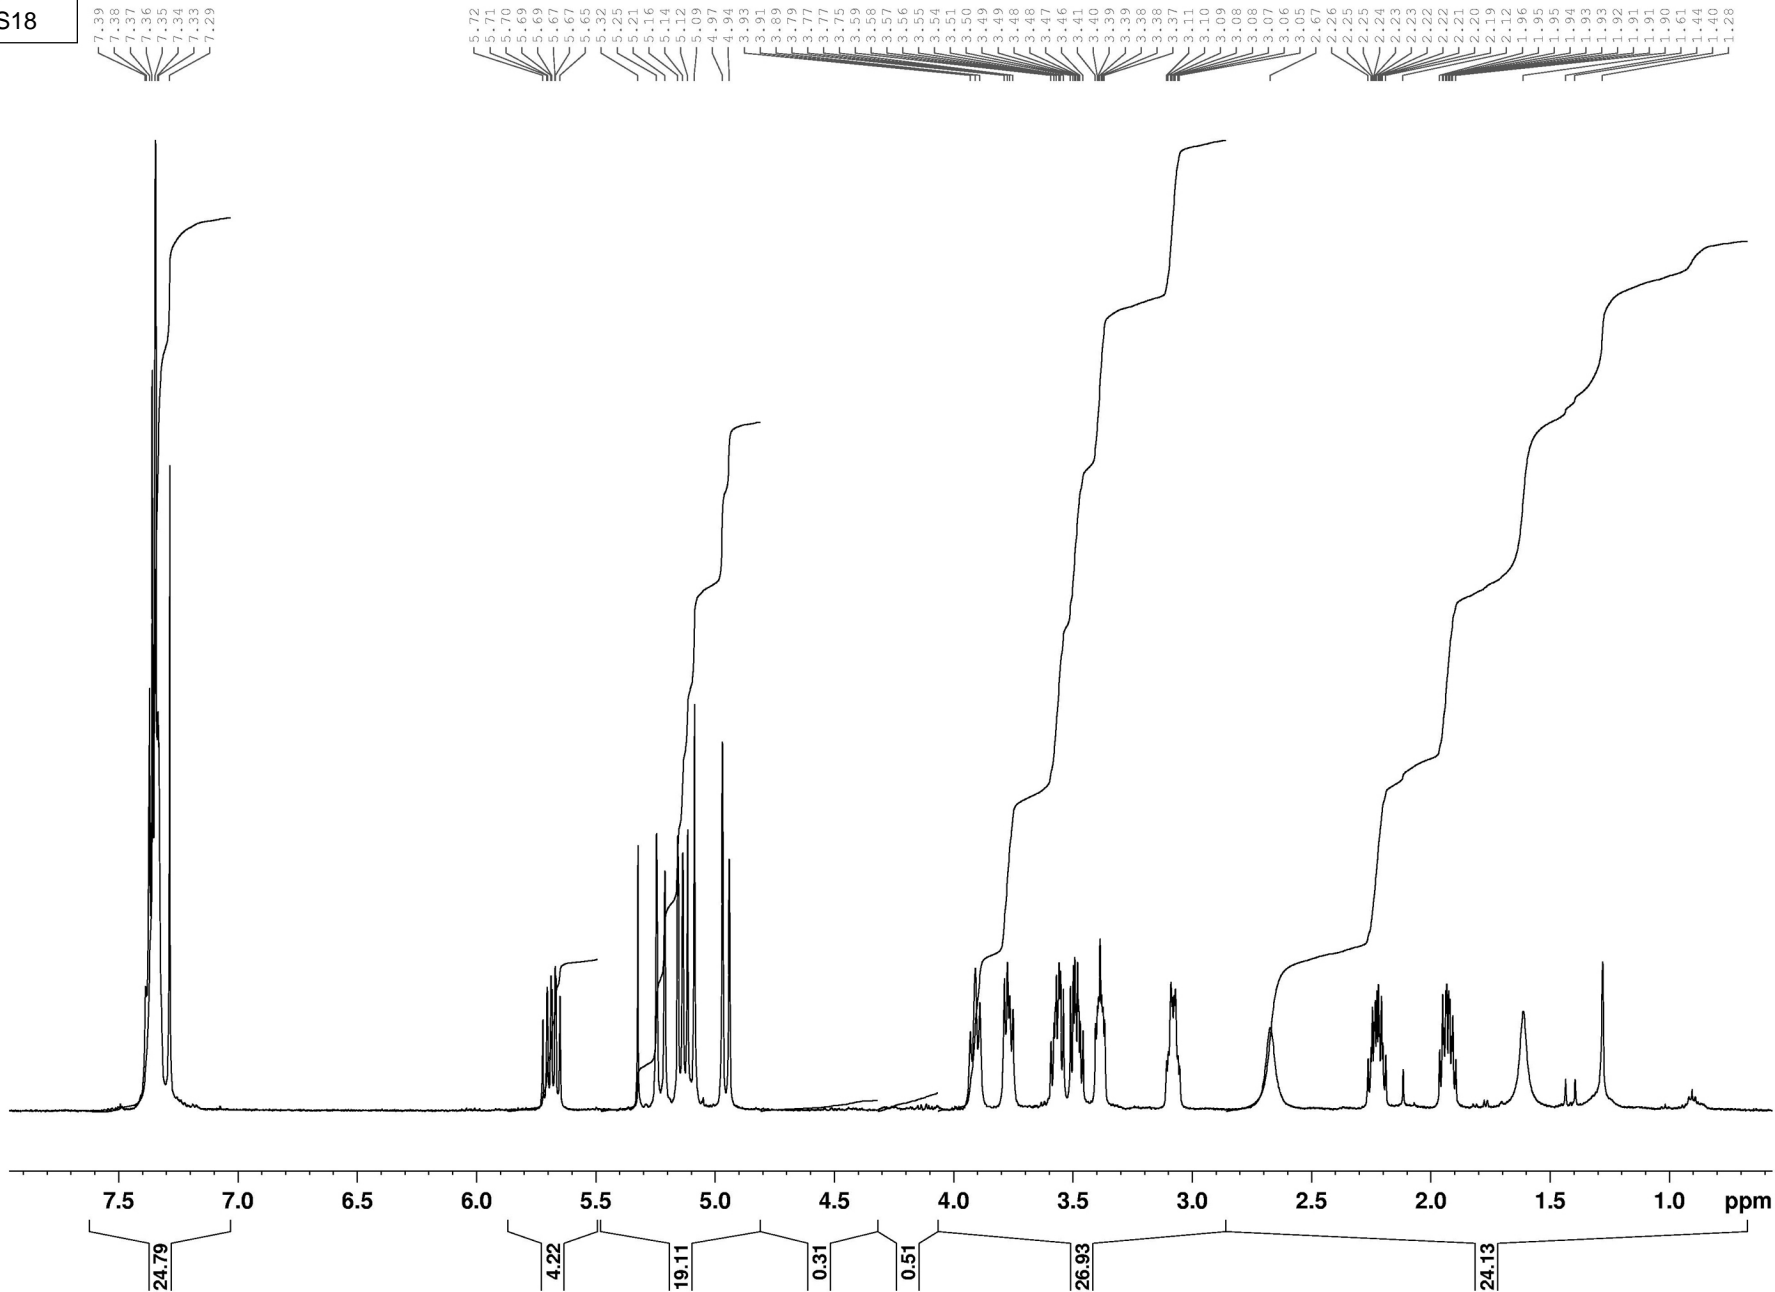

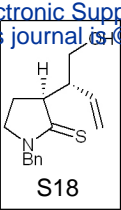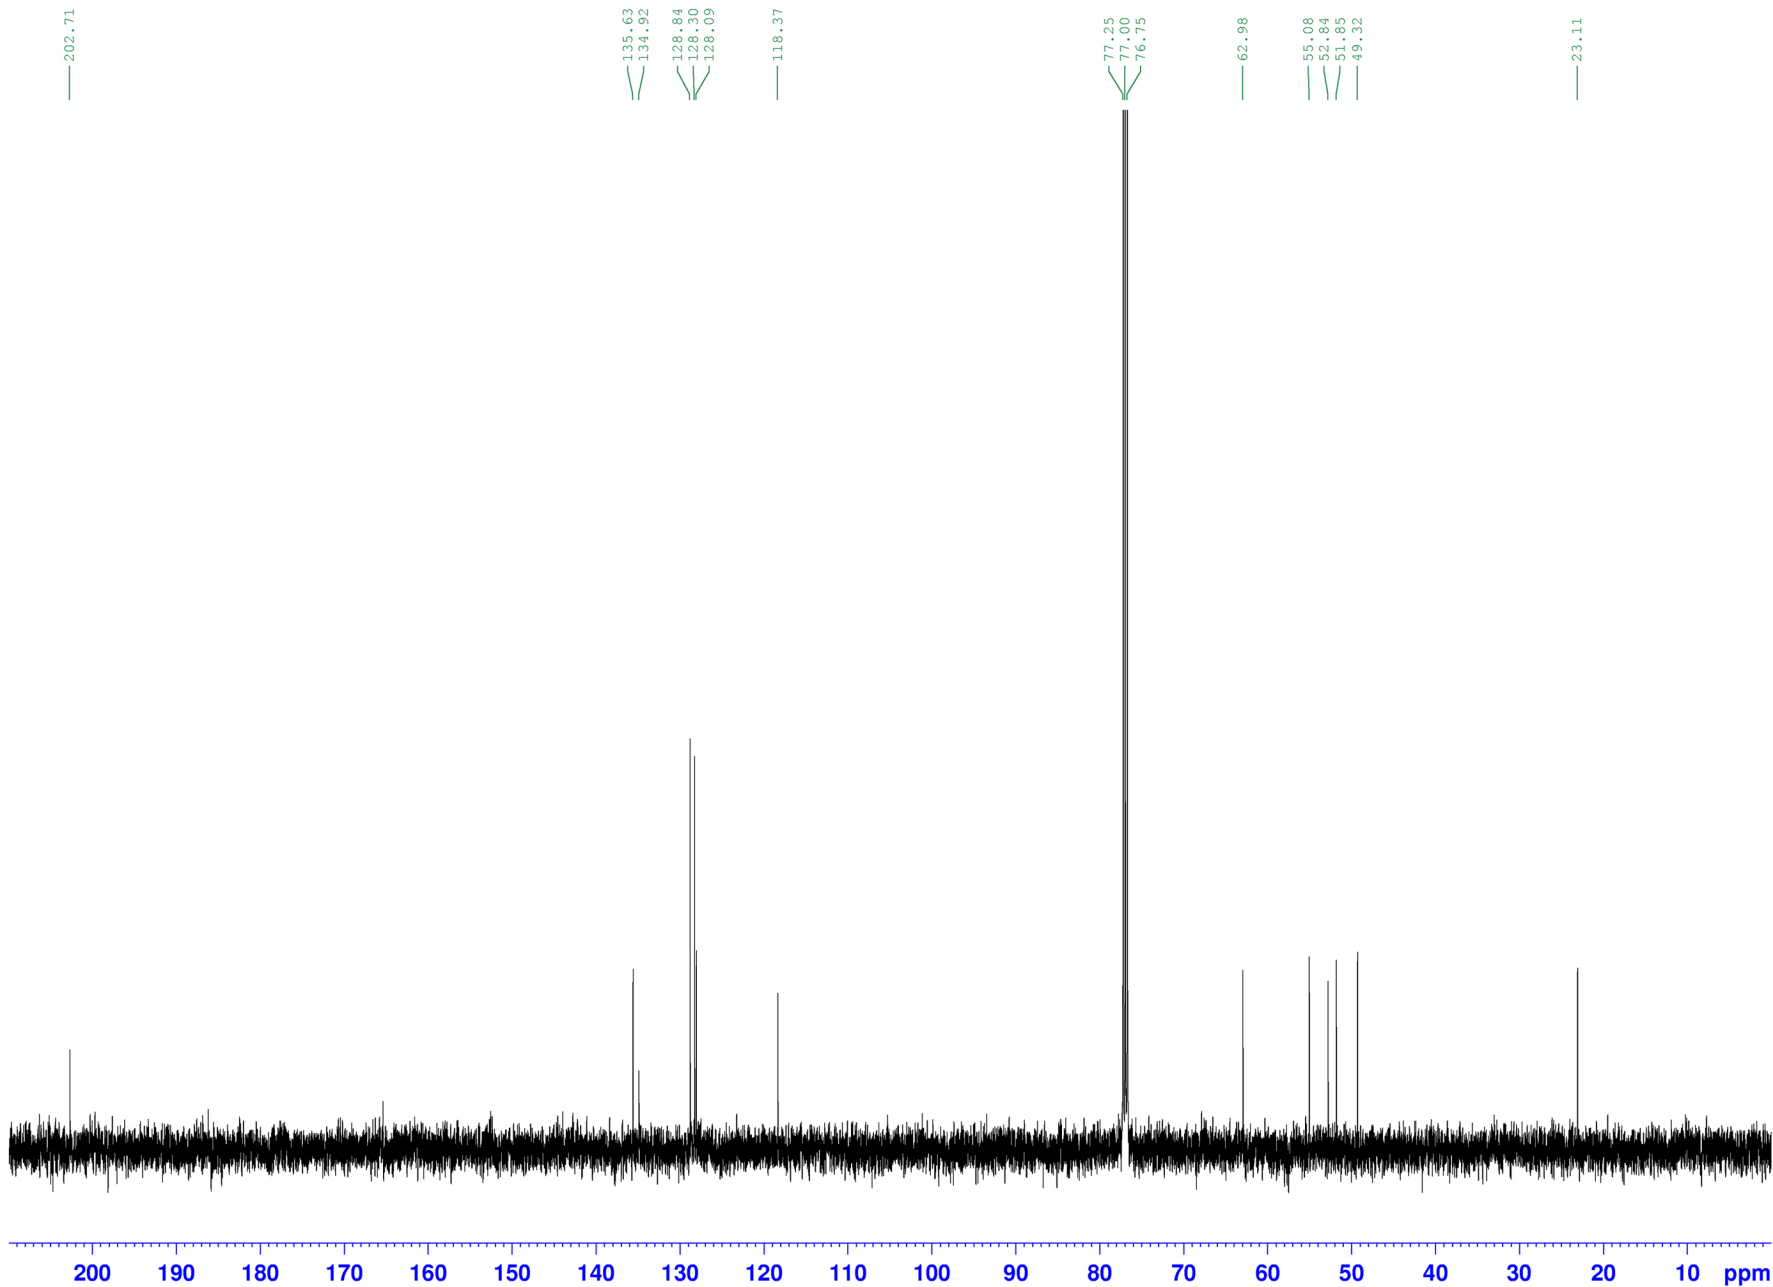

|                        |                 |
|------------------------|-----------------|
| NAME                   | ae076           |
| EXPNO                  | 3               |
| PROCNO                 | 1               |
| Date_                  | 20080310        |
| Time                   | 14.50           |
| INSTRUM                | drx500          |
| PROBHD                 | 5 mm Multinu    |
| PULPROG                | zgpg30          |
| TD                     | 65536           |
| SOLVENT                | CDC13           |
| NS                     | 128             |
| DS                     | 4               |
| SWH                    | 31446.541 Hz    |
| FIDRES                 | 0.479836 Hz     |
| AQ                     | 1.0420883 sec   |
| RG                     | 13004           |
| DW                     | 15.900 use      |
| DE                     | 6.00 use        |
| TE                     | 300.0 K         |
| D1                     | 2.00000000 sec  |
| d11                    | 0.03000000 sec  |
| d12                    | 0.00002000 sec  |
| ===== CHANNEL f1 ===== |                 |
| NUC1                   | 13C             |
| P1                     | 5.00 use        |
| PL1                    | 0.00 dB         |
| SFO1                   | 125.7715719 MHz |
| ===== CHANNEL f2 ===== |                 |
| CPDPRG2                | waltz16         |
| NUC2                   | 1H              |
| PCPD2                  | 95.00 use       |
| PL2                    | 0.00 dB         |
| PL12                   | 19.00 dB        |
| PL13                   | 19.00 dB        |
| SFO2                   | 500.1320005 MHz |
| SI                     | 131072          |
| SF                     | 125.7577925 MHz |
| WDW                    | EM              |
| SSB                    | 0               |
| LB                     | 1.00 Hz         |
| GB                     | 0               |
| PC                     | 1.40            |
